# Supplementary material for: Are there opportunities to improve care as patients transition through the cancer care continuum? A scoping review
Source: PubMed Central journal article supplement — BMJ Open. 2024 Dec 12;14(12):e078210. doi: 10.1136/bmjopen-2023-078210 (PMC11647354; doi:10.1136/bmjopen-2023-078210), 2024-12-12
Supplement: bmjopen-14-12-s003.pdf [file bmjopen-14-12-s003.pdf]

**Supplemental Table 1.** Characteristics of included evidence sources

| Author                         | Year | Country      | Language | Publication Type | Cancer Type                             | TiC                              | Objectives | Study Design                    | # of Patient TiC       | Outcome                   |
|--------------------------------|------|--------------|----------|------------------|-----------------------------------------|----------------------------------|------------|---------------------------------|------------------------|---------------------------|
| Aaltonen M <sup>1</sup>        | 2017 | Finland      | English  | Article          | Multiple                                | Transition to End-of-Life Care   | ■          | Retrospective Cohort            | 1998: 7.8<br>2013: 1.7 | Patient-Related           |
| Abd El Aziz M <sup>2</sup>     | 2021 | Sweden       | English  | Article          | Multiple                                | Oncology Care to Palliative Care | ■          | Cross-Sectional Online Survey   | -                      | Patient-Related           |
| Abdulaal A <sup>3</sup>        | 2018 | UK           | English  | Conference       | Colorectal                              | Multiple                         | ■          | Retrospective Cohort            | -                      | Patient-Related           |
| Abelson J. S <sup>4</sup>      | 2018 | USA          | English  | Article          | Colorectal                              | Multiple                         | ■          | Qualitative In-Depth Interviews | -                      | Patient-Related           |
| Abitbol J <sup>5</sup>         | 2023 | USA          | English  | Conference       | Multiple                                | Hospital to Home                 | ■          | Retrospective Cohort            | 103,244                | Patient-Related           |
| AbuSara A <sup>6</sup>         | 2019 | Jordan       | English  | Article          | Multiple                                | Readmission                      | ■          | Retrospective Cohort            | 313                    | Patient-Related           |
| Acher A <sup>7</sup>           | 2015 | USA          | English  | Article          | Gastric Adenocarcinoma                  | Non-Home Discharge               | ■          | Retrospective Cohort            |                        | Patient-Related           |
| Adam R <sup>8</sup>            | 2018 | UK           | English  | Article          | Multiple                                | Multiple                         | ■          | Review                          | -                      | System-Related            |
| Adams S.V <sup>9</sup>         | 2017 | USA          | English  | Article          | Multiple                                | Diagnosis to Treatment           | ■ ■        | Retrospective Cohort            | -                      | System-Related            |
| Adewuyi-Dalton R <sup>10</sup> | 1998 | UK           | English  | Article          | Breast                                  | Multiple                         | ■          | Qualitative Interviews          | -                      | Patient-Related           |
| Adolfsson K <sup>11</sup>      | 2022 | USA          | English  | Conference       | Gastric                                 | Diagnosis to Treatment           | ■ ■        | Cross-Sectional Online Survey   | -                      | Patient-Related           |
| Ahle G <sup>12</sup>           | 2018 | France       | English  | Conference       | Primary Central Nervous System-Lymphoma | Multiple                         | ■ ■        | Prospective Cohort              |                        | System-Related            |
| Aihie N <sup>13</sup>          | 2022 | USA          | English  | Conference       | Lung                                    | Diagnosis to Treatment           | ■          | Retrospective Cohort            | -                      | Patient-Related           |
| Aitini E <sup>14</sup>         | 2012 | Italy        | Italian  | Article          | Multiple                                | Oncology to Palliative Care      | ■          | -                               | -                      | Patient-Related           |
| Ajay P <sup>15</sup>           | 2023 | Australia    | English  | Conference       | Multiple                                | Oncology to Palliative Care      | ■          | Retrospective Case Note Review  | 63                     | Patient-Related           |
| Ajrouch A <sup>16</sup>        | 2022 | USA          | English  | Article          | Multiple                                | Multiple                         | ■          | Retrospective Cohort            | -                      | Patient- & System-Related |
| Alam E <sup>17</sup>           | 2008 | USA          | English  | Article          | Neoplasm                                | Readmission                      | ■ ■        | Retrospective Cohort            | 188                    | Patient- & System-Related |
| Alanen V <sup>18</sup>         | 2019 | Finland      | English  | Article          | Lung                                    | Multiple                         | ■          | Retrospective Cohort            | -                      | System-Related            |
| Alawawdeh A <sup>19</sup>      | 2021 | Iran         | English  | Article          | Multiple                                | Hospital to Home                 | ■          | Mixed Methods                   | -                      | Patient- & System-Related |
| Alfano C <sup>20</sup>         | 2022 | USA          | English  | Article          | Colorectal                              | Readmission                      | ■          | Retrospective Cohort            | -                      | Patient-Related           |
| Alizadeh Z <sup>21</sup>       | 2021 | Saudi Arabia | English  | Article          | Colorectal                              | Readmission                      | ■          | Retrospective Cohort            | -                      | Patient-Related           |

| Author                                | Year | Country     | Language | Publication Type | Cancer Type   | TiC                                   | Objectives                                                                            | Study Design                       | # of Patient TiC | Outcome                   |
|---------------------------------------|------|-------------|----------|------------------|---------------|---------------------------------------|---------------------------------------------------------------------------------------|------------------------------------|------------------|---------------------------|
| Almaawiy U <sup>22</sup>              | 2014 | Canada      | English  | Article          | Multiple      | Home to Family Physician              |    | Retrospective Cohort               | 8078             | Patient-Related           |
| Alvaro-Meca A <sup>23</sup>           | 2012 | Spain       | English  | Article          | Pancreatic    | Discharge                             |    | Multi-State Model                  | -                | Patient-Related           |
| Alves Soares Ferreira N <sup>24</sup> | 2017 | Brazil      | English  | Article          | Breast        | Diagnosis to Treatment                |    | Retrospective Cohort               | -                | System-Related            |
| Alyabsi M <sup>25</sup>               | 2021 | Canada      | English  | Article          | Breast        | Oncology to Primary Care              |    | Online Survey                      | -                | Patient- & System-Related |
| Alyabsi M <sup>26</sup>               | 2022 | USA         | English  | Article          | Multiple      | Hospital to Home                      |    | Cross-Sectional Survey             | -                | Patient-Related           |
| Anderson A <sup>27</sup>              | 2022 | UK          | English  | Guidelines       | Multiple      | Multiple                              |    | Cross-Sectional Survey             | -                | Patient- & System-Related |
| Anderson M.L <sup>28</sup>            | 2016 | USA         | English  | Conference       | Cervical      | Multiple                              |    | -                                  | -                | System-Related            |
| Ang W.H.D <sup>29</sup>               | 2016 | Singapore   | English  | Article          | Multiple      | Hospital to Home                      |    | Qualitative Interview              | -                | Patient-Related           |
| Angarita F <sup>30</sup>              | 2022 | Japan       | English  | Article          | Multiple      | Discharge                             |    | Exploratory Path Analysis          | -                | System-Related            |
| Anonymous <sup>31</sup>               | 2019 | USA         | English  | Conference       | Colorectal    | Diagnosis to Treatment                |    | Retrospective Chart Review         | -                | Patient-Related           |
| Aoyanagi M <sup>32</sup>              | 2022 | Canada      | English  | Article          | Lung          | Oncologist to Family Physician        |    | Randomized Trial                   | -                | Patient-Related           |
| Arientyl V <sup>33</sup>              | 2020 | Switzerland | English  | Article          | Multiple      | Multiple                              |    | Retrospective Cohort               | 315              | Patient- & System-Related |
| Asher A <sup>34</sup>                 | 2014 | USA         | English  | Article          | Multiple      | Rehabilitation Facility to Acute Care |    | Retrospective Chart Review         | -                | System-Related            |
| Aubert C <sup>35</sup>                | 2017 | Switzerland | English  | Article          | Multiple      | Multiple                              |    | Retrospective Cohort               | 121,136          | System-Related            |
| Aubin M <sup>36</sup>                 | 2021 | Canada      | English  | Article          | Head and Neck | Diagnosis to Treatment                |   | Retrospective Chart Review         | 68               | Patient-Related           |
| Aubin M <sup>37</sup>                 | 2012 | Canada      | English  | Conference       | Colorectal    | Curative to Palliative Care           |  | -                                  | -                | System-Related            |
| Aubin M <sup>38</sup>                 | 2012 | Canada      | English  | Article          | Multiple      | Multiple                              |  | Review                             | -                | Patient-Related           |
| Aubin M <sup>39</sup>                 | 2015 | Canada      | English  | Article          | Lung          | Multiple                              |  | Randomized Clinical Trial          | -                | System-Related            |
| Aunan S. T <sup>40</sup>              | 2019 | Norway      | English  | Article          | Breast        | Multiple                              |  | Qualitative Descriptive Interviews | -                | Patient-Related           |
| Axelsen K.R <sup>41</sup>             | 2015 | Denmark     | English  | Article          | Multiple      | Multiple                              |  | Questionnaire                      | -                | System-Related            |
| Back A <sup>42</sup>                  | 2008 | USA         | English  | Article          | Multiple      | Active Treatment to Palliative Care   |  | Cross-Sectional Questionnaire      | -                | Patient-Related           |
| Back A <sup>43</sup>                  | 2005 | USA         | English  | Article          | Multiple      | Active Treatment to End-of-Life Care  |  | Cross-Sectional Questionnaire      | 228,029          | Patient-Related           |
| Bahler C <sup>44</sup>                | 2023 | USA         | English  | Conference       | Melanoma      | Diagnosis to Treatment                |  | Retrospective Cohort               | -                | Patient-Related           |

| Author                           | Year | Country     | Language | Publication Type | Cancer Type   | TiC                                            | Objectives                                                                                                                                                                                                                                                  | Study Design                           | # of Patient TiC | Outcome                   |
|----------------------------------|------|-------------|----------|------------------|---------------|------------------------------------------------|-------------------------------------------------------------------------------------------------------------------------------------------------------------------------------------------------------------------------------------------------------------|----------------------------------------|------------------|---------------------------|
| Bahler C <sup>45</sup>           | 2018 | Switzerland | English  | Article          | Multiple      | Multiple                                       |                                                                                                                                                                          | Retrospective Cohort                   | -                | Patient-Related           |
| Bain N.S.C <sup>46</sup>         | 2000 | UK          | English  | Article          | Colorectal    | Multiple                                       |                                                                                                                                                                          | Qualitative                            | -                | Patient-Related           |
| Baird H <sup>47</sup>            | 2019 | Australia   | English  | Article          | Multiple      | Active Treatment to Survivorship               |                                                                                       | Multi-Method                           | -                | Patient-Related           |
| Balentine C. J <sup>48</sup>     | 2015 | USA         | English  | Conference       | Colorectal    | Non-Home Discharge                             |                                                                                       | Cohort                                 | -                | Patient-Related           |
| Balogh L <sup>49</sup>           | 2021 | USA         | English  | Conference       | Lymphoma      | Diagnosis to Treatment                         |                                                                                                                                                                          | Retrospective Chart Review             | -                | Patient- & System-Related |
| Banala S <sup>50</sup>           | 2015 | USA         | English  | Conference       | Multiple      | Emergency Center to Hospitalist                |    | Pilot                                  | -                | System-Related            |
| Baranowski M <sup>51</sup>       | 2020 | Israel      | English  | Article          | Multiple      | Multiple                                       |                                                                                       | Semi-Structured interviews             | -                | Patient-Related           |
| Barbaro M <sup>52</sup>          | 2019 | Canada      | English  | Conference       | Lymphoma      | Acute Cancer Care to Survivorship              |                                                                                                                                                                          | Survey                                 | -                | Patient- & System-Related |
| Barnet M <sup>53</sup>           | 2013 | Australia   | English  | Article          | Multiple      | Multiple                                       |                                                                                       | Cross Sectional                        | -                | System-Related            |
| Bashkin O <sup>54</sup>          | 2023 | USA         | English  | Article          | Head and Neck | Readmission                                    |                                                                                       | Surveys and Semi-Structured interviews | 7,4              | Patient-Related           |
| Bates C <sup>55</sup>            | 2022 | Denmark     | English  | Article          | Multiple      | Oncology to Palliative Care                    |                                                                                                                                                                          | Randomized Controlled Trial            | -                | Patient-Related           |
| Bazzett-Matabele L <sup>56</sup> | 2018 | Germany     | English  | Conference       | Multiple      | Primary Care Hospital to Rehabilitation Clinic |                                                                                                                                                                          | -                                      | -                | System-Related            |
| Beadle B.M <sup>57</sup>         | 2014 | USA         | English  | Article          | Head and Neck | Active Treatment to Survivorship               |                                                                                                                                                                          | Exploratory Qualitative                | -                | Patient-Related           |
| Beatty S <sup>58</sup>           | 2023 | USA         | English  | Article          | Multiple      | Rehabilitation Center to Acute Care            |                                                                                                                                                                          | Retrospective Cohort                   | 330, 111         | Patient-Related           |
| Beaver K <sup>59</sup>           | 2010 | UK          | English  | Article          | Colorectal    | Multiple                                       |                                                                                                                                                                          | Review                                 | -                | Patient- & System-Related |
| Bell D <sup>60</sup>             | 2006 | Canada      | English  | Conference       | Testicular    | Surgical Delay                                 |                                                                                                                                                                          | -                                      | -                | Patient-Related           |
| Bender J.L <sup>61</sup>         | 2016 | Canada      | English  | Article          | Thyroid       | Multiple                                       |                                                                                       | Cross Sectional Survey                 | -                | Patient-Related           |
| Benthien K <sup>62</sup>         | 2020 | USA         | English  | Conference       | Multiple      | Discharge                                      |                                                                                                                                                                                                                                                             | Intervention                           | -                | Patient- & System-Related |
| Bhakta A <sup>63</sup>           | 2022 | USA         | English  | Article          | Breast        | Diagnosis to Treatment                         |                                                                                       | Retrospective Cohort                   | -                | Patient-Related           |
| Bhattacharya M <sup>64</sup>     | 2022 | Not Stated  | English  | Conference       | Multiple      | Oncology to Primary Care                       |                                                                                                                                                                          | Intervention Evaluation                | -                | Patient- & System-Related |
| Bhutiani N <sup>65</sup>         | 2020 | Australia   | English  | Conference       | Multiple      | Multiple                                       |                                                                                                                                                                        | Retrospective Audit                    | 54,6             | Patient- & System-Related |
| Birken S <sup>66</sup>           | 2021 | Netherlands | English  | Article          | Testicular    | Oncology to Primary Care                       |                                                                                                                                                                        | Observational Cohort Study             | 364              | System-Related            |
| Blanchard G <sup>67</sup>        | 2020 | Sweden      | English  | Thesis           | Breast        | Multiple                                       |                                                                                                                                                                        | Mixed-Methods                          | -                | Patient-Related           |

| Author                           | Year | Country   | Language | Publication Type | Cancer Type   | TiC                                   | Objectives                                                                                                                                                                  | Study Design                               | # of Patient TiC | Outcome                   |
|----------------------------------|------|-----------|----------|------------------|---------------|---------------------------------------|-----------------------------------------------------------------------------------------------------------------------------------------------------------------------------|--------------------------------------------|------------------|---------------------------|
| Bleicher R.J. <sup>68</sup>      | 2019 | USA       | English  | Article          | Breast        | Diagnosis to Surgery                  |                                                                                          | Institutional Initiative                   | -                | System-Related            |
| Bodurka D.C. <sup>69</sup>       | 2016 | USA       | English  | Conference       | Multiple      | Provider to Provider                  |                                                                                          | Follow Back Survey                         | -                | Patient-Related           |
| Boer H. <sup>70</sup>            | 2022 | Denmark   | English  | Policy Brief     | Multiple      | Multiple                              |                                                                                          | -                                          | -                | Patient- & System-Related |
| Boman L. <sup>71</sup>           | 2022 | USA       | English  | Dissertation     | Myeloma       | Acute Care to Long Term               |       | Multi-Study                                | -                | Patient- & System-Related |
| Bone A.E. <sup>72</sup>          | 2016 | UK        | English  | Article          | Multiple      | Admission to Hospital                 |                                                                                          | Population-Based Follow-Back Survey Design | -                | System-Related            |
| Boyd K. <sup>73</sup>            | 2010 | UK        | English  | Article          | Multiple      | Multiple                              |       | Prospective Cohort                         |                  | System-Related            |
| Brant J.M. <sup>74</sup>         | 2016 | USA       | English  | Article          | Multiple      | Chemotherapy to Survivorship          |       | Descriptive & Literature Review            | -                | System-Related            |
| Brao I. <sup>75</sup>            | 2019 | Spain     | English  | Conference       | Lung          | Multiple                              |                                                                                          | Retrospective Cohort                       | 117              | Patient-Related           |
| Breitkopf C. <sup>76</sup>       | 2014 | USA       | English  | Article          | Multiple      | Admission to Hospice                  |                                                                                          | Retrospective Review                       | -                | Patient-Related           |
| Brennan M.E. <sup>77</sup>       | 2010 | Australia | English  | Article          | Breast        | Multiple                              |                                                                                          | Quality Improvement                        | -                | Patient-Related           |
| Bridge E. <sup>78</sup>          | 2019 | Canada    | English  | Article          | Multiple      | Multiple                              |                                                                                          | Chart Review                               | -                | System-Related            |
| Brinkerhoff B.T. <sup>79</sup>   | 2012 | USA       | English  | Article          | Head and Neck | Diagnosis to Treatment                |                                                                                          | Sequential Explanatory Mixed Methods       |                  | Patient-Related           |
| Bristol A.A. <sup>80</sup>       | 2022 | USA       | English  | Article          | -             | Intrahospital                         | -                                                                                                                                                                           | -                                          | -                | Patient-Related           |
| Brockopp D. <sup>81</sup>        | 2010 | USA       | English  | Book             | Multiple      | Multiple                              |                                                                                        | Retrospective Cohort                       | 31               | Patient- & System-Related |
| Broglia C.M.G. <sup>82</sup>     | 2016 | Italy     | English  | Conference       | Multiple      | Palliative Care to Other Settings     |   | Online Survey                              | -                | Patient- & System-Related |
| Broussard C.S. <sup>83</sup>     | 2017 | USA       | English  | Dissertation     | Multiple      | Active Treatment to Hospice           |                                                                                        | Systematic Review                          |                  | System-Related            |
| Bryant-Lukosius D. <sup>84</sup> | 2015 | Canada    | English  | Article          | Multiple      | Multiple                              |                                                                                        | Qualitative                                | -                | Patient-Related           |
| Buac N. <sup>85</sup>            | 2022 |           | English  | Conference       | Multiple      | Active Treatment to Survivorship Care |                                                                                        | Sequential Explanatory                     | -                | Patient-Related           |
| Budde H. <sup>86</sup>           | 2022 | Canada    | English  | Conference       | Multiple      | Other Setting to Palliative Care      |                                                                                        | Mixed-Methods                              | -                | System-Related            |
| Burg M. A. <sup>87</sup>         | 2009 | USA       | English  | Article          | Breast        | Oncology to Primary Care              |   | Qualitative Focus Groups                   | -                | System-Related            |
| Burhenn P. <sup>88</sup>         | 2020 | Israel    | English  | Conference       | Multiple      | Primary Care to Oncology              |                                                                                        | Review                                     | -                | Patient-Related           |
| Burkart M. <sup>89</sup>         | 2019 | USA       | English  | Article          | Lung          | Active Treatment to Survivorship      |                                                                                        | Review                                     |                  | Patient- & System-Related |

| Author                             | Year | Country    | Language | Publication Type | Cancer Type | TiC                                 | Objectives                                                                                                                                                                  | Study Design                    | # of Patient TiC | Outcome                   |
|------------------------------------|------|------------|----------|------------------|-------------|-------------------------------------|-----------------------------------------------------------------------------------------------------------------------------------------------------------------------------|---------------------------------|------------------|---------------------------|
| Burke N <sup>90</sup>              | 2016 | USA        | English  | Article          | Breast      | Active Treatment to Survivorship    |                                                                                          | Qualitative Focus Groups        | -                | Patient-Related           |
| Burke O <sup>91</sup>              | 2023 | USA        | English  | Article          | Breast      | Treatment to Posttreatment          |                                                                                          | Qualitative Study               | -                | Patient-Related           |
| Butcon J.V <sup>92</sup>           | 2017 | China      | English  | Article          | Multiple    | Hospital to Palliative Care         |       | Literature Review               | -                | System-Related            |
| Butt C.M <sup>93</sup>             | 2012 | USA        | English  | Article          | Multiple    | Active Treatment to Survivorship    |       | Literature Review               | -                | System-Related            |
| Büyüktür A.G <sup>94</sup>         | 2015 | USA        | English  | Article          | Multiple    | Provider to Provider                |       | -                               | -                | Patient-Related           |
| Cacciamani G <sup>95</sup>         | 2021 | Brazil     | English  | Article          | Breast      | Oncology to Palliative Care         |       | Qualitative Descriptive Study   | -                | Patient- & System-Related |
| Camateros P <sup>96</sup>          | 2015 | Canada     | English  | Conference       | Multiple    | Active Treatment to Survivorship    |       | Survey                          | -                | Patient-Related           |
| Camp L <sup>97</sup>               | 2023 | USA        | English  | Article          | Breast      | Active Treatment to Survivorship    |                                                                                          | Retrospective Study             | -                | Patient-Related           |
| Canzona M.R <sup>98</sup>          | 2018 | USA        | English  | Article          | Multiple    | Curative to Palliative Care         |       | Self-Administered Mailed Survey | -                | Patient-Related           |
| Carneiro C <sup>99</sup>           | 2016 | Canada     | English  | Article          | Lymphoma    | Oncology to Primary Care            |                                                                                          | Qualitative Study               | -                | Patient-Related           |
| Carpenter-Kellett T <sup>100</sup> | 2016 | Canada     | English  | Article          | Colorectal  | Active Treatment to Survivorship    |                                                                                          | -                               | 4,004            | System-Related            |
| Carrillo G.M <sup>101</sup>        | 2018 | Columbia   | English  | Conference       | Multiple    | Hospital to Home                    |                                                                                          | National Survey                 | -                | Patient-Related           |
| Casotto V <sup>102</sup>           | 2017 | Italy      | English  | Article          | Multiple    | Multiple                            |                                                                                          | Retrospective Cohort            | -                | Patient-Related           |
| Castel O <sup>103</sup>            | 2022 | China      | English  | Article          | Multiple    | Primary Care to Palliative Care     |                                                                                          | Prospective Cohort              | 14               | Patient-Related           |
| Castro J <sup>104</sup>            | 2022 | Japan      | English  | Article          | Breast      | Multiple                            |   | Integrative Review              | -                | Patient- & System-Related |
| Castro Telles A <sup>105</sup>     | 2021 | China      | English  | Article          | Multiple    | Discharge                           |   | Prospective Cohort              | -                | Patient-Related           |
| Ceballos R <sup>106</sup>          | 2021 | Not Stated | English  | Conference       | Multiple    | Discharge                           |                                                                                        | Pilot Project                   | -                | System-Related            |
| Cha L <sup>107</sup>               | 2022 | Taiwan     | English  | Article          | Multiple    | Multiple                            |                                                                                        | Retrospective Cohort            | -                | Patient- & System-Related |
| Cha L <sup>108</sup>               | 2021 | Not Stated | English  | Conference       | Multiple    | Active Treatment to Survivorship    |                                                                                        | Care Model                      | -                | Patient-Related           |
| Chadder J <sup>109</sup>           | 2008 | Canada     | English  | Conference       | Multiple    | Active Treatment to Primary Care    |   | -                               | -                | System-Related            |
| Chafee A <sup>110</sup>            | 2017 | USA        | English  | Conference       | Multiple    | Multiple                            |   | Review                          | -                | System-Related            |
| Chan H <sup>111</sup>              | 2021 | USA        | English  | Article          | Multiple    | Multiple                            |                                                                                        | Prospective Cohort              | -                | Patient- & System-Related |
| Chao Y.H <sup>112</sup>            | 2018 | China      | Chinese  | Article          | Breast      | Active Treatment to Palliative Care |   | Integrative Review              | -                | Patient-Related           |

| Author                          | Year | Country      | Language | Publication Type | Cancer Type   | TiC                                                                       | Objectives | Study Design               | # of Patient TiC | Outcome                   |
|---------------------------------|------|--------------|----------|------------------|---------------|---------------------------------------------------------------------------|------------|----------------------------|------------------|---------------------------|
| Chaparro-Diaz L <sup>113</sup>  | 2021 | Columbia     | Spanish  | Article          | Gastric       | Discharge                                                                 | ■          | Review                     | -                | Patient- & System-Related |
| Charmillot P.A <sup>114</sup>   | 2011 | France       | French   | Article          | Multiple      | Curative to Palliative Care                                               | ■          | -                          | -                | Patient-Related           |
| Chen H <sup>115</sup>           | 2019 | UK           | English  | Article          | Multiple      | Readmission                                                               | ■          | Qualitative Interviews     | 20               | Patient-Related           |
| Chen Y <sup>116</sup>           | 2022 | China        | English  | Article          | Multiple      | Discharge                                                                 | ■ ■        | Prospective Cohort         | -                | Patient-Related           |
| Cheung W <sup>117</sup>         | 2010 | Canada       | English  | Article          | Multiple      | Multiple                                                                  | ■          | Retrospective Cohort       | -                | Patient-Related           |
| Chini C <sup>118</sup>          | 2019 | Italy        | English  | Conference       | Multiple      | Discharge                                                                 | ■          | Pilot Project              | -                | System-Related            |
| Chiou LJ <sup>119</sup>         | 2022 | Taiwan       | English  | Article          | Multiple      | Multiple                                                                  | ■          | Retrospective Cohort       | -                | Patient- & System-Related |
| Chiu M <sup>120</sup>           | 2021 | USA          | English  | Conference       | Multiple      | Active Treatment to Survivorship                                          | ■          | Care Model                 | -                | Patient-Related           |
| Choi Y <sup>121</sup>           | 2017 | USA          | English  | Article          | Multiple      | Multiple                                                                  | ■          | Retrospective Cohort       | 324              | Patient-Related           |
| Chou WY <sup>122</sup>          | 2022 | USA          | English  | Article          | Multiple      | Multiple                                                                  | ■          | Semi-Structured interviews | -                | Patient- & System-Related |
| Chow C <sup>123</sup>           | 2016 | USA          | English  | Article          | Colorectal    | Interhospital                                                             | ■          | Retrospective Cohort       | -                | Patient- & System-Related |
| Chow Z <sup>124</sup>           | 2021 | USA          | English  | Article          | Colorectal    | Diagnosis to treatment                                                    | ■ ■        | Retrospective Cohort       | -                | Patient-Related           |
| Chowdhry V <sup>125</sup>       | 2022 | USA          | English  | Conference       | Multiple      | Therapeutic Simulation to Treatment                                       | ■          | Process Model Workflow     | -                | System-Related            |
| Christiansen A.H <sup>126</sup> | 2015 | Denmark      | English  | Article          | Multiple      | Multiple                                                                  | ■ ■        |                            |                  | System-Related            |
| Chung C <sup>127</sup>          | 2018 | Switzerland  | French   | Article          | Multiple      | Multiple                                                                  | ■          | Review                     | -                | Patient-Related           |
| Ciria-Suarez L <sup>128</sup>   | 2021 | Spain        | English  | Article          | Breast        | Multiple                                                                  | ■          | Qualitative Study          | -                | Patient-Related           |
| Cloyes K <sup>129</sup>         | 2018 | USA          | English  | Article          | Multiple      | Transition to End-of-Life Care                                            | ■          | Population Cohort          | -                | Patient-Related           |
| Cohen A <sup>130</sup>          | 2020 | USA          | English  | Conference       | Gynecological | Readmission                                                               | ■          | Retrospective Chart Review | -                | Patient-Related           |
| Collie K <sup>131</sup>         | 2014 | Canada       | English  | Article          | Multiple      | Active Treatment to Survivorship                                          | ■          | -                          | -                | Patient-Related           |
| Collins A <sup>132</sup>        | 2018 | Australia    | English  | Article          | Multiple      | Transition to End-of-Life Care                                            | ■ ■        | Retrospective Cohort       | -                | Patient-Related           |
| Combrink M <sup>133</sup>       | 2016 | South Africa | English  | Article          | Multiple      | Palliative Care with Anticancer Treatment to without Anticancer Treatment | ■          | Qualitative Interviews     | 1.037            | Patient-Related           |
| Connell L.C <sup>134</sup>      | 2012 | Ireland      | English  | Conference       | Multiple      | Oncology/Hematology to Intensive Care Unit                                | ■ ■        | Prospective Database       | -                | System-Related            |
| Constine L.S <sup>135</sup>     | 2017 | USA          | English  | Conference       | Multiple      | Multiple                                                                  | ■ ■        | Randomized Control Pilot   | -                | System-Related            |
| Cook L <sup>136</sup>           | 2022 | Australia    | English  | Article          | Head and Neck | Diagnosis to treatment                                                    | ■          | Retrospective Cohort       | -                | Patient-Related           |

| Author                             | Year | Country     | Language | Publication Type | Cancer Type       | TiC                                       | Objectives                                                                                                                                                                  | Study Design                | # of Patient TiC | Outcome                   |
|------------------------------------|------|-------------|----------|------------------|-------------------|-------------------------------------------|-----------------------------------------------------------------------------------------------------------------------------------------------------------------------------|-----------------------------|------------------|---------------------------|
| Corcoran S <sup>137</sup>          | 2021 | USA         | English  | Conference       | Multiple          | Active Treatment to Follow-Up Care        |                                                                                          | -                           | -                | System-Related            |
| Cordier M <sup>138</sup>           | 2018 | France      | English  | Conference       | Multiple          | Primary to Secondary Care                 |                                                                                          | -                           | -                | System-Related            |
| Coschi C <sup>139</sup>            | 2021 | Canada      | English  | Article          | Multiple          | Oncology to Primary Care                  |                                                                                          | Prospective Survey          | -                | System-Related            |
| Cosolo L <sup>140</sup>            | 2023 | Canada      | English  | Article          | Multiple          | Diagnosis to Treatment                    |                                                                                          | Guideline                   | -                | System-Related            |
| Costa A <sup>141</sup>             | 2023 | Brazil      | English  | Article          | Head and Neck     | Diagnosis to Treatment                    |                                                                                          | Observational Study         | -                | Patient-Related           |
| Coulourides K <sup>142</sup>       | 2017 | USA         | English  | Dissertation     | Multiple          | Readmission                               |       | Program                     | 37               | System-Related            |
| Coutsouvelis J <sup>143</sup>      | 2010 | Australia   | English  | Article          | Leukemia          | Oncology/Hematology to Critical Care Unit |       | Single Case Study           | -                | Patient-Related           |
| Coyle N <sup>144</sup>             | 1987 | USA         | English  | Article          | Multiple          | Multiple                                  |       | Pre and Post                | -                | Patient-Related           |
| Crighton M.H <sup>145</sup>        | 2008 | USA         | English  | Article          | Glioblastoma      | Intensive Care Unit to End-of-Life Care   |                                                                                          | Single Case Study           | -                | Patient-Related           |
| Criticos Y <sup>146</sup>          | 2022 | Australia   | English  | Conference       | Breast            | Active Treatment to Survivorship          |                                                                                          | Modelling                   | -                | System-Related            |
| Culha I <sup>147</sup>             | 2020 | Turkey      | English  | Article          | Gynecological     | Oncology Discharge                        |                                                                                          | Non-Randomized intervention | -                | Patient- & System-Related |
| Curcio K.R <sup>148</sup>          | 2012 | USA         | English  | Article          | Multiple          | Active Treatment to Survivorship          |                                                                                          | Retrospective Cohort        | 2,246            | Patient-Related           |
| D'Angelo D <sup>149</sup>          | 2013 | Italy       | English  | Article          | Multiple          | Multiple                                  |                                                                                          | Qualitative                 | -                | System-Related            |
| Dabholkar S <sup>150</sup>         | 2021 | Australia   | English  | Conference       | Lung              | Diagnosis to Treatment                    |                                                                                          | Observational Cohort Study  | -                | Patient- & System-Related |
| Dahlke D <sup>151</sup>            | 2022 | USA         | English  | Article          | Breast            | Active Treatment to Follow-Up Care        |                                                                                          | Survey                      | -                | Patient- & System-Related |
| Dallaire C <sup>152</sup>          | 2016 | Canada      | French   | Article          | Benign Meningioma | Hospital to Home                          |       | Intervention Study          | -                | System-Related            |
| Daly R <sup>153</sup>              | 2022 | USA         | English  | Conference       | Multiple          | Oncology Center to Home                   |                                                                                          | Mobile Health Intervention  | -                | Patient- & System-Related |
| Dang S <sup>154</sup>              | 2023 | USA         | English  | Article          | Head and Neck     | Multiple                                  |       | Retrospective Review        | 165; 65          | Patient-Related           |
| Davis J.L <sup>155</sup>           | 2012 | USA         | English  | Conference       | Multiple          | Provider to Provider                      |       | Qualitative                 | -                | Patient-Related           |
| De la Garza Ramos R <sup>156</sup> | 2021 | USA         | English  | Article          | Spine             | Multiple                                  |                                                                                         | Retrospective Cohort        | -                | Patient-Related           |
| De Vlieghe K <sup>157</sup>        | 2015 | Belgium     | English  | Article          | Multiple          | Hospital to Home                          |   | Qualitative Study           | -                | System-Related            |
| Decker K <sup>158</sup>            | 2020 | Canada      | English  | Article          | Colorectal        | Readmission                               |                                                                                        | Historical Cohort Study     | 345              | Patient-Related           |
| Delisle M <sup>159</sup>           | 2023 | Canada      | English  | Article          | Multiple          | Readmission                               |                                                                                        | Survey                      | -                | Patient-Related           |
| Den Bakker D.M <sup>160</sup>      | 2018 | Netherlands | English  | Article          | Colorectal        | Multiple                                  |                                                                                        | Pilot                       | 28               | Patient-Related           |
| Deng W <sup>161</sup>              | 2020 | USA         | English  | Conference       | Lung              | Diagnosis to Treatment                    |                                                                                        | Retrospective Cohort        | -                | Patient-Related           |

| Author                         | Year | Country     | Language | Publication Type | Cancer Type | TiC                                 | Objectives                                                                                                                                                                  | Study Design                 | # of Patient TiC | Outcome                   |
|--------------------------------|------|-------------|----------|------------------|-------------|-------------------------------------|-----------------------------------------------------------------------------------------------------------------------------------------------------------------------------|------------------------------|------------------|---------------------------|
| Dennis K <sup>162</sup>        | 2011 | -           | English  | Article          | Multiple    | Active Treatment to Palliative Care |       | -                            | -                | System-Related            |
| Deol R <sup>163</sup>          | 2013 | Canada      | English  | Conference       | Multiple    | Acute Care to Primary Care          |       | Retrospective Cohort         | -                | Patient-Related           |
| Deveaux A <sup>164</sup>       | 2022 | USA         | English  | Conference       | Ovarian     | Multiple                            |       | Retrospective Cohort         | -                | Patient-Related           |
| Dicicco-Bloom B <sup>165</sup> | 2013 | USA         | English  | Article          | Multiple    | Active Treatment to Survivorship    |       | Retrospective Cohort         | -                | Patient-Related           |
| Dillon E <sup>166</sup>        | 2021 | USA         | English  | Article          | Multiple    | Oncology to Palliative Care         |                                                                                          | Mixed Methods                | -                | Patient- & System-Related |
| Doescher M <sup>167</sup>      | 2022 | USA         | English  | Article          | Multiple    | Oncology to Primary Care            |       | Cross-Sectional Survey       | -                | System-Related            |
| Dong J <sup>168</sup>          | 2020 | USA         | English  | Article          | Breast      | Diagnosis to Treatment              |                                                                                          | Retrospective Study          | -                | Patient-Related           |
| Donze J <sup>169</sup>         | 2014 | USA         | English  | Article          | Multiple    | Readmission                         |       | Prospective Pilot            | -                | System-Related            |
| Donze J <sup>170</sup>         | 2017 | USA         | English  | Article          | Multiple    | Readmission                         |                                                                                          | Case Studies                 | -                | Patient-Related           |
| Duangchan C <sup>171</sup>     | 2022 | USA         | English  | Article          | Colorectal  | Discharge                           |                                                                                          | Cross-Sectional Survey       | -                | System-Related            |
| Duffy A <sup>172</sup>         | 2018 | USA         | English  | Article          | Multiple    | Oncology to Hospice                 |                                                                                          | Prospective Pilot Initiative | -                | Patient-Related           |
| Duggleby W <sup>173</sup>      | 2005 | -           | English  | Article          | Multiple    | Multiple                            |                                                                                          | Factorial Randomized Study   | -                | System-Related            |
| Duggleby W <sup>174</sup>      | 2011 | Canada      | English  | Article          | Multiple    | Multiple                            |                                                                                          | Qualitative Interviews       | -                | System-Related            |
| Duineveld L.A <sup>175</sup>   | 2015 | Netherlands | English  | Article          | Colorectal  | Multiple                            |                                                                                          | Randomized Controlled Trial  | 1,002            | Patient-Related           |
| Dulal S <sup>176</sup>         | 2020 | Nepal       | English  | Abstract         | Multiple    | Diagnosis to Treatment              |                                                                                          | Cross-Sectional              | -                | Patient-Related           |
| Dumont I <sup>177</sup>        | 2005 | Canada      | English  | Article          | Multiple    | Multiple                            |       | -                            | -                | System-Related            |
| Durieux B <sup>178</sup>       | 2022 | USA         | English  | Article          | -           | Oncology to Palliative Care         |                                                                                          | Qualitative Study            | -                | -                         |
| Eaglehouse Y <sup>179</sup>    | 2020 | USA         | English  | Article          | Colon       | Diagnosis to Treatment              |                                                                                         | Retrospective Cohort         | -                | Patient-Related           |
| Eaglehouse Y <sup>180</sup>    | 2018 | USA         | English  | Article          | Breast      | Multiple                            |   | Administrative Modelling     | -                | System-Related            |
| Easley J <sup>181</sup>        | 2016 | Canada      | English  | Article          | Multiple    | Multiple                            |                                                                                        | Qualitative Interviews       | -                | System-Related            |
| Easley J <sup>182</sup>        | 2016 | Canada      | English  | Article          | Multiple    | Family Physician to Specialist      |   | Review                       | 6                | System-Related            |
| Economos G <sup>183</sup>      | 2019 | France      | English  | Article          | Multiple    | Nursing Home to Hospital            |                                                                                        | Mixed-Methods Questionnaire  | -                | Patient-Related           |
| Economou D <sup>184</sup>      | 2017 | USA         | English  | Article          | Multiple    | Multiple                            |   | Literature Review            | -                | Patient-Related           |
| Edwards G <sup>185</sup>       | 2020 | USA         | English  | -                | Colorectal  | Diagnosis to Treatment              |   | Retrospective Review         | 830; 201         | Patient-Related           |



| Author                     | Year | Country | Language | Publication Type | Cancer Type   | TiC                                | Objectives                                                                                                                                                                                                                                                  | Study Design                        | # of Patient TiC | Outcome         |
|----------------------------|------|---------|----------|------------------|---------------|------------------------------------|-------------------------------------------------------------------------------------------------------------------------------------------------------------------------------------------------------------------------------------------------------------|-------------------------------------|------------------|-----------------|
| Ehab J <sup>186</sup>      | 2022 | USA     | English  | Article          | Liver         | Diagnosis to Treatment             |                                                                                                                                                                          | Hybrid Type 2 Study                 | -                | System-Related  |
| Ehresman J <sup>187</sup>  | 2021 | USA     | English  | Article          | Multiple      | Hospital to Inpatient Facility     |                                                                                                                                                                          | Retrospective Cohort                | 30; 8; 18        | System-Related  |
| Ekstedt M <sup>188</sup>   | 2014 | Sweden  | English  | Article          | Breast        | Multiple                           |    | -                                   | -                | System-Related  |
| El Amrani M <sup>189</sup> | 2020 | USA     | English  | Article          | Pancreatic    | Multiple                           |                                                                                                                                                                          | Retrospective Cohort                | 1,164            | Patient-Related |
| El Hachem P <sup>190</sup> | 2023 | -       | English  | Article          | Multiple      | Multiple                           |                                                                                                                                                                          | Retrospective Cohort                | 37               | Patient-Related |
| Elias M <sup>191</sup>     | 2021 | USA     | English  | Cutis            | Multiple      | Diagnosis to Treatment             |                                                                                                                                                                          | Retrospective Cohort                | -                | Patient-Related |
| Elkins W <sup>192</sup>    | 2020 | USA     | English  | Conference       | Multiple      | Diagnosis to Treatment             |                                                                                       | Cross-Sectional Study               | -                | Patient-Related |
| Emerson M <sup>193</sup>   | 2020 | USA     | English  | Article          | Breast        | Diagnosis to Treatment             |                                                                                       | Population-Based Cohort Study       | -                | Patient-Related |
| Eng L <sup>194</sup>       | 2020 | Canada  | English  | Conference       | Multiple      | Hospital to Palliative Care        |                                                                                                                                                                          | Multicenter Study                   | -                | Patient-Related |
| Evans W.G <sup>195</sup>   | 2006 | USA     | English  | Article          | Multiple      | Multiple                           |                                                                                       | Review                              | -                | System-Related  |
| Ezendam N <sup>196</sup>   | 2014 | USA     | English  | Conference       | Multiple      | Oncology to Hospice                |                                                                                       | Cluster Randomized Controlled Trial | -                | Patient-Related |
| Fadelu T <sup>197</sup>    | 2022 | HAITI   | English  | Article          | Breast        | Multiple                           |                                                                                       | Retrospective Cohort                | 96; 141; 66      | Patient-Related |
| Fane L <sup>198</sup>      | 2023 | USA     | English  | Conference       | Melanoma      | Diagnosis to Treatment             |                                                                                       | Retrospective Cohort                | -                | Patient-Related |
| Fane L <sup>199</sup>      | 2023 | USA     | English  | Article          | Melanoma      | Diagnosis to Treatment             |                                                                                       | Cross-Sectional                     | -                | Patient-Related |
| Fareed M.M <sup>200</sup>  | 2018 | USA     | English  | Article          | Head and Neck | Multiple                           |                                                                                                                                                                          | -                                   | -                | Patient-Related |
| Faria R <sup>201</sup>     | 2017 | Canada  | English  | Conference       | Multiple      | Acute Treatment to Survivorship    |                                                                                   | Qualitative Focus Groups            | -                | Patient-Related |
| Faul L.E <sup>202</sup>    | 2012 | USA     | English  | Article          | Colorectal    | Active Treatment to Survivorship   |                                                                                   | Qualitative Interviews              | -                | Patient-Related |
| Felder T.M <sup>203</sup>  | 2019 | USA     | English  | Article          | Breast        | Multiple                           |                                                                                                                                                                        | Qualitative Interviews              | -                | System-Related  |
| Festa K <sup>204</sup>     | 2019 | USA     | English  | Article          | Breast        | Diagnosis to Treatment             |                                                                                                                                                                        | Retrospective Chart Review          | -                | Patient-Related |
| Fitch M <sup>205</sup>     | 2020 | Canada  | English  | Article          | Multiple      | Active Treatment to Follow-Up Care |                                                                                                                                                                        | Survey                              | -                | Patient-Related |
| Fitch M <sup>206</sup>     | 2021 | Canada  | English  | Article          | Multiple      | Active Treatment to Follow-Up Care |                                                                                                                                                                        | Survey                              | -                | Patient-Related |
| Fitch M.I <sup>207</sup>   | 2018 | Canada  | English  | Editorial        | Multiple      | Active Treatment to Follow-Up Care |                                                                                                                                                                        | Review                              | -                | System-Related  |
| Fong A <sup>208</sup>      | 2022 | USA     | English  | Conference       | Multiple      | Active Treatment to Survivorship   |                                                                                   | Questionnaire                       | -                | Patient-Related |

| Author                       | Year | Country   | Language | Publication Type | Cancer Type         | TiC                                | Objectives                                                                                                                                                                                                                                                        | Study Design                        | # of Patient TiC | Outcome                   |
|------------------------------|------|-----------|----------|------------------|---------------------|------------------------------------|-------------------------------------------------------------------------------------------------------------------------------------------------------------------------------------------------------------------------------------------------------------------|-------------------------------------|------------------|---------------------------|
| Forsythe L.P <sup>209</sup>  | 2013 | USA       | English  | Article          | Multiple            | Active Treatment to Follow-Up Care |                                                                                                                                                                                | Multi-Perspective Qualitative Study | -                | Patient-Related           |
| Forsythe L.P <sup>210</sup>  | 2013 | USA       | English  | Article          | Multiple            | Active Treatment to Follow-Up Care |          | Survey                              | -                | Patient-Related           |
| Fox J <sup>211</sup>         | 2016 | Australia | English  | Article          | Metastatic Melanoma | Acute Care to Palliative Care      |                                                                                                                                                                                | Retrospective Cohort                | 93               | Patient-Related           |
| Franco B.B <sup>212</sup>    | 2016 | Canada    | English  | Article          | Multiple            | Tertiary Care to Primary Care      |                                                                                             | Review                              | -                | Patient-Related           |
| Franzoi M <sup>213</sup>     | 2023 | France    | English  | Article          | Breast              | Active Treatment to Survivorship   |                                                                                                                                                                                | Mixed Methods                       | -                | Patient- & System-Related |
| Freymond M <sup>214</sup>    | 2020 | Canada    | English  | Conference       | Multiple            | Cancer Center to Hospital          |                                                                                                                                                                                | Retrospective Chart Review          | -                | Patient-Related           |
| Frosch Z <sup>215</sup>      | 2021 | USA       | English  | Article          | Multiple            | Diagnosis to Treatment             |                                                                                                                                                                                | Retrospective Cross-Sectional       | -                | Patient-Related           |
| Fu J.B <sup>216</sup>        | 2021 | USA       | English  | Article          | Brain               | Readmission                        |                                                                                                                                                                                | Retrospective Review                | 139, 15          | Patient-Related           |
| Fu J.B <sup>217</sup>        | 2023 | USA       | English  | Conference       | Brain               | Readmission                        |                                                                                                                                                                                | Retrospective Chart Review          | 107              | Patient-Related           |
| Fu J.B <sup>218</sup>        | 2013 | USA       | English  | Article          | Leukemia            | Home to Acute Care                 |                                                                                             | Retrospective Cohort                | -                | Patient-Related           |
| Fuentes A.C <sup>219</sup>   | 2017 | USA       | English  | Article          | Multiple            | Active Treatment to Primary Care   | -                                                                                                                                                                                                                                                                 | -                                   | -                | Patient-Related           |
| Funk G.F <sup>220</sup>      | 2014 | USA       | English  | Conference       | Head and Neck       | Multiple                           |                                                                                             | Survey                              | -                | System-Related            |
| Fwelo P <sup>221</sup>       | 2023 | USA       | English  | Article          | Breast              | Diagnosis to Treatment             |                                                                                                                                                                                | Retrospective Cohort                | -                | Patient-Related           |
| Gade K <sup>222</sup>        | 2021 | USA       | English  | Conference       | Breast              | Active Treatment to Survivorship   |                                                                                             | Descriptive Analysis                | 680              | Patient-Related           |
| Gadzinski A.J <sup>223</sup> | 2014 | USA       | English  | Article          | Colorectal          | Interhospital                      |    | Review                              | -                | System-Related            |
| Galati J <sup>224</sup>      | 2021 | USA       | English  | Conference       | Colorectal          | Fecal Test to Colonoscopy          |                                                                                                                                                                              | Retrospective Cohort                | -                | Patient-Related           |
| Gamblin V <sup>225</sup>     | 2021 |           | English  | Article          | Multiple            | Palliative Home Care to Hospital   |                                                                                                                                                                              | Retrospective Cohort                | 82               | Patient-Related           |
| Gandhi S <sup>226</sup>      | 2022 | Canada    | English  | Conference       | Multiple            | Multiple                           |                                                                                                                                                                              | -                                   | 204              | System-Related            |
| Gao J <sup>227</sup>         | 2022 | China     | English  | Article          | Thyroid             | Hospital to Home                   |                                                                                                                                                                              | Cross-Sectional                     | -                | Patient-Related           |
| Garg A <sup>228</sup>        | 2022 | india     | English  | Article          | Lung                | Multiple                           |                                                                                                                                                                              | Prospective Cohort                  | -                | Patient-Related           |
| Garnett D <sup>229</sup>     | 2020 | USA       | English  | Article          | Blood               | Multiple                           |    | -                                   | -                | Patient-Related           |
| Gast K.C <sup>230</sup>      | 2017 | USA       | English  | Article          | Breast              | Multiple                           |                                                                                         | Retrospective Cross-Sectional       |                  | Patient-Related           |
| Gilmore K <sup>231</sup>     | 2022 |           | English  | Conference       | Head and Neck       | Active Treatment to Survivorship   |                                                                                         | Cross-Sectional                     | -                | Patient-Related           |

| Author                          | Year | Country     | Language | Publication Type | Cancer Type   | TiC                                 | Objectives                                                                                                                                                                  | Study Design                      | # of Patient TiC | Outcome                   |
|---------------------------------|------|-------------|----------|------------------|---------------|-------------------------------------|-----------------------------------------------------------------------------------------------------------------------------------------------------------------------------|-----------------------------------|------------------|---------------------------|
| Gochett C <sup>232</sup>        | 2016 | USA         | English  | Dissertation     | Breast        | Primary Care to Survivorship        |                                                                                          | Randomized Controlled Trial       | -                | Patient-Related           |
| Goel A <sup>233</sup>           | 2020 | USA         | English  | Article          | Head and Neck | Diagnosis to Treatment              |                                                                                          | Retrospective Cohort              | -                | Patient-Related           |
| Goel A.N <sup>234</sup>         | 2019 | USA         | English  | Article          | Breast        | Diagnosis to Surgery                |       | Self-Administered Mail Survey     | -                | System-Related            |
| Goelz T <sup>235</sup>          | 2011 | Germany     | English  | Article          | Head and Neck | Oncology to Palliative Care         |                                                                                          | Randomized Controlled Trial       | -                | Patient-Related           |
| Goldenberg B.A <sup>236</sup>   | 2020 | Canada      | English  | Article          | Colorectal    | Discharge to Primary Care           |                                                                                          | Pre- & Post-Implementation Survey | -                | Patient- & System-Related |
| Goldenberg B.A <sup>237</sup>   | 2019 | Canada      | English  | Article          | Colorectal    | Hospital to Primary Care            |                                                                                          | Pre- & Post-Implementation Survey | -                | System-Related            |
| Gondhowiardjo S <sup>238</sup>  | 2021 | Indonesia   | English  | Article          | Multiple      | Diagnosis to Treatment              |                                                                                          | Cross-Sectional Study             | -                | Patient-Related           |
| Gonzalez G.M <sup>239</sup>     | 2017 | USA         | English  | Article          | Colorectal    | Discharge                           |                                                                                          | Prospective Survey                | 61               | Patient-Related           |
| Gordon G.H <sup>240</sup>       | 2003 | USA         | English  | Article          | Multiple      | Multiple                            |       | -                                 | -                | Patient-Related           |
| Gorgens U <sup>241</sup>        | 2021 | USA         | English  | Conference       | Lung          | Active Treatment to Survivorship    |                                                                                          | Modelling                         | -                | System-Related            |
| Gott M <sup>242</sup>           | 2013 | New Zealand | English  | Article          | Multiple      | Hospital to Palliative Care         |                                                                                          | Case Control                      | -                | Patient-Related           |
| Govalan R <sup>243</sup>        | 2022 | USA         | English  | Article          | Liver         | Diagnosis to Treatment              |                                                                                          | Retrospective Cohort              | 299              | Patient-Related           |
| Graboyes E <sup>244</sup>       | 2020 | USA         | English  | Article          | Head and Neck | Diagnosis to Treatment              |                                                                                          | Semi-Structured Interviews        | -                | Patient- & System-Related |
| Graboyes E <sup>245</sup>       | 2021 | USA         | English  | Article          | Head and Neck | Surgery to Radiotherapy             |                                                                                        | Single-Arm Clinical Trial         | 2                | Patient- & System-Related |
| Grainger M.N <sup>246</sup>     | 2010 | Australia   | English  | Article          | Multiple      | Active Treatment to Palliative Care |                                                                                        | Formative Evaluation Study        | 3,418            | Patient-Related           |
| Granda-Cameron C <sup>247</sup> | 2015 | USA         | English  | Article          | Multiple      | Readmission                         |                                                                                        | Case-Control                      | -                | Patient-Related           |
| Grant M <sup>248</sup>          | 2015 | Canada      | English  | Article          | Breast        | Oncology to Follow-Up Care          |   | Cross-Sectional                   | -                | Patient-Related           |
| Grass F <sup>249</sup>          | 2020 | USA         | English  | Article          | Colorectal    | Diagnosis to Treatment              |   | Retrospective Cohort              | -                | Patient-Related           |
| Grass F <sup>250</sup>          | 2021 | USA         | English  | Article          | Colorectal    | Readmission                         |                                                                                        | Retrospective Cohort              | 151              | Patient-Related           |
| Grassi L <sup>251</sup>         | 2015 | -           | English  | Editorial        | Multiple      | Active Treatment to Palliative Care |                                                                                        | Questionnaire                     | -                | System-Related            |
| Grewal K <sup>252</sup>         | 2020 | Canada      | English  | Article          | Multiple      | Multiple                            |                                                                                        | Retrospective Cohort              | -                | Patient-Related           |
| Griffiths P <sup>253</sup>      | 2013 | UK          | English  | Article          | Multiple      | Multiple                            |   | Cross-Sectional                   | -                | Patient-Related           |

| Author                      | Year | Country     | Language | Publication Type | Cancer Type   | TiC                                | Objectives                                                                                                                                                              | Study Design                               | # of Patient TiC | Outcome                   |
|-----------------------------|------|-------------|----------|------------------|---------------|------------------------------------|-------------------------------------------------------------------------------------------------------------------------------------------------------------------------|--------------------------------------------|------------------|---------------------------|
| Grunfeld E <sup>254</sup>   | 1995 | UK          | English  | Article          | Multiple      | Active Treatment to Survivorship   |   | Cross-Sectional                            | -                | Patient- & System-Related |
| Grunvald M <sup>255</sup>   | 2021 | USA         | English  | Article          | Colorectal    | Diagnosis to Treatment             |   | Retrospective Cohort                       | 179,734          | Patient-Related           |
| Guassora A.D <sup>256</sup> | 2015 | Denmark     | English  | Article          | Multiple      | Active Treatment to Primary Care   |                                                                                      | Qualitative Study                          | -                | System-Related            |
| Gupta M <sup>257</sup>      | 2015 | Canada      | English  | Conference       | Multiple      | Multiple                           |                                                                                      | Literature Review                          | -                | System-Related            |
| Gusani N <sup>258</sup>     | 2009 | USA         | English  | Article          | Multiple      | Multiple                           |                                                                                      | Qualitative Study                          | -                | Patient-Related           |
| Guvén D <sup>259</sup>      | 2020 | Turkey      | English  | Article          | Multiple      | Readmission                        |                                                                                      | Retrospective Review                       | 127              | Patient-Related           |
| Gysels M <sup>260</sup>     | 2007 | UK          | English  | Perspective      | Multiple      | Multiple                           |                                                                                      | Systematic Review                          | -                | Patient-Related           |
| Hackett F <sup>261</sup>    | 2019 | Ireland     | English  | Article          | Lymphoma      | Active Treatment to Post Treatment |                                                                                      | Cross Sectional Postal Survey              | 282              | Patient-Related           |
| Hagberg O <sup>262</sup>    | 2021 | Sweden      | English  | Commentary       | Blood         | Diagnosis to Treatment             |                                                                                      | Retrospective Review                       | -                | Patient-Related           |
| Halling C <sup>263</sup>    | 2020 | Denmark     | English  | Article          | Multiple      | Oncology to Palliative Care        |                                                                                      | Randomized Controlled Trial                | -                | Patient- & System-Related |
| Hamlish T <sup>264</sup>    | 2020 | USA         | English  | Article          | Breast        | Active Treatment                   |                                                                                      | Retrospective Chart Review                 | -                | System-Related            |
| Han J <sup>265</sup>        | 2022 | USA         | English  | Article          | Brain         | Multiple                           |                                                                                      | Retrospective Cohort                       | 1,538            | Patient-Related           |
| Han K <sup>266</sup>        | 2022 | South Korea | English  | Article          | Lung          | Multiple                           |                                                                                      | Retrospective Cohort                       | -                | Patient-Related           |
| Han K <sup>267</sup>        | 2021 | South Korea | English  | Article          | Lung          | Diagnosis to Treatment             |                                                                                      | Retrospective Cohort                       | 837; 698         | Patient-Related           |
| Hancock J <sup>268</sup>    | 2022 | USA         | English  | Article          | Multiple      | Multiple                           |                                                                                      | Cancer Program                             | -                | Patient- & System-Related |
| Hanna T <sup>269</sup>      | 2020 | Canada      | English  | Article          | Multiple      | Diagnosis to Treatment             |                                                                                      | Systematic Review and Meta-Analysis        | -                | Patient- & System-Related |
| Hanratty B <sup>270</sup>   | 2012 | UK          | English  | Article          | Lung          | Multiple                           |                                                                                      | Qualitative Study                          | -                | Patient-Related           |
| Harary M <sup>271</sup>     | 2022 | USA         | English  | Article          | Head and Neck | Readmission                        |                                                                                     | Retrospective Review                       | 15; 2; 7         | Patient-Related           |
| Harrison S.E <sup>272</sup> | 2012 | UK          | English  | Article          | Multiple      | Hospital to Follow-Up Care         |                                                                                    | Retrospective Cohort                       | -                | Patient-Related           |
| Hasegawa T <sup>273</sup>   | 2022 | Japan       | English  | Article          | Multiple      | Oncology to Palliative Care        |                                                                                    | Qualitative Study                          | -                | Patient- & System-Related |
| Hashimoto Y <sup>274</sup>  | 2022 | Japan       | English  | Article          | Multiple      | Oncology to Palliative Care        |                                                                                    | Retrospective Cohort                       | -                | System-Related            |
| Hatcher I <sup>275</sup>    | 2014 | Australia   | English  | Article          | Multiple      | Hospital to Home                   |                                                                                    | Sequential Exploratory Mixed Methods Study | -                | Patient-Related           |

| Author                       | Year | Country     | Language | Publication Type | Cancer Type            | TiC                                 | Objectives                                                                            | Study Design                 | # of Patient TiC       | Outcome                   |
|------------------------------|------|-------------|----------|------------------|------------------------|-------------------------------------|---------------------------------------------------------------------------------------|------------------------------|------------------------|---------------------------|
| Hausner D <sup>276</sup>     | 2017 | Canada      | English  | Article          | Multiple               | Multiple                            |    | Sequential Exploratory Study | -                      | System-Related            |
| Hayes L <sup>277</sup>       | 2021 | UK          | English  | Article          | Colorectal             | Diagnosis to Treatment              |    | Retrospective Cohort         | -                      | Patient-Related           |
| He Y <sup>278</sup>          | 2020 | China       | English  | Article          | Lymphoma               | Hospital to Home                    |    | Randomized Control Trial     | -                      | Patient- & System-Related |
| Hebert J <sup>279</sup>      | 2017 | Canada      | French   | Article          | Endometrial            | Active Treatment to Survivorship    |    | Qualitative Study            | -                      | Patient-Related           |
| Hebert J <sup>280</sup>      | 2017 | Canada      | English  | Article          | Endometrial            | Active Treatment to Survivorship    |    | Feasibility Pilot Study      | -                      | Patient-Related           |
| Heeg E <sup>281</sup>        | 2019 | Netherlands | English  | Article          | Breast                 | Multiple                            |    | Cross Sectional Study        | -                      | Patient-Related           |
| Heffner C <sup>282</sup>     | 2020 | USA         | English  | Article          | Multiple               | Readmission                         |    | Retrospective Review         | -                      | Patient-Related           |
| Heid C <sup>283</sup>        | 2021 | USA         | English  | Article          | Neoplasm               | Discharge                           |    | Retrospective Cohort         | 886; 121; 44; 4; 72; 1 | Patient-Related           |
| Heins M <sup>284</sup>       | 2018 | Netherlands | English  | Article          | Prostate               | Urologist to General Practitioner   |    | Review                       | -                      | Patient- & System-Related |
| Herzog L <sup>285</sup>      | 2014 | Canada      | English  | Conference       | Multiple               | Cancer Center to Primary Care       |    | Cross-Sectional Survey       | -                      | Patient-Related           |
| Heung Y <sup>286</sup>       | 2021 | USA         | English  | Article          | Multiple               | Oncology to Palliative Care         |    | Retrospective Cohort         | -                      | Patient-Related           |
| Hewage S <sup>287</sup>      | 2022 | Sri Lanka   | English  | Article          | Breast                 | Multiple                            |    | Cross-Sectional Study        | -                      | Patient-Related           |
| Higashibata T <sup>288</sup> | 2022 | Japan       | English  | Article          | Multiple               | Oncology to Palliative Care         |    | Retrospective Cohort         | -                      | Patient-related           |
| Hill K.K <sup>289</sup>      | 2010 | USA         | English  | Article          | Multiple               | Active Treatment to Hospice         |    | -                            | 984                    | Patient-Related           |
| Hoang C <sup>290</sup>       | 2020 | USA         | English  | Article          | Colorectal             | Multiple                            |    | Retrospective Cohort         | -                      | Patient-Related           |
| Hoffman A.J <sup>291</sup>   | 2014 | USA         | English  | Article          | Lung                   | Hospital to Home                    |   | Clinical Review              | -                      | Patient-Related           |
| Holland C.M <sup>292</sup>   | 2017 | USA         | English  | Article          | Multiple               | Interhospital                       |  | Retrospective Cohort         | -                      | Patient-Related           |
| Holmang S <sup>293</sup>     | 2006 | Sweden      | English  | Conference       | Multiple               | Diagnosis to Treatment              |  | Clinical Review              | -                      | Patient-Related           |
| Hopkins B <sup>294</sup>     | 2017 | Australia   | English  | Article          | Acute Myeloid Leukemia | Active Treatment to Palliative Care |  | Pilot Study                  | -                      | System-Related            |
| Hopstaken J <sup>295</sup>   | 2021 | Netherlands | English  | Article          | Pancreas               | Multiple                            |  | Pilot Study                  | -                      | Patient-Related           |
| Hopstaken J <sup>296</sup>   | 2022 | Netherlands | English  | Conference       | Pancreas               | Diagnosis to Treatment              |  | Retrospective Cohort         | -                      | Patient-Related           |
| Hoshina M <sup>297</sup>     | 2015 | Japan       | English  | Article          | Multiple               | Active Treatment to Palliative Care |  | Quality Improvement Review   | -                      | Patient-Related           |
| Howie C <sup>298</sup>       | 2019 | UK          | English  | Conference       | Lung                   | Multiple                            | -                                                                                     | Process Map                  | -                      | System-Related            |

| Author                            | Year | Country      | Language | Publication Type | Cancer Type      | TiC                                           | Objectives                                                                            | Study Design                    | # of Patient TiC | Outcome                   |
|-----------------------------------|------|--------------|----------|------------------|------------------|-----------------------------------------------|---------------------------------------------------------------------------------------|---------------------------------|------------------|---------------------------|
| Hsueh M <sup>299</sup>            | 2016 | USA          | English  | Article          | Multiple         | Inpatient to Outpatient Care                  |    | Pilot Study                     | -                | Patient-Related           |
| Huang M <sup>300</sup>            | 2021 | USA          | English  | Conference       | Prostate         | Active Surveillance to Definitive Therapy     |    | Program Evaluation              | -                | Patient-Related           |
| Huang R <sup>301</sup>            | 2022 | Taiwan       | English  | Article          | Multiple         | Hospital to Home                              |    | Cross-Sectional Study           | 91,30            | Patient-Related           |
| Huenerberg K.J <sup>302</sup>     | 2018 | USA          | English  | Article          | Breast           | Radiation to Follow-Up Care                   |    | Retrospective Cohort            | -                | Patient-Related           |
| Hughes L <sup>303</sup>           | 2000 | USA          | English  | Article          | Multiple         | Hospital to Home                              |    | Descriptive Study               | -                | System-Related            |
| Hui D <sup>304</sup>              | 2010 | USA          | English  | Article          | Multiple         | Discharge from Acute Palliative Care          |    | Retrospective Cohort            | -                | Patient-Related           |
| Hulbert-Williams N <sup>305</sup> | 2021 | UK           | English  | Article          | Multiple         | Oncology to Palliative Care                   |    | Single-Case Experimental Design | -                | Patient-Related           |
| Hunter A <sup>306</sup>           | 2020 | South Africa | English  | Article          | Multiple         | Diagnosis to Treatment                        |    | Literature Review               | -                | Patient-Related           |
| Hunter S <sup>307</sup>           | 2017 | Canada       | English  | Conference       | Multiple         | Oncology to Primary Care                      |    | Historical Prospective Cohort   | -                | Patient-Related           |
| Hussain T <sup>308</sup>          | 2016 | USA          | English  | Article          | Colorectal       | Surgery to Primary Care                       |    | Literature Review               | -                | System-Related            |
| Hutchinson T <sup>309</sup>       | 2021 | USA          | English  | Article          | Gastrointestinal | Active Treatment to Survivorship              |    | Literature Review               | -                | Patient- & System-Related |
| Hutten R <sup>310</sup>           | 2021 | USA          | English  | Conference       | Multiple         | Diagnosis and Other Treatment to Radiotherapy |    | Retrospective Cohort            | -                | Patient-Related           |
| Huynh L <sup>311</sup>            | 2022 | Canada       | English  | Conference       | Multiple         | Readmission                                   |    | interrupted Time-Series         | -                | Patient-Related           |
| Hwang I <sup>312</sup>            | 2022 | South Korea  | English  | Conference       | Multiple         | Multiple                                      |    | Retrospective Cohort            | 891,210          | Patient-Related           |
| Hwang S <sup>313</sup>            | 2023 | USA          | English  | Article          | Multiple         | Home to Hospital                              |    | Retrospective Cohort            | 2460             | Patient-Related           |
| Iachina M <sup>314</sup>          | 2017 | Denmark      | English  | Article          | Lung             | Interhospital                                 |    | Prospective Cohort              | -                | System-Related            |
| Ikeguchi R <sup>315</sup>         | 2021 | Japan        | English  | Article          | Multiple         | Discharge                                     |    | Retrospective Cohort            | -                | Patient-Related           |
| Im J <sup>316</sup>               | 2023 | USA          | English  | Article          | Multiple         | Oncology to Palliative Care                   |  | Retrospective Chart Review      | -                | Patient-Related           |
| Indoe J <sup>317</sup>            | 2021 | UK           | English  | Article          | Head and Neck    | Hospital to Home                              |  | Pilot Study                     | -                | Patient-Related           |
| Ishimoto H <sup>318</sup>         | 2021 | Japan        | English  | Article          | Multiple         | Discharge                                     |  | Cross-Sectional Survey Study    | -                | Patient-Related           |
| Itamura K <sup>319</sup>          | 2020 | USA          | English  | Conference       | Head and Neck    | Diagnosis to Treatment                        |  | Retrospective Cohort            | -                | Patient-Related           |
| Jackson B <sup>320</sup>          | 2023 | USA          | English  | Conference       | Breast           | Diagnosis to Treatment                        |  | Retrospective Cohort            | -                | Patient-Related           |

| Author                       | Year | Country     | Language | Publication Type | Cancer Type            | TiC                                                 | Objectives                                                                            | Study Design                                      | # of Patient TiC | Outcome                   |
|------------------------------|------|-------------|----------|------------------|------------------------|-----------------------------------------------------|---------------------------------------------------------------------------------------|---------------------------------------------------|------------------|---------------------------|
| Jackson M.L <sup>321</sup>   | 2018 | USA         | English  | Article          | Multiple               | Hospital to Nursing Facility                        |    | Literature Review                                 | -                | Patient-Related           |
| Jain B <sup>322</sup>        | 2022 | USA         | English  | Article          | Prostate               | Diagnosis to Treatment                              |    | Retrospective Cohort                              | -                | Patient-Related           |
| Janmohamed N <sup>323</sup>  | 2021 | Canada      | English  | Conference       | Thyroid                | Oncology to Primary Care                            |    | Survey                                            | -                | System-Related            |
| Jayadevappa R <sup>324</sup> | 2023 | USA         | English  | Article          | Prostate               | Multiple                                            |    | Retrospective Cohort                              | -                | Patient-Related           |
| Jeon S <sup>325</sup>        | 2019 | USA         | English  | Article          | Breast                 | Multiple                                            |    | Cross Sectional Mixed Methods Study               | -                | System-Related            |
| Johnston D <sup>326</sup>    | 2013 | USA         | English  | Article          | Multiple               | Multiple                                            |    | Prospective Longitudinal Randomized Control Study |                  | Patient-Related           |
| Jones J <sup>327</sup>       | 2012 | Canada      | English  | Article          | Endometrial            | Acute Treatment to Follow-Up Care                   |    | Cross-Sectional Mixed-Methods                     | 143              | Patient-Related           |
| Jongman E <sup>328</sup>     | 2021 | UK          | English  | Conference       | Blood                  | Discharge                                           | -                                                                                     | Clinical Audit                                    | -                | System-Related            |
| Joo S <sup>329</sup>         | 2020 | Iran        | English  | Article          | Multiple               | Hospital to Home                                    |    | Clinical Trial                                    | -                | Patient-Related           |
| Juarez G <sup>330</sup>      | 2013 | USA         | English  | Article          | Breast                 | Active Treatment to Survivorship                    |    | Qualitative Study                                 | -                | Patient-Related           |
| Jung E <sup>331</sup>        | 2022 | South Korea | English  | Article          | Multiple               | Palliative Care to Hospice                          |    | Cross-Sectional                                   | -                | Patient-Related           |
| Kamat S <sup>332</sup>       | 2015 | USA         | English  | Article          | Multiple               | Intensive Care Unit to Oncology Intensive Care Unit |    | Retrospective Cohort                              | -                | Patient-Related           |
| Kamath P <sup>333</sup>      | 2021 | USA         | English  | Abstract         | Epithelial Ovarian     | -                                                   |    | Cohort                                            | -                | Patient- & System-Related |
| Kamradt M <sup>334</sup>     | 2015 | Germany     | English  | Article          | Colorectal             | Multiple                                            |    | Qualitative Study                                 | -                | System-Related            |
| Kantsiper M <sup>335</sup>   | 2009 | USA         | English  | Article          | Breast                 | Multiple                                            |  | Qualitative Study                                 | -                | System-Related            |
| Karius D <sup>336</sup>      | 2021 | USA         | English  | Article          | Not Specified          | -                                                   |  | Case Study                                        | -                | System-Related            |
| Karush J <sup>337</sup>      | 2023 | USA         | English  | Article          | Lung Cancer            | Non-Home Discharge                                  |  | Cohort                                            | -                | Patient- & System-Related |
| Kaur J <sup>338</sup>        | 2011 | india       | English  | Article          | Multiple               | Curative Care to Palliative Care                    |  | Qualitative Study                                 | -                | Patient-Related           |
| Ke Y <sup>339</sup>          | 2020 | Singapore   | English  | Conference       | Not Specified          | -                                                   |  | Quasi-Experimental                                | -                | Patient- & System-Related |
| Keenan K <sup>340</sup>      | 2019 | USA         | English  | Conference       | Breast                 | Nurse Practitioner to Primary Care                  |  | Mixed-Methods                                     | -                | Patient-Related           |
| Keesing S <sup>341</sup>     | 2018 | Australia   | English  | Article          | Breast                 | Multiple                                            |  | Qualitative Study                                 | -                | Patient-Related           |
| Keesing S <sup>342</sup>     | 2019 | Australia   | English  | Article          | Breast                 | Multiple                                            |  | Mixed-Methods                                     | -                | Patient-Related           |
| Keinanen A <sup>343</sup>    | 2022 | Finland     | English  | Conference       | Oral Epidermoid Cancer | Referral Patterns                                   |  | Retrospective Cohort                              | -                | Patient-Related           |

| Author                           | Year | Country     | Language | Publication Type | Cancer Type                    | TiC                                             | Objectives                                                                            | Study Design                                                         | # of Patient TiC | Outcome                   |
|----------------------------------|------|-------------|----------|------------------|--------------------------------|-------------------------------------------------|---------------------------------------------------------------------------------------|----------------------------------------------------------------------|------------------|---------------------------|
| Kelly D <sup>344</sup>           | 2015 | USA         | English  | Conference       | Multiple                       | Multiple                                        |    | Survey                                                               | -                | System-Related            |
| Kelly K.N <sup>345</sup>         | 2016 | England     | English  | Article          | Colorectal                     | Hospital to Home                                |    | Retrospective Cohort                                                 | -                | Patient-Related           |
| Keng C <sup>346</sup>            | 2021 | Canada      | English  | Article          | Colorectal                     | -                                               |    | Qualitative Interpretative Description Using Latent Content Analysis | -                | Patient-Related           |
| Kenney-Lueptow, J <sup>347</sup> | 2020 | USA         | English  | Article          | Multiple                       | Hospital to Home                                |    | Review                                                               | -                | Patient-Related           |
| Kerekes D <sup>348</sup>         | 2022 | -           | English  | Conference       | Hepatopancreatobiliary Cancers | Time to Treatment Initiation                    |    | Retrospective Cohort                                                 | -                | Patient- & System-Related |
| Khalid M <sup>349</sup>          | 2022 | Pakistan    | English  | Conference       | Breast Cancer                  | Treatment Delay                                 |    | Cross-Sectional                                                      | -                | Patient-Related           |
| Khanna S <sup>350</sup>          | 2015 | USA         | English  | Conference       | Breast Cancer                  | Diagnosis to Treatment                          |    | Prospective Longitudinal Case Study                                  | -                | Patient-Related           |
| Kim Y.A <sup>351</sup>           | 2023 | South Korea | English  | Article          | Multiple                       | -                                               |    | Quasi-Experimental                                                   | -                | Patient-Related           |
| Kim Y.A <sup>352</sup>           | 2021 | South Korea | English  | Article          | Multiple                       | -                                               |    | Cross-Sectional                                                      | -                | Patient-Related           |
| Kinahan K.E <sup>353</sup>       | 2015 | USA         | English  | Article          | Multiple                       | Multiple                                        |    | Case Report                                                          | -                | Patient-Related           |
| Kirkland S <sup>354</sup>        | 2020 | Canada      | English  | Article          | Multiple                       | -                                               |    | Scoping Review                                                       | -                | Patient- & System-Related |
| Kitta A <sup>355</sup>           | 2021 | Austria     | English  | Article          | Not Specified                  | Curative to Palliative Care                     |    | Qualitative Interviews                                               | -                | Patient-Related           |
| Klimmek R <sup>356</sup>         | 2013 | USA         | English  | Dissertation     | Multiple                       | Active Treatment to Posttreatment               |   | Retrospective Cohort                                                 | -                | Patient-Related           |
| Knisely M.R <sup>357</sup>       | 2015 | USA         | English  | Article          | Oral                           | Multiple                                        |  | Case Report                                                          | -                | Patient-Related           |
| Knowlton S <sup>358</sup>        | 2022 | USA         | English  | Article          | Brain Cancer                   | Inpatient Rehabilitation Facility to Acute Care |  | Retrospective Chart Review                                           | -                | Patient-Related           |
| Ko E <sup>359</sup>              | 2021 | USA         | English  | Article          | Breast Cancer                  | Active Treatment to Primary Care                |  | Qualitative Interviews                                               | -                | Patient-Related           |
| Ko N.Y <sup>360</sup>            | 2017 | USA         | English  | Conference       | Breast                         | Diagnosis to Treatment                          |  | Retrospective Cohort                                                 | -                | Patient-Related           |
| Ko W <sup>361</sup>              | 2014 | Belgium     | English  | Article          | Multiple                       | Multiple                                        |  | Longitudinal Interview                                               | -                | Patient-Related           |
| Koinberg I <sup>362</sup>        | 2018 | England     | English  | Article          | Head and Neck                  | Healthy to Diagnosis                            |  | Qualitative Study                                                    | 858              | Patient-Related           |
| Kopczynska M <sup>363</sup>      | 2022 | UK          | English  | Article          | Multiple                       | Hospital To Home with Paraenteral Nutrition     |  | Retrospective Cohort                                                 | -                | Patient-Related           |
| Koshinawa T <sup>364</sup>       | 2006 | Japan       | Japanese | Article          | Multiple                       | Active Treatment to Palliative Care             |  | -                                                                    | -                | Patient- & System-Related |



| Author                        | Year | Country   | Language | Publication Type | Cancer Type   | TiC                                                  | Objectives                                                                                                                                                                                                                                                  | Study Design                               | # of Patient TiC | Outcome                   |
|-------------------------------|------|-----------|----------|------------------|---------------|------------------------------------------------------|-------------------------------------------------------------------------------------------------------------------------------------------------------------------------------------------------------------------------------------------------------------|--------------------------------------------|------------------|---------------------------|
| Krishnasamy, M <sup>365</sup> | 2007 | England   | English  | Article          | Lung          | Multiple                                             |                                                                                                                                                                          | Explanatory Sequential Mixed Methods Study | -                | Patient-Related           |
| Kucharczuk C <sup>366</sup>   | 2022 | USA       | English  | Article          | Not Specified | -                                                    |                                                                                       | Quality Improvement                        | -                | Patient- & System-Related |
| Kukar M <sup>367</sup>        | 2014 | USA       | English  | Article          | Breast        | Active Treatment to Follow-Up Care                   |                                                                                       | Prospective Cohort                         | -                | Patient-Related           |
| Kumar A <sup>368</sup>        | 2019 | india     | English  | Article          | Breast        | Diagnosis to Treatment                               |                                                                                                                                                                          | Mixed-Methods                              | -                | Patient-Related           |
| Kumar R <sup>369</sup>        | 2022 | USA       | English  | Article          | Bladder       | Discharge                                            |                                                                                                                                                                          | Retrospective Cohort                       | -                | Patient-Related           |
| Kusajima J <sup>370</sup>     | 2009 | Japan     | English  | Article          | Multiple      | Active Treatment to Specialized Home Palliative Care |                                                                                       | Descriptive Study                          | -                | Patient-Related           |
| Kvale E.A <sup>371</sup>      | 2016 | USA       | English  | Article          | Breast        | Specialty Cancer Care to Primary Care                |                                                                                       | Cross-Sectional Survey                     | -                | Patient-Related           |
| Kwan J <sup>372</sup>         | 2019 | Canada    | English  | Article          | Lung          | -                                                    |                                                                                                                                                                          | Retrospective Cohort                       | -                | Patient- & System-Related |
| Kyte K <sup>373</sup>         | 2019 | Norway    | English  | Article          | Lung          | Hospital to Home                                     |                                                                                                                                                                          | Prospective Cohort                         | 932              | Patient-Related           |
| Ladaique A <sup>374</sup>     | 2021 | France    | English  | Article          | Breast        | Active Treatment to Survivorship                     |                                                                                                                                                                          | Program Evaluation                         | -                | Patient- & System-Related |
| Lafferty J <sup>375</sup>     | 2011 | USA       | English  | Article          | Breast        | Multiple                                             |    | Prospective Cohort                         | -                | Patient-Related           |
| Lafferty M <sup>376</sup>     | 2020 | USA       | English  | Article          | Multiple      | Diagnosis to Treatment                               |    | Sequential, Mixed-Methods Study            | -                | Patient- & System-Related |
| Lage D.E <sup>377</sup>       | 2020 | USA       | English  | Article          | Multiple      | End-of-Life Care                                     |                                                                                                                                                                          | Retrospective Cohort                       | -                | Patient-Related           |
| Lage D.E <sup>378</sup>       | 2022 | USA       | English  | Conference       | Multiple      | Hospital to Home                                     |                                                                                   | Single-Arm Pilot Trial                     | -                | Patient-Related           |
| Lage D.E <sup>379</sup>       | 2022 | USA       | English  | Conference       | Multiple      | Hospital to Home                                     |                                                                                   | Pilot Program                              | -                | Patient- & System-Related |
| Lage D.E <sup>380</sup>       | 2017 | USA       | English  | Article          | Multiple      | Hospital to Hospice/Home/Care Facility               |                                                                                   | Prospective Cohort                         | -                | Patient-Related           |
| Lage D.E <sup>381</sup>       | 2018 | USA       | English  | Article          | Multiple      | Hospital to Hospice/Home/Care Facility               |                                                                                   | Prospective Cohort                         | -                | Patient-Related           |
| Lakomkin N <sup>382</sup>     | 2017 | Israel    | English  | Article          | Brain         | Discharge                                            |                                                                                   | Prospective Cohort                         | -                | System-Related            |
| Larkin P <sup>383</sup>       | 2007 | Ireland   | English  | Article          | Multiple      | Palliative Care to Terminal Care                     |                                                                                                                                                                        | Qualitative Study                          | -                | Patient-Related           |
| Lau M <sup>384</sup>          | 2015 | Canada    | English  | Conference       | Multiple      | Oncology to Primary Care                             |                                                                                                                                                                        | Questionnaire                              | -                | Patient- & System-Related |
| Laurent-Badr Q <sup>385</sup> | 2020 | France    | English  | Article          | Pancreas      | Multiple                                             |                                                                                                                                                                        | Retrospective Cohort                       | -                | Patient-Related           |
| Lawler S <sup>386</sup>       | 2011 | Australia | English  | Article          | Breast        | Active Treatment to Follow-Up Care                   |                                                                                                                                                                        | Qualitative Study                          | 5903             | System-Related            |
| Lawler S <sup>387</sup>       | 2012 | Australia | English  | Conference       | Breast        | Active Treatment to Follow-Up Care                   |                                                                                                                                                                        | Qualitative Study                          | -                | System-Related            |

| Author                     | Year | Country            | Language | Publication Type     | Cancer Type                  | TiC                                     | Objectives                                                                            | Study Design                             | # of Patient TiC | Outcome                   |
|----------------------------|------|--------------------|----------|----------------------|------------------------------|-----------------------------------------|---------------------------------------------------------------------------------------|------------------------------------------|------------------|---------------------------|
| Lawrenz J <sup>388</sup>   | 2020 | USA                | English  | Article              | Bone Sarcoma                 | Time to Treatment                       |    | Retrospective Cohort                     | -                | Patient-Related           |
| Lawson B <sup>389</sup>    | 2006 | Canada             | English  | Article              | Multiple                     | Multiple                                |    | Case Study                               | -                | System-Related            |
| Leach C <sup>390</sup>     | 2017 | USA                | English  | Article              | Multiple                     | Active Treatment to Posttreatment       |    | Quasi Experimental Implementation        | -                | System-Related            |
| Lee S.J.C <sup>391</sup>   | 2016 | USA                | English  | Article              | Colorectal                   | Oncology to Primary Care                |    | -                                        | -                | System-Related            |
| Lee S.J.C <sup>392</sup>   | 2018 | USA                | English  | Article              | Multiple                     | Oncology to Primary Care                |    | Retrospective Cohort                     | -                | Patient-Related           |
| Lees B <sup>393</sup>      | 2020 | USA                | English  | Conference           | Gynecological                | Hospital to Home                        |    | Survey                                   | -                | Patient-Related           |
| Lefebvre G <sup>394</sup>  | 2016 | France             | French   | Article              | Multiple                     | Multiple                                |    | -                                        | -                | Patient-Related           |
| Lefkowitz D <sup>395</sup> | 2022 | USA                | English  | Article              | Breast                       | Active Treatment to Survivorship        |    | Qualitative Study                        | -                | Patient-Related           |
| Leng J <sup>396</sup>      | 2020 | Nigeria            | English  | Article              | Multiple                     | Multiple                                |    | Cross-Sectional                          | -                | Patient- & System-Related |
| Lennox G <sup>397</sup>    | 2020 | Canada             | English  | Article              | Multiple                     | Hospital to Home                        |    | Retrospective Cohort                     | 182              | Patient-Related           |
| Li H <sup>398</sup>        | 2022 | China              | English  | Letter to the Editor | Rectal Cancer                | Hospital to Home                        |    | Pragmatic Trial                          | -                | Patient-Related           |
| Li K <sup>399</sup>        | 2023 | China              | English  | Article              | Thoracic Esophageal Cancer   | Hospital to Home                        |    | Retrospective Cohort                     | -                | Patient- & System-Related |
| Li L.T <sup>400</sup>      | 2015 | USA                | English  | Article              | Colorectal                   | Multiple                                |    | Self-Report Survey                       | -                | Patient-Related           |
| Liao T <sup>401</sup>      | 2022 | China              | English  | Article              | Nasopharyngeal Carcinoma     | Radiotherapy Department at Hospital     |    | Randomized Controlled Trial              | -                | Patient-Related           |
| Liaquat A <sup>402</sup>   | 2021 | Pakistan           | English  | Article              | Oral Squamous Cell Carcinoma | Diagnosis to Treatment                  |   | Prospective Cohort                       | -                | Patient- & System-Related |
| Lin C <sup>403</sup>       | 2020 | USA                | English  | Article              | Head and Neck Cancer         | Referral to Palliative OutPatient- Care |  | Case Series With Planned Data Collection | -                | Patient-Related           |
| Lin Y <sup>404</sup>       | 2021 | USA                | English  | Conference           | Lung Cancer                  | Diagnosis to Treatmnt                   |  | Quality Improvement                      | -                | System-Related            |
| Liska A <sup>405</sup>     | 2020 | Canada             | English  | Article              | Breast Cancer                | Transition Out of Radiation Therapy     |  | Qualitative Interviews                   | -                | Patient-Related           |
| Lithner M <sup>406</sup>   | 2015 | Sweden             | English  | Article              | Colorectal                   | Discharge                               |  | Qualitative Study                        | -                | System-Related            |
| Lizama N <sup>407</sup>    | 2015 | Australia          | English  | Article              | Multiple                     | Multiple                                |  | Retrospective Cohort                     | 3.69             | Patient-Related           |
| Lokanatha D <sup>408</sup> | 2020 | Bangalore          | English  | Article              | Multiple                     | Diagnosis to Treatment                  |  | Prospective Cohort                       | -                | Patient- & System-Related |
| Lombe D <sup>409</sup>     | 2023 | Sub-Saharan Africa | English  | Article              | Multiple                     | Symptoms to Treatment                   |  | Systematic Review                        | -                | Patient- & System-Related |

| Author                         | Year | Country      | Language | Publication Type | Cancer Type                           | TiC                                                     | Objectives                                                                                                                                                                  | Study Design                             | # of Patient TiC | Outcome                   |
|--------------------------------|------|--------------|----------|------------------|---------------------------------------|---------------------------------------------------------|-----------------------------------------------------------------------------------------------------------------------------------------------------------------------------|------------------------------------------|------------------|---------------------------|
| Lorenz F <sup>410</sup>        | 2022 | USA          | English  | Article          | Head and Neck Squamous Cell Carcinoma | Diagnosis to Treatment                                  |                                                                                          | Retrospective Cohort                     | -                | Patient- & System-Related |
| Losk K <sup>411</sup>          | 2013 | USA          | English  | Conference       | Breast                                | Surgery to Medical Oncology                             |                                                                                          | -                                        | -                | Patient-Related           |
| Lowey S <sup>412</sup>         | 2017 | USA          | English  | Article          | Lung                                  | Multiple                                                |                                                                                          | -                                        | -                | Patient-Related           |
| Lundereng E <sup>413</sup>     | 2020 | Norway       | English  | Article          | Not Specified                         | Hospital to Home (Inpatients Receiving Palliative Care) |                                                                                          | Qualitative Study                        | -                | System-Related            |
| Lycan T <sup>414</sup>         | 2023 | USA          | English  | Article          | Lung                                  | Oncology to Palliative Care                             |                                                                                          | Retrospective Cohort                     | -                | Patient-Related           |
| MacArtney J <sup>415</sup>     | 2015 | Australia    | English  | Article          | Multiple                              | Active Treatment to Palliative Care                     |                                                                                          | Retrospective Cohort                     | -                | Patient-Related           |
| Madsen R <sup>416</sup>        | 2019 | Denmark      | English  | Article          | Multiple                              | Multiple                                                | -                                                                                                                                                                           | Guideline                                | -                | Patient- & System-Related |
| Magnoli M <sup>417</sup>       | 2021 | Scotland     | English  | Conference       | Oesophageal                           | Multiple                                                |                                                                                          | Systematic Review                        | -                | Patient-Related           |
| Magrowski L <sup>418</sup>     | 2021 | Poland       | English  | Article          | Brain                                 | Surgery to Radiochemotherapy                            |                                                                                          | Retrospective Cohort                     | -                | Patient-Related           |
| Maiedema B <sup>419</sup>      | 2004 | Canada       | English  | Article          | Multiple                              | Secondary Care to Tertiary Care                         |       | Qualitative Study                        | -                | System-Related            |
| Majeed I <sup>420</sup>        | 2022 | Pakistan     | English  | Article          | Breast                                | Multiple                                                |                                                                                          | Cross-Sectional                          | -                | Patient-Related           |
| Malam S <sup>421</sup>         | 2020 | Canada       | English  | Article          | Breast                                | Active Treatment/Radiation to Survivorship              |                                                                                          | Pilot Study                              | -                | Patient- & System-Related |
| Malebranche M <sup>422</sup>   | 2020 | Switzerland  | English  | Article          | Multiple                              | Multiple                                                | -                                                                                                                                                                           | Commentary                               | -                | Patient- & System-Related |
| Malloy K.M <sup>423</sup>      | 2017 | USA          | English  | Article          | Head and Neck                         | Multiple                                                |       | Retrospective Cohort                     | 884              | Patient-Related           |
| Maloney C.H <sup>424</sup>     | 1992 | USA          | English  | Article          | Multiple                              | Hospital to Home                                        |       | Longitudinal Administrative Study        | -                | Patient-Related           |
| Manzano J <sup>425</sup>       | 2022 | USA          | English  | Article          | Multiple                              | Readmission                                             |                                                                                          | Observational Cohort                     | 51,078           | Patient- & System-Related |
| Manzano J.M <sup>426</sup>     | 2015 | USA          | English  | Article          | Multiple                              | Readmission                                             |                                                                                          | -                                        | -                | Patient-Related           |
| Mapanga W <sup>427</sup>       | 2021 | South Africa | English  | Article          | Lung                                  | Diagnosis to Treatment                                  |       | Mixed-Methods Study                      | -                | System-Related            |
| Marcickiewicz J <sup>428</sup> | 2022 | Sweden       | English  | Article          | Endometrial                           | Diagnosis to Treatment                                  |                                                                                          | Historical Population-Based Cohort Study | 5535             | Patient-Related           |
| Marcus L.P <sup>429</sup>      | 2014 | USA          | English  | Conference       | Brain                                 | Readmission                                             |                                                                                          | Pilot Randomized Controlled Study        | -                | Patient-Related           |
| Margariti C <sup>430</sup>     | 2020 | UK           | English  | Conference       | Prostate                              | Active Treatment to Follow-Up Care                      |       | Qualitative Study                        | -                | System-Related            |
| Marston C <sup>431</sup>       | 2023 | Australia    | English  | Article          | Multiple                              | Hospital to Home                                        |   | Qualitative Study                        | -                | Patient- & System-Related |

| Author                        | Year | Country     | Language | Publication Type | Cancer Type    | TiC                                             | Objectives                                                                                                                                                                  | Study Design                                   | # of Patient TiC | Outcome                   |
|-------------------------------|------|-------------|----------|------------------|----------------|-------------------------------------------------|-----------------------------------------------------------------------------------------------------------------------------------------------------------------------------|------------------------------------------------|------------------|---------------------------|
| Marwah R <sup>432</sup>       | 2022 | Australia   | English  | Article          | Head and Neck  | Diagnosis to Surgery                            |                                                                                          | Retrospective Cohort                           | -                | Patient-Related           |
| Mateo A.M <sup>433</sup>      | 2018 | USA         | English  | Article          | Breast         | Diagnosis to Treatment                          |       | Retrospective Review                           | -                | Patient-Related           |
| Mateo A.M <sup>434</sup>      | 2020 | USA         | English  | Article          | Breast         | Diagnosis to Surgery                            |                                                                                          | Retrospective Review                           | -                | Patient- & System-Related |
| Mateshaytis J <sup>435</sup>  | 2022 | Canada      | English  | Article          | Endometrial    | Same Day Discharge From Hospital to Home        |                                                                                          | Quality Improvement                            | -                | System-Related            |
| Mattei L <sup>436</sup>       | 2022 | USA         | English  | Conference       | Uterine        | Diagnosis to Surgery                            |                                                                                          | Retrospective Cohort                           | -                | Patient- & System-Related |
| Mattessich N <sup>437</sup>   | 2020 | USA         | English  | Article          | Colorectal     | Hospital to Home                                |                                                                                          | Quality Improvement                            | -                | System-Related            |
| Matthai A <sup>438</sup>      | 2021 | USA         | English  | Conference       | Multiple       | Multiple                                        |                                                                                          | Retrospective Cohort                           | -                | System-Related            |
| Mattos L <sup>439</sup>       | 2023 | -           | English  | Article          | Not Specified  | Hospital to Home                                |                                                                                          | Systematic Review                              | -                | System-Related            |
| Mayer D <sup>440</sup>        | 2015 | USA         | English  | Article          | Non-Metastatic | Active Treatment to Primary Care                |       | Pilot Randomized Controlled Trial              | -                | Patient-Related           |
| Mayer D <sup>441</sup>        | 2012 | USA         | English  | Article          | Multiple       | Active Treatment to Follow-Up Care              |                                                                                          | Program                                        | -                | System-Related            |
| Mayer D <sup>442</sup>        | 2015 | USA         | English  | Article          | Multiple       | Multiple                                        |                                                                                          | Qualitative Study                              | -                | Patient-Related           |
| Mazariego C <sup>443</sup>    | 2021 | Australia   | English  | Article          | Prostate       | Survivorship to Long-Term Survivorship          |                                                                                          | Qualitative Study                              | -                | Patient-Related           |
| McBride A <sup>444</sup>      | 2018 | USA         | English  | Article          | Multiple       | Chemotherapy to Outpatient Setting              |                                                                                          | Reflective Case Study                          | -                | System-Related            |
| Meiklejohn J <sup>445</sup>   | 2020 | Australia   | English  | Article          | Multiple       | Active Treatment to Survivorship                |                                                                                          | Qualitative Study                              | -                | Patient-Related           |
| Meiklejohn J.A <sup>446</sup> | 2017 | Australia   | English  | Article          | Multiple       | Multiple                                        |     | Qualitative Study                              | -                | Patient-Related           |
| Mercadante S <sup>447</sup>   | 2023 | USA         | English  | Article          | Multiple       | Admission to Acute Palliative Care Units        |                                                                                        | Scoping Review                                 | -                | Patient-Related           |
| Mercadante S <sup>448</sup>   | 2022 | Italy       | English  | Article          | Multiple       | Admission to Hospice                            |   | Prospective Cohort                             | -                | Patient-Related           |
| Metcalfe C <sup>449</sup>     | 2022 | UK          | English  | Article          | Head and Neck  | Multiple                                        |   | Prospective Service Evaluation                 | -                | Patient- & System-Related |
| Mettias B <sup>450</sup>      | 2022 | UK          | English  | Article          | Head and Neck  | Oncology Center Referrals to Outpatient Clinics |   | Cross-Sectional Study with a Systematic Review | -                | Patient- & System-Related |
| Metzger K <sup>451</sup>      | 2021 | Germany     | English  | Article          | Head and Neck  | Diagnosis to Surgery                            |                                                                                        | Retrospective Cohort                           | -                | Patient-Related           |
| Meyer A <sup>452</sup>        | 2009 | New Zealand | English  | Article          | Breast         | Active Treatment to Palliative Care             |                                                                                        | -                                              | -                | Patient-Related           |

| Author                          | Year | Country   | Language | Publication Type | Cancer Type   | TiC                                        | Objectives                                                                                                                                                                                                                                                        | Study Design                            | # of Patient TiC | Outcome                   |
|---------------------------------|------|-----------|----------|------------------|---------------|--------------------------------------------|-------------------------------------------------------------------------------------------------------------------------------------------------------------------------------------------------------------------------------------------------------------------|-----------------------------------------|------------------|---------------------------|
| Mian Ng S <sup>453</sup>        | 2020 | Australia | English  | Conference       | Lung          | Abnormal Imaging Result to Specialist Care |                                                                                                                                                                                | Retrospective Cohort                    | -                | System-Related            |
| Michiels E <sup>454</sup>       | 2007 | Belgium   | English  | Article          | Multiple      | Multiple                                   |                                                                                                                                                                                | Observational Study                     | -                | System-Related            |
| Mielczarek L <sup>455</sup>     | 2020 | Poland    | English  | Article          | Bladder       | Multiple                                   |                                                                                                                                                                                | Cross-Sectional                         | -                | System-Related            |
| Mikal J.P <sup>456</sup>        | 2021 | USA       | English  | Article          | Breast        | Active Treatment to Survivorship           |                                                                                             | Quasi-Experimental                      | -                | Patient-Related           |
| Mikal J.P <sup>457</sup>        | 2020 | USA       | English  | Article          | Breast        | Active Treatment to Survivorship           |                                                                                             | Quasi-Experimental                      | -                | Patient-Related           |
| Mikal J.P <sup>458</sup>        | 2020 | USA       | English  | Article          | Breast        | Multiple                                   |                                                                                             | Retrospective Review                    | -                | Patient-Related           |
| Milesky J <sup>459</sup>        | 2018 | USA       | English  | Article          | Multiple      | Multiple                                   |                                                                                             | Quasi-Experimental Implementation Study | -                | Patient-Related           |
| Miller K <sup>460</sup>         | 2021 | USA       | English  | Conference       | Multiple      | Active Treatment to Survivorship           |                                                                                             | Retrospective Cohort                    | -                | Patient- & System-Related |
| Miller S.J <sup>461</sup>       | 2015 | England   | English  | Article          | Multiple      | Intensive Care Unit to End-of-Life Care    |                                                                                                                                                                                | Retrospective Cohort                    | -                | Patient-Related           |
| Mills S <sup>462</sup>          | 2020 | -         | English  | Article          | Not Specified | -                                          |                                                                                                                                                                                | Systematic Review                       | -                | Patient- & System-Related |
| Mimouni H <sup>463</sup>        | 2020 | Morocco   | English  | Article          | Cervical      | Diagnosis to Treatment                     |                                                                                             | Retrospective Cohort                    | -                | Patient- & System-Related |
| Mimouni H <sup>464</sup>        | 2022 | Morocco   | English  | Article          | Breast        | Diagnosis to Treatment                     |                                                                                             | Retrospective Cohort                    | -                | Patient- & System-Related |
| Missel M <sup>465</sup>         | 2015 | Denmark   | English  | Article          | Lung          | Hospital to Home                           |                                                                                             | Qualitative Grounded Theory Study       | -                | Patient-Related           |
| Miura T <sup>466</sup>          | 2012 | Japan     | English  | Conference       | Multiple      | Hospital to Palliative Home Care           |                                                                                                                                                                              | Retrospective Review                    | -                | System-Related            |
| Mollica M <sup>467</sup>        | 2015 | USA       | English  | Article          | Breast        | Active Treatment to Survivorship           |                                                                                         | Qualitative Descriptive Study           | -                | Patient-Related           |
| Montero A.J <sup>468</sup>      | 2016 | USA       | English  | Article          | Multiple      | Readmission                                |                                                                                         | Cross Sectional Multi-Center Survey     | -                | Patient-Related           |
| Monterosso L <sup>469</sup>     | 2017 | Australia | English  | Article          | Lymphoma      | Active Treatment to Survivorship           |    | Brief Descriptive Study                 | -                | Patient-Related           |
| Montiel Ishino F <sup>470</sup> | 2021 | USA       | English  | Article          | Prostate      | Diagnosis to Treatment                     |                                                                                         | Retrospective Cohort                    | -                | Patient-Related           |
| Moon E <sup>471</sup>           | 2021 | Singapore | English  | Article          | -             | Readmission                                |                                                                                         | Retrospective Cohort                    | -                | Patient- & System-Related |
| Moon J <sup>472</sup>           | 2022 | Canada    | English  | Article          | Colorectal    | Hospital to Home                           |    | Retrospective Cohort                    | -                | Patient-Related           |

| Author                     | Year | Country     | Language | Publication Type | Cancer Type            | TiC                                          | Objectives                                                                                                                                                                  | Study Design                                             | # of Patient TiC | Outcome                   |
|----------------------------|------|-------------|----------|------------------|------------------------|----------------------------------------------|-----------------------------------------------------------------------------------------------------------------------------------------------------------------------------|----------------------------------------------------------|------------------|---------------------------|
| Mooney K <sup>473</sup>    | 2022 | USA         | English  | Conference       | Multiple               | Hospital to Home                             |                                                                                          | Cancer Program                                           | -                | Patient- & System-Related |
| Mooney K <sup>474</sup>    | 2021 | USA         | English  | Article          | Multople               | Hospital to Home                             |       | Prospective, Nonrandomized, Real-World Cohort Comparison | -                | Patient- & System-Related |
| Moore N <sup>475</sup>     | 2021 | USA         | English  | Article          | Acute Myeloid Leukemia | Hospital to Home                             |                                                                                          | Retrospective Cohort                                     | -                | System-Related            |
| Morell A <sup>476</sup>    | 2023 | USA         | English  | Article          | Multiple               | Readmission                                  |                                                                                          | Retrospective Cohort                                     | -                | Patient-Related           |
| Morey T <sup>477</sup>     | 2021 | Canada      | English  | Article          | Multiple               | Hospital to Palliative Care                  |                                                                                          | Longitudinal Qualitative Design                          | -                | Patient- & System-Related |
| Morisaku M <sup>478</sup>  | 2022 | Japan       | English  | Article          | Lymphoma               | Oncology to Palliative Care                  |       | Retrospective Cohort                                     | -                | Patient- & System-Related |
| Morita T <sup>479</sup>    | 2004 | Japan       | English  | Article          | Multiple               | Active Treatment to Palliative Care          |                                                                                          | Retrospective Cohort                                     | -                | Patient- & System-Related |
| Morita T <sup>480</sup>    | 2008 | Japan       | English  | Article          | Multiple               | Active Treatment to Palliative Care          |                                                                                          | Audit Study                                              | -                | Patient- & System-Related |
| Morita T <sup>481</sup>    | 2005 | Japan       | English  | Article          | Multiple               | Palliative Care Team to Palliative Care Unit |       | Retrospective Cohort                                     | -                | Patient-Related           |
| Moser A <sup>482</sup>     | 2021 | Netherlands | English  | Article          | Multiple               | Multiple                                     |                                                                                          | Qualitative Study                                        | -                | Patient- & System-Related |
| Mou J <sup>483</sup>       | 2019 | USA         | English  | Article          | Multiple               | Diagnosis to Treatment                       |                                                                                          | Retrospective Cohort                                     | -                | Patient- & System-Related |
| Moura S <sup>484</sup>     | 2022 | Canada      | English  | Article          | Multiple               | Active Treatment to Survivorship             |                                                                                          | Transitional Program                                     | -                | Patient- & System-Related |
| Mukherjee S <sup>485</sup> | 2023 | Canada      | English  | Article          | Multiple               | Oncology to Primary Care                     |     | Retrospective Cohort                                     | -                | Patient-Related           |
| Muktar S <sup>486</sup>    | 2015 | England     | English  | Article          | Breast                 | Active Treatment to Survivorship             |                                                                                        | Pre and Post Test Study                                  | -                | Patient-Related           |
| Murphy C <sup>487</sup>    | 2015 | USA         | English  | Article          | Head and Neck          | Diagnosis to Treatment                       |   | Retrospective Cohort                                     | -                | Patient-Related           |
| Muslim Z <sup>488</sup>    | 2023 | USA         | English  | Article          | Lung                   | Diagnosis to Treatment                       |   | Retrospective Cohort                                     | -                | Patient-Related           |
| Mussab K <sup>489</sup>    | 2022 | Germany     | English  | Conference       | Head and Neck          | Diagnosis to Treatment                       |                                                                                        | Retrospective Cohort                                     | -                | Patient-Related           |
| Nahm E.S <sup>490</sup>    | 2019 | USA         | English  | Article          | Multiple               | Active Treatment to Posttreatment            |                                                                                        | -                                                        | -                | Patient-Related           |
| Nam G <sup>491</sup>       | 2023 | South Korea | English  | Article          | Brain                  | Rehabilitation to Primary Acute Care         |                                                                                        | Retrospective Cohort                                     | -                | Patient-Related           |
| Napoles A.M <sup>492</sup> | 2017 | USA         | English  | Article          | Non-metastatic Breast  | Active Treatment to Survivorship             |                                                                                        | Qualitative Study                                        | -                | System-Related            |
| Nathan C <sup>493</sup>    | 2021 | USA         | English  | Conference       | Multiple               | Multiple                                     |                                                                                        | Case Control Study-                                      | -                | Patient-Related           |

| Author                      | Year | Country      | Language | Publication Type | Cancer Type                         | TiC                                                     | Objectives                                                                            | Study Design                           | # of Patient TiC  | Outcome                   |
|-----------------------------|------|--------------|----------|------------------|-------------------------------------|---------------------------------------------------------|---------------------------------------------------------------------------------------|----------------------------------------|-------------------|---------------------------|
| Navarro S <sup>494</sup>    | 2021 | USA          | English  | Conference       | Breast                              | Diagnosis to Surgery                                    |    | Retrospective Cohort                   | -                 | Patient-Related           |
| Nazareth I <sup>495</sup>   | 2008 | England      | English  | Article          | Multiple                            | Multiple                                                |    | Case Study                             | -                 | Patient-Related           |
| Nekhlyudov L <sup>496</sup> | 2012 | USA          | English  | Article          | Multiple                            | Multiple                                                |    | -                                      | -                 | Patient-Related           |
| Nemirovsky D <sup>497</sup> | 2023 | USA          | English  | Article          | Multiple                            | Diagnosis to Treatment                                  |    | Single Institution Analysis            | -                 | Patient-Related           |
| Neron M <sup>498</sup>      | 2020 | France       | English  | Article          | Endometrial                         | Diagnosis to Treatment                                  |    | Multicentric Retrospective Study       | -                 | Patient-Related           |
| Nguyen D <sup>499</sup>     | 2021 | USA          | English  | Article          | Prostate                            | Diagnosis to Treatment                                  |    | Systematic Review                      | -                 | Patient- & System-Related |
| Nguyen N <sup>500</sup>     | 2022 | USA          | English  | Article          | Vulvar                              | Treatment Initiation to Completion                      |    | Retrospective Cohort                   | -                 | Patient- & System-Related |
| Nguyen P <sup>501</sup>     | 2022 | Canada       | English  | Article          | Thyroid                             | Specialist to Primary Care                              |    | Retrospective Cohort                   | -                 | Patient-Related           |
| Nieminen M <sup>502</sup>   | 2020 | Finland      | English  | Article          | Head and Neck                       | Multiple                                                |    | Retrospective Cohort                   | -                 | Patient- & System-Related |
| Nikonova N <sup>503</sup>   | 2015 | Canada       | English  | Article          | Diffuse Large B-Cell Lymphoma       | Diagnosis to Treatment                                  |    | -                                      | -                 | Patient-Related           |
| Nissim R <sup>504</sup>     | 2014 | Canada       | English  | Article          | Acute Myeloid Leukemia              | Inpatient Care to Ambulatory Care                       |    | Randomized Clinical Trial              | -                 | Patient- & System-Related |
| Nkosi P <sup>505</sup>      | 2021 | South Africa | English  | Article          | Multiple                            | Traditional Health Practitioner to Radiation Oncologist |    | Qualitative Study                      | -                 | System-Related            |
| Nocon C.C <sup>506</sup>    | 2014 | -            | English  | Conference       | Oral tongue Squamous Cell Carcinoma | Diagnosis to Surgery                                    |    | Narrative Review                       | -                 | System-Related            |
| Nogueira M <sup>507</sup>   | 2023 | Brazil       | English  | Article          | Breast                              | Diagnosis to Treatment                                  |    | Follow-Up Study                        | 22,956;<br>17,722 | Patient-Related           |
| Nordly M <sup>508</sup>     | 2018 | Denmark      | English  | Article          | Multiple                            | Active Treatment to Palliative Care                     |    | Qualitative Descriptive Study          | -                 | Patient-Related           |
| Nordt S <sup>509</sup>      | 2023 | Ireland      | English  | Article          | Multiple                            | Multiple                                                |    | Retrospective Cohort                   | 141               | Patient-Related           |
| Northfield S <sup>510</sup> | 2019 | Australia    | English  | Article          | Multiple                            | Multiple                                                |    | Narrative Review                       | -                 | Patient-Related           |
| Norton S.A <sup>511</sup>   | 2019 | USA          | English  | Article          | Multiple                            | Multiple                                                |   | Descriptive Qualitative Study          | -                 | System-Related            |
| Noteboom E <sup>512</sup>   | 2020 | Netherlands  | English  | Article          | Multiple                            | Diagnosis to Treatment                                  |  | A Non-Comparative Intervention Design, | -                 | Patient- & System-Related |
| Nowak M <sup>513</sup>      | 2021 | Germany      | English  | Article          | Breast                              | Discharge                                               |  | Cross-Sectional Study                  | -                 | Patient- & System-Related |
| Noyes E <sup>514</sup>      | 2021 | USA          | English  | Article          | Head and Neck                       | Surgery to Radiation                                    |  | Narrative Review                       | -                 | Patient-Related           |
| Numata K <sup>515</sup>     | 2006 | Japan        | English  | Conference       | Multiple                            | Hospital to Home                                        |  | -                                      | -                 | Patient-Related           |

| Author                         | Year | Country | Language | Publication Type | Cancer Type               | TiC                                      | Objectives                                                                                                                                                                  | Study Design                     | # of Patient TiC | Outcome                   |
|--------------------------------|------|---------|----------|------------------|---------------------------|------------------------------------------|-----------------------------------------------------------------------------------------------------------------------------------------------------------------------------|----------------------------------|------------------|---------------------------|
| O'Brien M.A. <sup>516</sup>    | 2015 | Canada  | English  | Article          | Breast                    | Active Treatment to Family Physician     |                                                                                          | Randomized Controlled Trial      | -                | Patient-Related           |
| Obrochta C. <sup>517</sup>     | 2020 | USA     | English  | Conference       | Lung                      | Diagnosis to Treatment                   |                                                                                          | Retrospective Cohort             | -                | Patient-Related           |
| Obrochta C. <sup>518</sup>     | 2021 | USA     | English  | Article          | Colorectal                | Diagnosis to Treatment                   |                                                                                          | Retrospective Cohort             | -                | Patient-Related           |
| Ogura K. <sup>519</sup>        | 2021 | USA     | English  | Article          | Multiple                  | Diagnosis to Surgery                     |                                                                                          | Retrospective Cohort             | -                | Patient-Related           |
| O'Hea E. <sup>520</sup>        | 2016 | USA     | English  | Article          | Non-metastatic Breast     | Active Treatment to Survivorship         |                                                                                          | Pilot Study                      | -                | Patient-Related           |
| O'Hea E. <sup>521</sup>        | 2022 | USA     | English  | Article          | Breast                    | Active Treatment to Survivorship         |                                                                                          | Randomized Controlled Trial      | -                | Patient- & System-Related |
| Oksholm T. <sup>522</sup>      | 2018 | Norway  | English  | Article          | Lung                      | Interhospital                            |                                                                                          | Qualitative Implementation Study | -                | System-Related            |
| O'Malley D. <sup>523</sup>     | 2023 | USA     | English  | Conference       | Multiple                  | Primary Care to Oncology                 |       | Comparative Case Study           | -                | System-Related            |
| Ornstein K.A. <sup>524</sup>   | 2016 | USA     | English  | Article          | Multiple                  | Transition to End-of-Life Care           |                                                                                          | Case Study                       | -                | Patient- & System-Related |
| Ortega A. <sup>525</sup>       | 2021 | USA     | English  | Article          | Multiple                  | Infusion Center to Hospital              |                                                                                          | Retrospective Chart Review       | -                | Patient- & System-Related |
| Ourfali S. <sup>526</sup>      | 2022 | France  | English  | Article          | Bladder                   | Multiple                                 |                                                                                          | Retrospective Cohort             | -                | Patient- & System-Related |
| Pace A. <sup>527</sup>         | 2023 | Italy   | English  | Article          | Brain                     | Multiple                                 |                                                                                          | Retrospective Cohort             | -                | System-Related            |
| Padgett L. <sup>528</sup>      | 2013 | USA     | English  | Conference       | Multiple                  | Active Care to Survivorship              |                                                                                         | -                                | -                | Patient-Related           |
| Padilla-Ruiz M. <sup>529</sup> | 2021 | Spain   | English  | Article          | Breast                    | Time From Biopsy to Surgery              |                                                                                        | Prospective Cohort               | -                | Patient- & System-Related |
| Paek J. <sup>530</sup>         | 2022 | USA     | English  | Article          | Cervical                  | Hospital to Home                         |                                                                                        | Retrospective Cohort             | -                | Patient- & System-Related |
| Page J.S. <sup>531</sup>       | 2016 | USA     | English  | Article          | Acute Myeloid Endometrial | Hospital to Home                         |                                                                                        | Case Study                       | -                | System-Related            |
| Page M. <sup>532</sup>         | 2014 | USA     | English  | Conference       | Brain                     | Active Treatment to Hospice              |                                                                                        | -                                | -                | Patient-Related           |
| Pairawan S. <sup>533</sup>     | 2021 | USA     | English  | Conference       | Merkel Cell Carcinoma     | Time From Diagnosis to Surgery           |                                                                                        | Retrospective Cohort             | -                | Patient- & System-Related |
| Palmer N. <sup>534</sup>       | 2011 | USA     | English  | Dissertation     | Colorectal                | Active Treatment to Survivorship         |                                                                                        | Multi-Method                     | -                | Patient-Related           |
| Pandya C. <sup>535</sup>       | 2019 | USA     | English  | Conference       | Multiple                  | Multiple                                 |   | Quality Improvement              | -                | Patient-Related           |
| Paraghamian S. <sup>536</sup>  | 2020 | USA     | English  | Conference       | Cervical                  | Outside Facility back to Tertiary Center |                                                                                        | Retrospective Cohort             | -                | System-Related            |
| Park C. <sup>537</sup>         | 2021 | USA     | English  | Article          | Multiple                  | Active Treatment to Survivorship         |   | Prospective Cohort               | -                | Patient-Related           |
| Parker P. <sup>538</sup>       | 2023 | USA     | English  | Article          | Breast                    | Active Treatment to Survivorship         |                                                                                        | Descriptive Qualitative Study    | -                | Patient-Related           |
| Parry C. <sup>539</sup>        | 2011 | USA     | English  | Article          | Multiple                  | Active Treatment to Survivorship         |                                                                                        | Qualitative Study                | -                | System-Related            |



| Author                           | Year | Country     | Language | Publication Type | Cancer Type        | TiC                                    | Objectives                                                                                                                                                                                                                                                  | Study Design                                  | # of Patient TiC | Outcome                   |
|----------------------------------|------|-------------|----------|------------------|--------------------|----------------------------------------|-------------------------------------------------------------------------------------------------------------------------------------------------------------------------------------------------------------------------------------------------------------|-----------------------------------------------|------------------|---------------------------|
| Parsons M <sup>540</sup>         | 2022 | USA         | English  | Article          | Bile Duct          | Surgical Resection to Adjuvant Therapy |                                                                                                                                                                          | Retrospective Cohort                          | -                | Patient- & System-Related |
| Pascoe S <sup>541</sup>          | 2013 | Australia   | English  | Article          | Colorectal         | Multiple                               |                                                                                                                                                                          | Qualitative Study                             | -                | System-Related            |
| Patel B <sup>542</sup>           | 2022 | USA         | English  | Conference       | Multiple           | Home to Hospital                       |                                                                                                                                                                          | Quasi-Experimental                            | -                | System-Related            |
| Patel D <sup>543</sup>           | 2022 | USA         | English  | Article          | Lung               | Multiple                               |                                                                                                                                                                          | Retrospective Cohort                          | -                | System-Related            |
| Patel S.D <sup>544</sup>         | 2017 | USA         | English  | Article          | Multiple           | Multiple                               |                                                                                                                                                                          | Descriptive Study                             | -                | Patient-Related           |
| Pateman B <sup>545</sup>         | 2003 | England     | English  | Article          | Multiple           | Discharge                              |                                                                                                                                                                          | Qualitative Study                             | -                | System-Related            |
| Pathak P <sup>546</sup>          | 2021 | USA         | English  | Article          | Multiple           | Interhospital                          |                                                                                                                                                                          | Retrospective Cohort                          | -                | Patient- & System-Related |
| Patra L <sup>547</sup>           | 2022 | India       | English  | Article          | Multiple           | Oncology to Palliative                 |                                                                                                                                                                          | Systematic Review                             | -                | Patient- & System-Related |
| Payne S <sup>548</sup>           | 2023 | UK          | English  | Editor Notes     | Multiple           | Multiple                               |                                                                                                                                                                          | -                                             | -                | Patient- & System-Related |
| Pedersen A <sup>549</sup>        | 2014 | Canada      | English  | Article          | Breast             | Multiple                               |                                                                                       | Open Label Single Arm Pilot Study             | -                | Patient-Related           |
| Pepin A <sup>550</sup>           | 2022 | USA         | English  | Article          | Prostate           | Diagnosis to Treatment                 |                                                                                                                                                                          | Retrospective Cohort                          | -                | Patient-Related           |
| Pereira Shimada G <sup>551</sup> | 2022 | Brazil      | English  | Article          | Cutaneous Melanoma | Diagnosis to Treatment                 |                                                                                       | Retrospective Cohort                          | -                | Patient-Related           |
| Perfors I <sup>552</sup>         | 2021 | Netherlands | English  | Article          | Multiple           | Multiple                               |                                                                                       | Randomised Controlled Trial                   | -                | Patient- & System-Related |
| Perrin N <sup>553</sup>          | 1994 | France      | French   | Book             | Multiple           | Multiple                               |                                                                                                                                                                          | -                                             | -                | System-Related            |
| Petrovic B <sup>554</sup>        | 2023 | Canada      | English  | Article          | Multiple           | Active Treatment to Survivorship       |                                                                                       | Pragmatic Randomized Controlled Trial         | -                | Patient- & System-Related |
| Pham D <sup>555</sup>            | 2020 | USA         | English  | Article          | Lung               | Interhospital                          |                                                                                       | Retrospective Review                          | -                | Patient-Related           |
| Phansuwon K <sup>556</sup>       | 2019 | Australia   | English  | Article          | Multiple           | Active Treatment to Survivorship       |                                                                                       | Cross-Sectional                               | -                | Patient- & System-Related |
| Philip J <sup>557</sup>          | 2021 | -           | English  | Article          | Multiple           | Oncology to Palliative                 |    | Multi-Site Stepped Wedge Implementation Trial | -                | Patient- & System-Related |
| Phillip J <sup>558</sup>         | 2019 | Australia   | English  | Article          | Glioma             | Multiple                               |                                                                                                                                                                          | Retrospective Cohort                          | -                | Patient-Related           |
| Phillips W <sup>559</sup>        | 2021 | USA         | English  | Article          | Lung               | Diagnosis to Treatment                 |                                                                                   | Retrospective Review                          | -                | Patient- & System-Related |
| Pinheiro L <sup>560</sup>        | 2022 | USA         | English  | Article          | Multiple           | Survivorship to Primary Care           |                                                                                                                                                                        | Prospective Cohort                            | -                | Patient-Related           |

| Author                         | Year | Country   | Language | Publication Type | Cancer Type                          | TiC                                           | Objectives                                                                            | Study Design                                          | # of Patient TiC | Outcome                   |
|--------------------------------|------|-----------|----------|------------------|--------------------------------------|-----------------------------------------------|---------------------------------------------------------------------------------------|-------------------------------------------------------|------------------|---------------------------|
| Pisotska L <sup>561</sup>      | 2020 | Germany   | English  | Conference       | Lung                                 | Diagnosis to Treatment                        |    | Prospective Cohort                                    | -                | Patient-Related           |
| Poortmans P <sup>562</sup>     | 2020 | France    | English  | Conference       | Multiple                             | Diagnosis to Treatment                        |    | Program                                               | -                | System-Related            |
| Porritt L <sup>563</sup>       | 2022 | UK        | English  | Conference       | Oesophagogastric                     | Multiple                                      |    | Retrospective Cohort                                  | -                | Patient- & System-Related |
| Prince M <sup>564</sup>        | 2019 | USA       | English  | Article          | Multiple                             | Hospital to Home                              |    | Retrospective Cohort                                  | -                | Patient-Related           |
| Prsic E.H <sup>565</sup>       | 2015 | USA       | English  | Article          | Multiple                             | End-of-Life Care                              |    | Retrospective Cohort                                  | -                | Patient-Related           |
| Pumpalova Y <sup>566</sup>     | 2022 | USA       | English  | Article          | Breast                               | Diagnosis to Treatment                        |    | Prospective Cohort                                    | -                | Patient-Related           |
| Qatanani A <sup>567</sup>      | 2022 | USA       | English  | Conference       | Sinonasal Undifferentiated Carcinoma | Diagnosis to Treatment                        |    | Retrospective Cohort                                  | -                | Patient-Related           |
| Qiu J <sup>568</sup>           | 2021 | USA       | English  | Article          | Breast                               | Multiple                                      |    | Qualitative Study                                     | -                | System-Related            |
| Qu L <sup>569</sup>            | 2022 | Australia | English  | Article          | Prostate                             | Diagnosis to Treatment                        |    | Prospective Cohort                                    | -                | Patient-Related           |
| Quinza R.A <sup>570</sup>      | 2017 | England   | English  | Conference       | Blood                                | Admission to Critical Care Unit               |    | -                                                     | -                | System-Related            |
| Radhakrishnan A <sup>571</sup> | 2017 | USA       | English  | Conference       | Multiple                             | Multiple                                      |    | Descriptive Analysis                                  | -                | Patient-Related           |
| Raeymaekers B <sup>572</sup>   | 2014 | Belgium   | English  | Conference       | Breast                               | Multiple                                      |    | -                                                     | -                | Patient-Related           |
| Rahool R <sup>573</sup>        | 2021 | Pakistan  | English  | Article          | Breast                               | Diagnosis to Treatment                        |    | Prospective Cohort                                    | -                | Patient-Related           |
| Raiss M <sup>574</sup>         | 2023 | USA       | English  | Conference       | Multiple                             | Readmission                                   |    | Quality Improvement Project                           | -                | Patient-Related           |
| Ramsay J <sup>575</sup>        | 2018 | USA       | English  | Article          | Multiple                             | Active Treatment to Follow-Up Care            |   | Qualitative Study                                     | -                | Patient-Related           |
| Rancour P <sup>576</sup>       | 2008 | USA       | English  | Article          | Multiple                             | Active Treatment to Survivorship              |  | -                                                     | -                | Patient- & System-Related |
| Rankin N.M <sup>577</sup>      | 2017 | Australia | English  | Article          | Lung                                 | Diagnosis to Treatment                        |  | Qualitative Study                                     | -                | Patient-Related           |
| Rao A <sup>578</sup>           | 2021 | -         | English  | Article          | Hepatocellular Carcinoma             | Delays                                        |  | Retrospective Cohort                                  | -                | Patient-Related           |
| Rariy C <sup>579</sup>         | 2021 | USA       | English  | Conference       | Multiple                             | Between Healthcare Providers During Treatment |  | -                                                     | -                | Patient-Related           |
| Rayson D <sup>580</sup>        | 2007 | USA       | English  | Article          | Multiple                             | Multiple                                      |  | Retrospective Database Review                         | 1476             | System-Related            |
| Reeder-Hayes K <sup>581</sup>  | 2023 | USA       | English  | Article          | Breast                               | Diagnosis to Treatment                        |  | Population-Based, Retrospective, Observational Cohort | -                | Patient-Related           |

| Author                          | Year | Country     | Language | Publication Type | Cancer Type   | TiC                                    | Objectives                                                                                                                                                                  | Study Design                                 | # of Patient TiC | Outcome                   |
|---------------------------------|------|-------------|----------|------------------|---------------|----------------------------------------|-----------------------------------------------------------------------------------------------------------------------------------------------------------------------------|----------------------------------------------|------------------|---------------------------|
| Rege R <sup>582</sup>           | 2022 | USA         | English  | Article          | Multiple      | Hospital to Hospice                    |                                                                                          | Retrospective Chart Review                   | -                | System & Patient-Related  |
| Reinke L.F <sup>583</sup>       | 2008 | USA         | English  | Article          | Multiple      | Multiple                               |                                                                                          | Qualitative Study                            | -                | Patient-Related           |
| Reis de Sousa A <sup>584</sup>  | 2022 | Brazil      | English  | Article          | Prostate      | Multiple                               |                                                                                          | Descriptive Study                            | -                | Patient-Related           |
| Reville B <sup>585</sup>        | 2010 | USA         | English  | Article          | Lung          | Active Treatment to Palliative Care    |                                                                                          | Retrospective Review                         | -                | Patient-Related           |
| Rio I.M <sup>586</sup>          | 2017 | Australia   | English  | Article          | Endometrial   | Active Treatment to Follow-Up Care     |                                                                                          | Cross-Sectional Survey                       | -                | System-Related            |
| Riolfi M <sup>587</sup>         | 2021 | Italy       | English  | Conference       | Multiple      | Oncology to Palliative Care at Home    |                                                                                          | Retrospective Cohort                         | -                | Patient-Related           |
| Rocío L <sup>588</sup>          | 2017 | Columbia    | English  | Article          | Multiple      | Hospital to Home                       |                                                                                          | Cross-Sectional                              | -                | Patient-Related           |
| Rodrigues C <sup>589</sup>      | 2022 | Brazil      | English  | Article          | Multiple      | Multiple                               |       | Explanatory Sequential Research Design       | -                | Patient- & System-Related |
| Rodrigues C <sup>590</sup>      | 2023 | Brazil      | English  | Article          | Multiple      | Hospital to Community                  |       | Cross-Sectional                              | -                | -                         |
| Romkey-Sinasac C <sup>591</sup> | 2021 | Canada      | English  | Article          | Multiple      | Multiple                               |       | Literature Review                            | -                | Patient- & System-Related |
| Roorda C <sup>592</sup>         | 2013 | Netherlands | English  | Article          | Multiple      | Specialist to Primary Care Provider    |       | Cross-Sectional                              | -                | Patient-Related           |
| Roorda C <sup>593</sup>         | 2015 | Netherlands | English  | Article          | Breast        | Follow-Up to Primary or Secondary Care |                                                                                          | Qualitative Study                            | -                | Patient-Related           |
| Rosenberg C.A <sup>594</sup>    | 2016 | USA         | English  | Article          | Breast        | Active Treatment to Follow-Up Care     |       | Questionnaire Pre and Post                   | -                | Patient-Related           |
| Rosenberg L.B <sup>595</sup>    | 2020 | USA         | English  | Perspective      | Multiple      | Hospital To Palliative Care            | -                                                                                                                                                                           | -                                            | -                | Patient- & System-Related |
| Rosengren K <sup>596</sup>      | 2021 | Sweden      | English  | Article          | Head and Neck | Active Treatment to Survivorship       |                                                                                          | Qualitative Study                            | -                | Patient-Related           |
| Rosenzweig S <sup>597</sup>     | 2022 | USA         | English  | Article          | Bladder       | Discharge                              |                                                                                          | Observational Analysis                       | -                | Patient-Related           |
| Ross L <sup>598</sup>           | 2022 | USA         | English  | Article          | Multiple      | Active Treatment to Survivorship       |                                                                                          | Mixed-Methods                                | -                | Patient- & System-Related |
| Roundtree A.K <sup>599</sup>    | 2011 | USA         | English  | Article          | Breast        | Multiple                               |                                                                                          | Qualitative Study                            | 31               | Patient- & System-Related |
| Roy M <sup>600</sup>            | 2022 | USA         | English  | Conference       | Multiple      | Hospital to Oncology                   |                                                                                          | Quality Improvement                          | -                | System-Related            |
| Rubens M <sup>601</sup>         | 2022 | USA         | English  | Article          | Multiple      | Interhospital                          |                                                                                          | Retrospective Cross-Sectional                | 72,353           | Patient- & System-Related |
| Ruddy K <sup>602</sup>          | 2013 | USA         | English  | Article          | Breast        | Active Treatment to Survivorship       |                                                                                        | Exploratory Qualitative Research Pilot Study | -                | Patient-Related           |
| Russell L <sup>603</sup>        | 2020 | Australia   | English  | Article          | Multiple      | Multiple                               |   | Mixed-Methods                                | -                | Patient- & System-Related |

| Author                           | Year | Country   | Language | Publication Type | Cancer Type | TiC                                                                          | Objectives                                                                                                                                                                  | Study Design             | # of Patient TiC | Outcome                   |
|----------------------------------|------|-----------|----------|------------------|-------------|------------------------------------------------------------------------------|-----------------------------------------------------------------------------------------------------------------------------------------------------------------------------|--------------------------|------------------|---------------------------|
| Russell L <sup>604</sup>         | 2019 | Australia | English  | Article          | Multiple    | Acute Treatment to Community-Based Care                                      |                                                                                          | Literature Review        | -                | Patient- & System-Related |
| Rutherford C <sup>605</sup>      | 2022 | Australia | English  | Conference       | Colorectal  | Active Treatment to Survivorship                                             |                                                                                          | Interpretive Descriptive | -                | Patient-Related           |
| Rutkowski N <sup>606</sup>       | 2021 | Canada    | English  | Article          | Breast      | Wellness Beyond Cancer Program to Survivorship Care Plan                     |                                                                                          | Program Evaluation       | -                | Patient-Related           |
| Rutledge T <sup>607</sup>        | 2017 | USA       | English  | Article          | Endometrial | Follow-Up to Primary Care                                                    |       | Qualitative Study        | -                | Patient-Related           |
| Saab M <sup>608</sup>            | 2022 | Ireland   | English  | Article          | Lung        | General Practitioner/Primary Healthcare Provider to Specialist (Lung Cancer) |       | Systematic Review        | -                | Patient- & System-Related |
| Saab M <sup>609</sup>            | 2022 | Ireland   | English  | Article          | Lung        | Primary Healthcare Provider to Lung Cancer Specialists                       |                                                                                          | Qualitative Description  | -                | Patient- & System-Related |
| Saadat L <sup>610</sup>          | 2020 | USA       | English  | Article          | Rectal      | Discharge                                                                    |                                                                                          | Retrospective Cohort     | -                | Patient- & System-Related |
| Sabo B <sup>611</sup>            | 2016 | Canada    | English  | Article          | Brain       | Other Setting to Palliative Care                                             |       | Literature Review        | 504              | Patient-Related           |
| Sadowski D <sup>612</sup>        | 2018 | USA       | English  | Article          | Bladder     | Readmission                                                                  |       | Retrospective Cohort     | -                | Patient-Related           |
| Safae M.M <sup>613</sup>         | 2019 | USA       | English  | Article          | Brain       | Interhospital                                                                |       | Prospective Cohort       | -                | Patient-Related           |
| Saka-Herran C <sup>614</sup>     | 2021 | Spain     | English  | Article          | Oral        | Multiple                                                                     |       | Literature Review        | -                | Patient- & System-Related |
| Salner A <sup>615</sup>          | 2012 | USA       | English  | Conference       | Breast      | Acute Treatment to Follow-Up Care                                            |                                                                                          | -                        | -                | Patient-Related           |
| Sanabria D <sup>616</sup>        | 2020 | Colombia  | English  | Article          | Multiple    | Hospital to Home                                                             |                                                                                          | Systematic Review        | -                | System-Related            |
| Sancho Zamora M.A <sup>617</sup> | 2019 | Spain     | English  | Article          | Multiple    | Other Setting to Palliative Care                                             |       | Prospective Cohort       | -                | Patient-Related           |
| Sandager M <sup>618</sup>        | 2015 | Denmark   | English  | Article          | Multiple    | Multiple                                                                     |       | Survey                   | -                | Patient-Related           |
| Sandell T <sup>619</sup>         | 2022 | Australia | English  | Article          | Multiple    | Oncologist to General Practitioner                                           |                                                                                        | Systematic Review        | -                | System-Related            |
| Sander C <sup>620</sup>          | 2021 | Germany   | English  | Article          | Brain       | Readmission                                                                  |   | Retrospective Cohort     | 86               | Patient-Related           |
| Sanft T <sup>621</sup>           | 2015 | USA       | English  | Conference       | Multiple    | Other Setting to Survivorship Clinic                                         |                                                                                        | Literature Review        | -                | Patient-Related           |
| Sanuade O <sup>622</sup>         | 2021 | Ghana     | English  | Article          | Breast      | Diagnosis to Treatment                                                       |                                                                                        | Qualitative Study        | -                | Patient-Related           |
| Sargeran K <sup>623</sup>        | 2013 | Iran      | English  | Conference       | Oral        | Diagnosis to Treatment                                                       |                                                                                        | -                        | -                | Patient-Related           |
| Schermerhorn M <sup>624</sup>    | 2022 | USA       | English  | Article          | Breast      | Diagnosis to Treatment                                                       |                                                                                        | Retrospective Cohort     | -                | Patient-Related           |
| Schiaffino M <sup>625</sup>      | 2019 | USA       | English  | Conference       | Colorectal  | Diagnosis to Treatment                                                       |                                                                                        | Retrospective Cohort     | -                | Patient-Related           |
| Schiaffino M <sup>626</sup>      | 2022 | USA       | English  | Article          | Colorectal  | Diagnosis to Treatment                                                       |                                                                                        | Retrospective Cohort     | -                | Patient- & System-Related |

| Author                           | Year | Country      | Language | Publication Type | Cancer Type   | TiC                                  | Objectives                                                                                                                                                                  | Study Design                                  | # of Patient TiC | Outcome                   |
|----------------------------------|------|--------------|----------|------------------|---------------|--------------------------------------|-----------------------------------------------------------------------------------------------------------------------------------------------------------------------------|-----------------------------------------------|------------------|---------------------------|
| Schmidt H <sup>627</sup>         | 2014 | Germany      | English  | Conference       | Multiple      | Hospital to Rehabilitation Clinic    |                                                                                          | -                                             | -                | Patient-Related           |
| Schnabel A <sup>628</sup>        | 2022 | Germany      | English  | Conference       | Multiple      | Oncology to Palliative Care          |                                                                                          | Prospective Cohort                            | 139              | System-Related            |
| Schofield P <sup>629</sup>       | 2006 | Australia    | English  | Article          | Multiple      | Curative Care to Palliative Care     |       | -                                             | -                | System-Related            |
| Schoonbeek R <sup>630</sup>      | 2021 | Netherlands  | English  | Article          | Head and Neck | Diagnosis to Treatment               |                                                                                          | Retrospective Cohort                          | -                | Patient-Related           |
| Schoonbeek R <sup>631</sup>      | 2021 | Netherlands  | English  | Article          | Head and Neck | Diagnosis to Treatment               |                                                                                          | Prospective Cohort                            | -                | Patient-Related           |
| Schoonbeek R <sup>632</sup>      | 2022 | Netherlands  | English  | Article          | Head and Neck | Diagnosis to Treatment               |       | Prospective Cohort                            | -                | Patient-Related           |
| Schulman-Green, D <sup>633</sup> | 2012 | USA          | English  | Article          | Ovarian       | Multiple                             |       | Retrospective Cohort                          | 4,220            | Patient-Related           |
| Schwabe S <sup>634</sup>         | 2018 | Germany      | English  | Conference       | Multiple      | Curative Care to Palliative Care     |                                                                                          | Discourse Analysis                            | -                | Patient- & System-Related |
| Scott D <sup>635</sup>           | 2020 | UK           | English  | Conference       | Breast        | Multiple                             |       | Retrospective Cohort                          | -                | Patient-Related           |
| Scott Sutton S <sup>636</sup>    | 2013 | USA          | English  | Conference       | Prostate      | Urology to Oncology                  |       | Retrospective Cohort                          | -                | Patient-Related           |
| Seaman A <sup>637</sup>          | 2022 | USA          | English  | Article          | Head and Neck | Active Treatment to Survivorship     |                                                                                          | Retrospective Cohort                          | -                | Patient-Related           |
| Sebring E <sup>638</sup>         | 2020 | USA          | English  | Article          | Multiple      | Hospital to Home                     |                                                                                          | Retrospective Cohort                          | -                | Patient- & System-Related |
| Sedhom R <sup>639</sup>          | 2021 | USA          | English  | Article          | Multiple      | Phase I Intervention to Hospice Care |                                                                                          | Retrospective Cohort                          | -                | Patient- & System-Related |
| Sekimoto G <sup>640</sup>        | 2022 | Japan        | English  | Article          | Multiple      | Palliative Care Unit to Home         |                                                                                          | Cross-Sectional                               | -                | Patient- & System-Related |
| Seow H <sup>641</sup>            | 2009 | USA          | English  | Article          | Multiple      | Multiple                             |                                                                                          | Cross Sectional Study                         | -                | Patient-Related           |
| Shadmi E <sup>642</sup>          | 2011 | Israel       | English  | Conference       | Multiple      | Multiple                             |       | Retrospective Analysis                        | -                | Patient-Related           |
| Shadmi E <sup>643</sup>          | 2010 | Israel       | English  | Article          | Multiple      | Hospital to Home                     |   | Retrospective Cross Sectional Study           | -                | Patient-Related           |
| Shafae MN <sup>644</sup>         | 2022 | USA & Brazil | English  | Article          | Breast Cancer | Diagnosis to Treatment               |   | Retrospective Cohort                          | -                | Patient- & System-Related |
| Shahnazi A <sup>645</sup>        | 2021 | USA          | English  | Dissertation     | Breast        | Active Treatment to Survivorship     |                                                                                        | Qualitative Descriptive Approach              | -                | Patient-Related           |
| Shaikh N <sup>646</sup>          | 2022 | USA          | English  | Article          | Head and Neck | Diagnosis to Treatment               |   | Retrospective Cohort                          | -                | Patient- & System-Related |
| Shank B <sup>647</sup>           | 2017 | USA          | English  | Article          | Multiple      | Multiple                             |   | -                                             | -                | Patient-Related           |
| Sharma G <sup>648</sup>          | 2009 | USA          | English  | Article          | Lung          | Outpatient to Inpatient              |                                                                                        | Cross Sectional Multimethod Qualitative Study | -                | Patient-Related           |

| Author                          | Year | Country   | Language | Publication Type | Cancer Type              | TiC                                | Objectives                                                                                                                                                                  | Study Design                                           | # of Patient TiC | Outcome                   |
|---------------------------------|------|-----------|----------|------------------|--------------------------|------------------------------------|-----------------------------------------------------------------------------------------------------------------------------------------------------------------------------|--------------------------------------------------------|------------------|---------------------------|
| Sharma G <sup>649</sup>         | 2013 | USA       | English  | Article          | Lung                     | Multiple                           |       | Retrospective Chart Review                             | -                | Patient-Related           |
| Shen A.H <sup>650</sup>         | 2016 | Canada    | English  | Article          | Testicular               | Active Treatment to Survivorship   |       | Perspective Study of Longitudinal Correlated Design    | -                | Patient-Related           |
| Sheni R <sup>651</sup>          | 2023 | USA       | English  | Article          | Multiple                 | Diagnosis to Treatment             |                                                                                          | Retrospective Cohort                                   | -                | Patient- & System-Related |
| Shenolikar R <sup>652</sup>     | 2019 | USA       | English  | Conference       | Urothelial Carcinoma     | Multiple                           |                                                                                          | Retrospective Cohort                                   | -                | System-Related            |
| Shih N.C <sup>653</sup>         | 2022 | Taiwan    | English  | Article          | Breast                   | Diagnosis to Treatment             |                                                                                          | Retrospective Cohort                                   | -                | Patient- & System-Related |
| Shimada N <sup>654</sup>        | 2017 | Japan     | English  | Article          | Multiple                 | Readmission                        |       | Retrospective Cohort                                   | -                | Patient-Related           |
| Shulha M <sup>655</sup>         | 2021 | Canada    | English  | Dissertation     | Breast                   | Active Treatment to Survivorship   |       | Sequential Explanatory Mixed Methods                   | -                | Patient-Related           |
| Shun S.C <sup>656</sup>         | 2017 | Taiwan    | English  | Article          | Hepatocellular Carcinoma | Hospital to Home                   |       | Retrospective Cohort                                   | -                | Patient-Related           |
| Siew Ping Lang D <sup>657</sup> | 2016 | Singapore | English  | Article          | Multiple                 | Hospital to Home                   |       | Retrospective Cohort                                   | 78,390           | Patient-Related           |
| Sifontes-Dubon M <sup>658</sup> | 2021 | Spain     | English  | Article          | Thyroid                  | Diagnosis to Treatment             |                                                                                          | Retrospective Review                                   | -                | Patient-Related           |
| Silva I.F.D <sup>659</sup>      | 2018 | Brazil    | English  | Article          | Cervical                 | Diagnosis to Treatment             |       | Retrospective Cohort                                   | 490,735          | Patient-Related           |
| Singh S <sup>660</sup>          | 2020 | USA       | English  | Article          | Multiple                 | Multiple                           |                                                                                          | Population-Based Cohort Study                          | 1,397            | Patient-Related           |
| Singh S.R.K <sup>661</sup>      | 2019 | USA       | English  | Conference       | Multiple                 | Hospital to Non-Acute Facility     |       | Pre and Post Test                                      | -                | Patient-Related           |
| Singh S.R.K <sup>662</sup>      | 2019 | USA       | English  | Conference       | Metastatic               | Hospital to Non-Acute Facility     |   | -                                                      | -                | Patient-Related           |
| Singh V <sup>663</sup>          | 2022 | USA       | English  | Abstract         | Any                      | Referral to Palliative Care        |   | Multidisciplinary Study                                | 6                | Patient- & System-Related |
| Sisler J.J <sup>664</sup>       | 2017 | Canada    | English  | Conference       | Colorectal               | Oncology to Primary Care           |   | Pre- and Post-Implementation                           | -                | Patient-Related           |
| Sisler J.J <sup>665</sup>       | 2012 | Canada    | English  | Article          | Colorectal               | Active Treatment to Follow-Up Care |                                                                                        | Survey                                                 | -                | Patient-Related           |
| Skolarus T.A <sup>666</sup>     | 2012 | USA       | English  | Article          | Prostate                 | Multiple                           |   | -                                                      | -                | Patient-Related           |
| Smith C <sup>667</sup>          | 2019 | England   | English  | Article          | Multiple                 | Hospital to Home                   |   | Prospective Cohort                                     | -                | Patient-Related           |
| Smith K <sup>668</sup>          | 2022 | 2022      | English  | Article          | Any                      | Transition to Survivorship         |                                                                                        | Randomized Controlled Trial and Qualitative Interviews | -                | Patient- & System-Related |

| Author                          | Year | Country   | Language | Publication Type | Cancer Type   | TiC                                   | Objectives                                                                                                                                                                                                                                                  | Study Design                                           | # of Patient TiC | Outcome                   |
|---------------------------------|------|-----------|----------|------------------|---------------|---------------------------------------|-------------------------------------------------------------------------------------------------------------------------------------------------------------------------------------------------------------------------------------------------------------|--------------------------------------------------------|------------------|---------------------------|
| Smith S <sup>669</sup>          | 2021 | 2021      | English  | Report           | Multiple      | Oncology to Primary Care              |                                                                                                                                                                          | Innovation Report                                      | -                | System-Related            |
| Smith S.D.M <sup>670</sup>      | 1999 | England   | English  | Article          | Multiple      | Provider to Provider                  |                                                                                                                                                                          | Literature Review                                      | -                | System-Related            |
| Smith-Graziani D <sup>671</sup> | 2020 | USA       | English  | Article          | Breast Cancer | Diagnosis to Treatment                |                                                                                                                                                                          | Retrospective Cohort                                   | -                | Patient-Related           |
| Snyder C <sup>672</sup>         | 2022 | USA       | English  | Article          | Multiple      | Active Treatment to Survivorship      |                                                                                       | Randomized Controlled Trial                            | -                | Patient- & System-Related |
| Socwell C.P <sup>673</sup>      | 2018 | Australia | English  | Article          | Multiple      | Readmission                           |                                                                                       | Prospective Cohort                                     | -                | Patient-Related           |
| Söderberg I <sup>674</sup>      | 2006 | Sweden    | Swedish  | Article          | Multiple      | Multiple                              |    | Cross Sectional Survey Design                          | -                | Patient-Related           |
| Sohl S <sup>675</sup>           | 2023 | USA       | English  | Article          | Any           | -                                     |                                                                                                                                                                          | Single-Group Hybrid Implementation-Effectiveness Pilot | -                | Patient-Related           |
| Soltani M <sup>676</sup>        | 2022 | Iran      | English  | Article          | Any           | Hospital to Home                      |                                                                                       | Time-Series Forecasting Methods                        | -                | System-Related            |
| Somuri S <sup>677</sup>         | 2015 | USA       | English  | Conference       | Breast        | Active Treatment to Survivorship      |                                                                                       | Quality Improvement Project                            | -                | Patient-Related           |
| Sondergaard S.E <sup>678</sup>  | 2013 | Denmark   | English  | Article          | Multiple      | Multiple                              |                                                                                                                                                                          | Cross-Sectional                                        | -                | Patient-Related           |
| Song J <sup>679</sup>           | 2022 | USA       | English  | Article          | Breast        | Diagnosis to Treatment                |                                                                                       | Retrospective Cohort                                   | -                | Patient-Related           |
| Soulia S.L <sup>680</sup>       | 2019 | USA       | English  | Article          | Breast        | Active Treatment to Survivorship      |                                                                                       | Formative Study                                        | -                | Patient-Related           |
| Steele E.M <sup>681</sup>       | 2019 | USA       | English  | Conference       | Cervical      | Diagnosis to Treatment                |                                                                                       | Population-based Study                                 | -                | Patient-Related           |
| Stensland K <sup>682</sup>      | 2022 | USA       | English  | Abstract         | Kidney Cancer | Readmission                           |                                                                                                                                                                          | Retrospective Cohort                                   | -                | Patient-Related           |
| Sterba K <sup>683</sup>         | 2015 | USA       | English  | Article          | Colorectal    | Active Treatment to Posttreatment     |                                                                                                                                                                          | Qualitative Study                                      | -                | Patient-Related           |
| Stiel S <sup>684</sup>          | 2009 | Germany   | German   | Article          | Multiple      | Inpatient to Outpatient               |                                                                                                                                                                          | Qualitative Study                                      | -                | Patient-Related           |
| Stokes W <sup>685</sup>         | 2013 | USA       | English  | Article          | Prostate      | Diagnosis to Treatment                |                                                                                                                                                                          | Cluster Randomized Controlled Trial                    | -                | Patient-Related           |
| Sugumar K <sup>686</sup>        | 2023 | USA       | English  | Article          | -             | Diagnosis to Treatment                |                                                                                       | Retrospective Cohort                                   | 217              | Patient-Related           |
| Suryanarayanan D <sup>687</sup> | 2013 | India     | English  | Article          | Multiple      | Curative Treatment to Palliative Care |                                                                                       | Review                                                 | -                | System-Related            |
| Sussman A <sup>688</sup>        | 2022 | USA       | English  | Abstract         | Two Types     | Active Treatment to Survivorship      |                                                                                                                                                                          | Exploratory Research                                   | -                | Patient-Related           |
| Sussman J <sup>689</sup>        | 2012 | Canada    | English  | Conference       | Multiple      | Multiple                              |                                                                                     | Review                                                 | -                | Patient-Related           |

| Author                     | Year | Country   | Language | Publication Type | Cancer Type                     | TiC                                     | Objectives                                                                                                                                                                  | Study Design                           | # of Patient TiC | Outcome                   |
|----------------------------|------|-----------|----------|------------------|---------------------------------|-----------------------------------------|-----------------------------------------------------------------------------------------------------------------------------------------------------------------------------|----------------------------------------|------------------|---------------------------|
| Sussman J <sup>690</sup>   | 2010 | Canada    | English  | Article          | Multiple                        | Oncology to Primary Care                |                                                                                          | Qualitative Interpretive Description   | -                | System-Related            |
| Sweeny L <sup>691</sup>    | 2023 | USA       | English  | Article          | Head and Neck Cancer            | Discharge                               |                                                                                          | Retrospective Cohort                   | -                | Patient-Related           |
| Swisher A <sup>692</sup>   | 2022 | USA       | English  | Article          | Lung Cancer                     | Active Treatment to Survivorship        |       | Descriptive                            | -                | Patient- & System-Related |
| Tamri Y <sup>693</sup>     | 2022 | Iran      | English  | Article          | Breast Cancer                   | Discharge                               |                                                                                          | Quasi-Experimental                     | -                | Patient-Related           |
| Tan C <sup>694</sup>       | 2015 | Singapore | English  | Article          | Multiple                        | Multiple                                |       | Pilot Study                            | -                | Patient-Related           |
| Tan J <sup>695</sup>       | 2023 | Singapore | English  | Article          | Peritoneal Surface Malignancies | Delays                                  |                                                                                          | Prospective Review                     | -                | Patient-Related           |
| Tan Y <sup>696</sup>       | 2015 | Australia | English  | Article          | Multiple                        | Hospital to Home                        |       | Qualitative Interpretive Description   | -                | System-Related            |
| Tate A <sup>697</sup>      | 2022 | USA       | English  | Article          | Two                             | Transition to End-of-Life Care          |                                                                                          | Conversation Analytic and Ethnographic | -                | Patient- & System-Related |
| Tawfik B <sup>698</sup>    | 2020 | USA       | English  | Abstract         | Multiple                        | Active Treatment to Survivorship        |                                                                                          | Survivorship Care Plan                 | -                | Patient- & System-Related |
| Taylor C <sup>699</sup>    | 2013 | England   | English  | Article          | Colorectal                      | Active Treatment to Survivorship        |                                                                                          | Pilot Randomized Controlled Trial      | -                | Patient-Related           |
| Taylor C <sup>700</sup>    | 2008 | England   | English  | Article          | Colorectal                      | Primary Treatment to Follow-Up Care     |                                                                                          | -                                      | -                | System-Related            |
| Taylor K <sup>701</sup>    | 2013 | Australia | English  | Article          | Lymphoma                        | Active Treatment to Survivorship        |                                                                                          | Qualitative Study                      | -                | Patient- & System-Related |
| Taylor N <sup>702</sup>    | 2022 | UK        | English  | Article          | Head and Neck                   | Oncology to Specialized Palliative Care |                                                                                          | Case Study                             | -                | Patient- & System-Related |
| Tennison J <sup>703</sup>  | 2021 | USA       | English  | Article          | Any                             | Readmission                             |                                                                                        | Retrospective Cohort                   | -                | Patient-Related           |
| Tennison J <sup>704</sup>  | 2021 | USA       | English  | Article          | Multiple                        | Multiple                                |                                                                                        | Prospective Cohort                     | -                | Patient- & System-Related |
| Tepper S <sup>705</sup>    | 2003 | USA       | English  | Article          | Brain                           | Multiple                                |   | Pilot Study                            | -                | Patient-Related           |
| Terrell K <sup>706</sup>   | 2020 | USA       | English  | Conference       | Blood                           | Discharge                               |   | Retrospective Cohort                   | -                | Patient-Related           |
| Thompson J <sup>707</sup>  | 2014 | England   | English  | Article          | Breast                          | Multiple                                |   | Action Research Project                | -                | Patient-Related           |
| Thompson K <sup>708</sup>  | 2009 | Australia | English  | Article          | Multiple                        | Active Therapy to Follow-Up Care        |                                                                                        | Performance Improvement Study          | -                | Patient-Related           |
| Thomsen T.G <sup>709</sup> | 2017 | Denmark   | English  | Article          | Colorectal                      | Active Treatment to Survivorship        |   | Qualitative Interpretive Description   | -                | Patient-Related           |



| Author                          | Year | Country      | Language | Publication Type | Cancer Type                        | TiC                                                     | Objectives                                                                                                                                                                                                                                                  | Study Design                        | # of Patient TiC | Outcome                   |
|---------------------------------|------|--------------|----------|------------------|------------------------------------|---------------------------------------------------------|-------------------------------------------------------------------------------------------------------------------------------------------------------------------------------------------------------------------------------------------------------------|-------------------------------------|------------------|---------------------------|
| Thomson B <sup>710</sup>        | 2015 | USA          | English  | Article          | Blood                              | Multiple                                                |                                                                                                                                                                          | Prospective Cohort                  | -                | Patient-Related           |
| Thon Aamodt I.M. <sup>711</sup> | 2013 | Norway       | English  | Article          | Multiple                           | Discharge                                               |                                                                                                                                                                          | Qualitative Study                   | -                | Patient-Related           |
| Thorne S <sup>712</sup>         | 2012 | Canada       | English  | Article          | Multiple                           | Active Treatment to Survivorship                        |                                                                                       | Qualitative Study                   | -                | Patient-Related           |
| Tillmann B <sup>713</sup>       | 2023 | Canada       | English  | Article          | Multiple                           | Unexpected Post-Operative Intensive Care Unit Admission |                                                                                                                                                                          | Population Cohort                   | -                | Patient-Related           |
| Tola G <sup>714</sup>           | 2017 | USA          | English  | Conference       | Lung                               | Diagnosis to Treatment                                  |                                                                                       | Retrospective Cohort                | -                | Patient-Related           |
| Tolbert E <sup>715</sup>        | 2018 | USA          | English  | Article          | Multiple                           | Active Treatment to Survivorship                        |                                                                                       | Qualitative Study                   | -                | Patient-Related           |
| Tomaszewski J.J. <sup>716</sup> | 2014 | USA          | English  | Conference       | Urothelial Carcinoma               | Diagnosis to Treatment                                  |                                                                                       | Qualitative Study                   | -                | Patient-Related           |
| Tomaszewski J.J. <sup>717</sup> | 2014 | USA          | English  | Article          | Bladder                            | Diagnosis to Treatment                                  |    | Retrospective Cohort                | -                | System-Related            |
| Torres S <sup>718</sup>         | 2015 | USA          | English  | Dissertation     | Multiple                           | Active Treatment to Survivorship                        |                                                                                       | Qualitative Study                   | -                | Patient-Related           |
| Tortorella F <sup>719</sup>     | 2011 | USA          | English  | Article          | Multiple                           | Interhospital                                           |                                                                                                                                                                          | Case Study                          | -                | System-Related            |
| Tralongo P <sup>720</sup>       | 2021 | Italy        | English  | Perspective      | Multiple                           | Active Treatment to Posttreatment                       | -                                                                                                                                                                                                                                                           | -                                   | -                | Patient- & System-Related |
| Trask P.C. <sup>721</sup>       | 2006 | USA          | English  | Article          | Multiple                           | Multiple                                                |                                                                                                                                                                          | Multiple Case Study                 | -                | System-Related            |
| Tremblay D <sup>722</sup>       | 2021 | Canada       | English  | Article          | -                                  | -                                                       |                                                                                                                                                                          | Deliberative Consultation           | -                | System-Related            |
| Tremblay D <sup>723</sup>       | 2016 | Canada       | English  | Article          | Breast                             | Oncology to Primary Care                                |                                                                                       | Case Study                          | -                | Patient-Related           |
| Tremblay D <sup>724</sup>       | 2017 | Canada       | English  | Article          | Multiple                           | Specialized Oncology to Primary Care                    |                                                                                                                                                                          | Comparative Case Study              | -                | System-Related            |
| Trindade L. <sup>725</sup>      | 2022 | N/A          | English  | Article          | -                                  | -                                                       |                                                                                   | Meta-Analysis                       | -                | Patient- & System-Related |
| Truant T.L. <sup>726</sup>      | 2014 | Canada       | English  | Conference       | Multiple                           | Active Treatment to Survivorship Care                   |                                                                                   | Pilot Study                         | -                | Patient-Related           |
| Tsai C <sup>727</sup>           | 2020 | Taiwan       | English  | Article          | Non-Small Cell Lung Cancer (NSCLC) | Diagnosis to Treatment                                  |                                                                                                                                                                        | Retrospective Cohort                | 42,962           | Patient-Related           |
| Tsui J <sup>728</sup>           | 2019 | USA          | English  | Article          | Multiple                           | Primary Care to Oncology                                |                                                                                                                                                                        | Descriptive Cross-Sectional Study   | 42               | Patient-Related           |
| Uitdehaag, M.J. <sup>729</sup>  | 2012 | Netherlands  | English  | Article          | Head and Neck                      | Hospital to Palliative Care                             |                                                                                   | Cross Sectional Questionnaire Study | -                | Patient-Related           |
| Ullgren H <sup>730</sup>        | 2017 | Sweden       | English  | Article          | Head and Neck                      | Oncology to Palliative Care                             |                                                                                                                                                                        | Retrospective Audit                 | 965              | Patient-Related           |
| Umezawa S <sup>731</sup>        | 2015 | Japan        | English  | Article          | Multiple                           | Active Treatment to Palliative Care                     |                                                                                                                                                                        | Survey                              | -                | Patient-Related           |
| Unger-Saldana K <sup>732</sup>  | 2020 | Mexico, Peru | English  | Abstract         | Breast Cancer                      | Treatment Delay                                         |                                                                                                                                                                        | Cross-Sectional                     | 710              | Patient-Related           |

| Author                              | Year | Country       | Language | Publication Type | Cancer Type                                                 | TiC                                     | Objectives                                                                                                                                                                                                                                                        | Study Design                          | # of Patient TiC | Outcome                   |
|-------------------------------------|------|---------------|----------|------------------|-------------------------------------------------------------|-----------------------------------------|-------------------------------------------------------------------------------------------------------------------------------------------------------------------------------------------------------------------------------------------------------------------|---------------------------------------|------------------|---------------------------|
| Urban R <sup>733</sup>              | 2022 | Canada        | English  | Article          | -                                                           | Treatment Delay                         |                                                                                                                                                                                | Retrospective Cohort                  | -                | Patient- & System-Related |
| Valery P <sup>734</sup>             | 2020 | Australia     | English  | Article          | -                                                           | Accessing PHC Service After Diagnosis   |                                                                                                                                                                                | Retrospective Cohort                  | 115              | Patient- & System-Related |
| Van Den Berg K <sup>735</sup>       | 2022 | Netherlands   | English  | Conference       | -                                                           | Diagnosis to Treatment                  |                                                                                             | Mixed-Methods                         |                  | Patient-Related           |
| Van den Block L <sup>736</sup>      | 2017 | Belgium       | English  | Article          | Lung                                                        | Multiple                                |                                                                                             | Retrospective Follow-Back Study       | -                | Patient-Related           |
| Van der Plas A <sup>737</sup>       | 2019 | Netherlands   | English  | Article          | Multiple                                                    | Hospital to Home                        |                                                                                             | Retrospective Cohort                  | -                | Patient-Related           |
| Van Hemelrijck M <sup>738</sup>     | 2017 | England       | English  | Article          | Prostate                                                    | Active Surveillance to Watchful Waiting |                                                                                             | Modelling                             | 83               | Patient-Related           |
| Van Overveld <sup>739</sup>         | 2018 | Netherlands   | English  | Article          | Head and Neck                                               | Multiple                                |                                                                                                                                                                                | Narrative Review                      | -                | Patient-Related           |
| Van Tol F <sup>740</sup>            | 2022 | Netherlands   | English  | Article          | Spinal Metastases                                           | Treatment Delay                         |                                                                                                                                                                                | Retrospective Cohort                  | 299              | System-Related            |
| Van Tol F <sup>741</sup>            | 2023 | Netherlands   | English  | Article          | Spinal Metastases and Spinal Tumors from Blood Malignancies | Delays                                  |                                                                                                                                                                                | Retrospective Cohort                  | -                | Patient- & System-Related |
| Vanhuyse, M <sup>742</sup>          | 2007 | Canada        | English  | Article          | Breast                                                      | Oncologist to Family Physician          |                                                                                                                                                                                | Retrospective Review                  | -                | Patient-Related           |
| Vaswani S <sup>743</sup>            | 2023 | USA           | English  | Article          | Any                                                         | -                                       |                                                                                                                                                                                | Retrospective Chart Review            | -                | System-Related            |
| Vazquez-Calatayud, M <sup>744</sup> | 2010 | Spain         | English  | Conference       | Breast                                                      | Active Treatment to Survivorship        |                                                                                             | Narrative Review                      | -                | Patient-Related           |
| Verhoef MJ <sup>745</sup>           | 2020 | Netherlands   | English  | Article          | Any                                                         | Multiple                                |                                                                                             | Retrospective Cohort                  | -                | Patient-Related           |
| Voigt L <sup>746</sup>              | 2009 | USA           | English  | Article          | Multiple                                                    | Intrahospital                           |                                                                                         | Mixed Methods Study                   | -                | Patient-Related           |
| Vos J <sup>747</sup>                | 2021 | Netherlands   | English  | Article          | Multiple                                                    | Treatment to Follow-Up Care             |                                                                                                                                                                              | Pragmatic Randomized Controlled Trial | -                | Patient-Related           |
| Wagle N <sup>748</sup>              | 2023 | United States | English  | Article          | Hepatocellular Carcinoma                                    | Treatment Delay                         |                                                                                                                                                                              | Retrospective Cohort                  | 8,450            | Patient-Related           |
| Wallner L <sup>749</sup>            | 2021 | United States | English  | Article          | Breast Cancer                                               | Transition to Survivorship              |                                                                                                                                                                              | Pilot Randomized Controlled Trial     | -                | Patient- & System-Related |
| Walsh C <sup>750</sup>              | 2019 | USA           | English  | Conference       | Multiple                                                    | Active Treatment to Survivorship        |                                                                                         | Qualitative Study                     | -                | Patient- & System-Related |
| Walsh C <sup>751</sup>              | 2019 | USA           | English  | Article          | Acute Lymphoblastic Leukemia                                | Active Treatment to Survivorship        |                                                                                                                                                                              | Prospective Cohort                    | -                | Patient-Related           |
| Walsh J <sup>752</sup>              | 2010 | Australia     | English  | Article          | Multiple                                                    | Multiple                                |    | Qualitative Study                     | -                | Patient-Related           |

| Author                     | Year | Country     | Language | Publication Type | Cancer Type                     | TiC                                                                    | Objectives | Study Design                            | # of Patient TiC | Outcome                   |
|----------------------------|------|-------------|----------|------------------|---------------------------------|------------------------------------------------------------------------|------------|-----------------------------------------|------------------|---------------------------|
| Walsh R <sup>753</sup>     | 2021 | Canada      | English  | Article          | Breast Cancer                   | Primare Care Provider Continuity                                       | ■ ■        | Retrospective Cohort                    | -                | Patient- & System-Related |
| Wang C.Y <sup>754</sup>    | 2019 | USA         | English  | Article          | Pancreatic Cancer               | Readmission                                                            | ■ ■        | Retrospective Cohort                    | 758              | Patient-Related           |
| Wang G.L <sup>755</sup>    | 2013 | Taiwan      | English  | Conference       | Breast                          | Active Treatment to Survivorship                                       | ■ ■        | -                                       | -                | System-Related            |
| Wang W <sup>756</sup>      | 2023 | USA         | English  | Article          | Multiple                        | Readmission                                                            | ■ ■        | Retrospective Cohort                    | -                | Patient-Related           |
| Wang Y <sup>757</sup>      | 2016 | Canada      | English  | Conference       | Multiple                        | Active Treatment to Survivorship                                       | ■ ■        | Survey                                  | 53               | Patient-Related           |
| Ward W <sup>758</sup>      | 2020 | USA         | English  | Article          | Ductal Carcinoma in Situ        | Multiple                                                               | ■ ■        | Retrospective Cohort                    | -                | Patient-Related           |
| Warde P <sup>759</sup>     | 2022 | USA         | English  | Abstract         | Any                             | Outpatient to Office Setting                                           | ■          | Retrospective Cohort                    | -                | System-Related            |
| Warren K <sup>760</sup>    | 2020 | USA         | English  | Article          | Grade III Or IV Glioma          | Discharge                                                              | ■          | Retrospective Cohort                    | 291              | Patient-Related           |
| Warsame R <sup>761</sup>   | 2016 | USA         | English  | Article          | Blood                           | Discharge                                                              | ■ ■        | Chart Review                            | 500              | Patient-Related           |
| Wathne H <sup>762</sup>    | 2023 | Norway      | English  | Article          | Colorectal Cancer               | Discharge                                                              | ■ ■        | Qualitative Study                       | -                | Patient- & System-Related |
| Weda S <sup>763</sup>      | 2023 | Netherlands | English  | Article          | Testicular Germ Cell Tumor      | Follow-Up Care to Long-Term Survivorship                               | ■          | Qualitative Study                       | 12               | Patient-Related           |
| Wee C <sup>764</sup>       | 2017 | USA         | English  | Conference       | Multiple                        | Interhospital                                                          | ■          | -                                       | 26               | Patient-Related           |
| Wee C <sup>765</sup>       | 2017 | USA         | English  | Article          | Multiple                        | Multiple                                                               | ■ ■        | Position Statement                      | -                | Patient-Related           |
| Wellman C <sup>766</sup>   | 2023 | USA         | English  | Article          | -                               | Readmission                                                            | ■ ■        | Retrospective Cohort                    | -                | Patient-Related           |
| White K <sup>767</sup>     | 2021 | Australia   | English  | Article          | Any Solid Tumour                | Unplanned Hospital Admission                                           | ■          | Prospective Randomized Controlled Trial | -                | Patient- & System-Related |
| Wield A <sup>768</sup>     | 2022 | USA         | English  | Article          | Minimally Invasive Hysterectomy | Same Day Hospital Discharge Transition Outcomes                        | ■          | Retrospective Cohort                    | -                | Patient- & System-Related |
| Wijeratne A <sup>769</sup> | 2016 | England     | English  | Conference       | Multiple                        | Hospice to Hospital                                                    | ■          | -                                       | -                | Patient-Related           |
| Wilkins J.L <sup>770</sup> | 2014 | Canada      | English  | Article          | Multiple                        | Multiple                                                               | ■          | Environmental Scan                      | -                | System-Related            |
| Wilkinson L <sup>771</sup> | 2022 | -           | English  | Conference       | Multiple                        | Hospital to Palliative Care                                            | ■          | Retrospective Cohort                    | -                | Patient- & System-Related |
| Wilson E <sup>772</sup>    | 2019 | Ireland     | English  | Dissertation     | Breast                          | Active Treatment to Survivorship                                       | ■          | Qualitative Study                       | -                | System-Related            |
| Wind L <sup>773</sup>      | 2021 | USA         | English  | Article          | Blood                           | Patients Referred to Inpatient Hematology/Oncology Hospitalist Service | ■          | Retrospective Quality Improvement       | 28               | Patient- & System-Related |
| Wittal D <sup>774</sup>    | 2017 | England     | English  | Conference       | Multiple                        | Active Treatment to Community Setting                                  | ■ ■        | Review                                  | -                | System-Related            |
| Wittal D <sup>775</sup>    | 2018 | Canada      | English  | Article          | Multiple                        | Oncology to Community Setting                                          | ■          | Environmental Scan                      | 6                | Patient-Related           |

| Author                      | Year | Country     | Language | Publication Type | Cancer Type                | TiC                                       | Objectives | Study Design                | # of Patient TiC | Outcome                   |
|-----------------------------|------|-------------|----------|------------------|----------------------------|-------------------------------------------|------------|-----------------------------|------------------|---------------------------|
| Wong G <sup>776</sup>       | 2023 | USA         | English  | Abstract         | Meningioma                 | Readmission, LTF                          | ■          | Retrospective Cohort        | 99               | Patient-Related           |
| Wood S.K <sup>777</sup>     | 2018 | USA         | English  | Article          | Multiple                   | Active Treatment to Survivorship          | ■          | Concept Analysis            | -                | System-Related            |
| Woods A <sup>778</sup>      | 2019 | England     | English  | Article          | Breast                     | Discharge                                 | ■ ■ ■      | Qualitative Study           | -                | Patient-Related           |
| Xiang J <sup>779</sup>      | 2022 | USA         | English  | Article          | Any                        | Readmission                               | ■ ■        | Retrospective Cohort        | 25,135           | Patient- & System-Related |
| Xiong D <sup>780</sup>      | 2022 | USA         | English  | Article          | Invasive Melanoma          | Treatment Delay on Mortality              | ■          | Retrospective Cohort        | 108,689          | Patient-Related           |
| Xu S <sup>781</sup>         | 2023 | USA         | English  | Article          | Multiple                   | Transition From Treatment                 | ■          | Randomized Controlled Trial | -                | Patient- & System-Related |
| Xu W <sup>782</sup>         | 2023 | New Zealand | English  | Article          | Colorectal Cancer          | Readmission                               | ■          | Retrospective Cohort        | 16,885           | Patient-Related           |
| Xu Y <sup>783</sup>         | 2023 | China       | English  | Article          | Lung Cancer                | Two-Day Discharge                         | ■          | Retrospective Cohort        | 10,834           | Patient-Related           |
| Xu Y <sup>784</sup>         | 2020 | Singapore   | English  | Article          | Multiple                   | Readmission                               | ■          | Retrospective Case-Control  | 312              | Patient-Related           |
| Yang J <sup>785</sup>       | 2020 | China       | English  | Article          | Colorectal                 | Discharge                                 | ■          | Cross-Sectional             | 130              | Patient-Related           |
| Yates P <sup>786</sup>      | 2022 | Australia   | English  | Article          | -                          | Survivorship                              | ■          | Prospective Cohort          | -                | Patient- & System-Related |
| Ye A.Y <sup>787</sup>       | 2015 | Canada      | English  | Article          | Multiple                   | Active Treatment to Follow-Up Care        | ■          | Survey                      | -                | Patient-Related           |
| Yee S <sup>788</sup>        | 2021 | England     | English  | Abstract         | Bladder Cancer             | Referral to Definitive Treatment          | ■          | Retrospective Cohort        | 42               | Patient- & System-Related |
| Yin C.H <sup>789</sup>      | 2020 | Taiwan      | English  | Article          | Head and Neck Cancer       | Readmission                               | ■          | Retrospective Cohort        | -                | Patient- & System-Related |
| Yung R <sup>790</sup>       | 2020 | USA         | English  | Article          | Breast Cancer              | Treatment Delay                           | ■          | Retrospective Cohort        | 3,368            | Patient-Related           |
| Yurdakul A.S <sup>791</sup> | 2015 | Turkey      | English  | Article          | Lung                       | Multiple                                  | ■ ■        | Prospective Cohort          | -                | Patient-Related           |
| Zahfir H <sup>792</sup>     | 2022 | Morocco     | English  | Article          | Breast Cancer              | Multiple                                  | ■          | Cross-Sectional             | -                | Patient-Related           |
| Zanet E <sup>793</sup>      | 2014 | Italy       | English  | Correspondence   | Multiple                   | Cancer Survivor Clinics to Other Settings | ■ ■        | -                           | -                | Patient- & System-Related |
| Zaveri S <sup>794</sup>     | 2022 | USA         | English  | Article          | Breast Cancer              | Time to Treatment                         | ■ ■ ■      | Retrospective Cohort        | -                | Patient-Related           |
| Zhang J <sup>795</sup>      | 2022 | Australia   | English  | Article          | Lung                       | Diagnosis to Treatment                    | ■          | Overview                    |                  | Patient- & System-Related |
| Zhang Y <sup>796</sup>      | 2021 | USA         | English  | Abstract         | Non-Small Cell Lung Cancer | Treatment Delay                           | ■          | Retrospective Cohort        | 1,179            | Patient-Related           |
| Zhao C <sup>797</sup>       | 2022 | USA         | English  | Article          | Bladder Cancer             | Discharge Either to Home or Not           | ■          | Retrospective Cohort        | 11,307           | System-Related            |
| Zhao H <sup>798</sup>       | 2020 | China       | English  | Article          | Laryngeal Cancer           | Discharge Readiness                       | ■          | Cross-Sectional             | 212              | Patient-Related           |
| Zibelli A <sup>799</sup>    | 2020 | USA         | English  | Article          | Any                        | Readmission                               | ■          | Qualitative                 | 13               | Patient-Related           |

| Author                    | Year | Country | Language | Publication Type | Cancer Type   | TiC                                                            | Objectives | Study Design         | # of Patient TiC | Outcome         |
|---------------------------|------|---------|----------|------------------|---------------|----------------------------------------------------------------|------------|----------------------|------------------|-----------------|
| Zu K <sup>800</sup>       | 2021 | USA     | English  | Article          | Any           | Unplanned Transfer to Acute Care from Oncologic Rehab Services | ■          | Retrospective Cohort | 330              | Patient-Related |
| Zullig L.L <sup>801</sup> | 2018 | England | English  | Article          | Head and Neck | Active Treatment to Follow-Up Care                             | ■ ■        | Qualitative Study    | -                | Patient-Related |

Footnote: Article=peer-reviewed article; conference=conference proceeding

- Patient, family, carer, and healthcare provider perspectives on TiC
- Examination of risk factors, covariates, protocols or frequency of TiC
- Examination or description of care profiles, or patient characteristics
- Analysis of patient, family, or healthcare provider's needs during TiC
- Analysis of delays (frequency, risk factors, length and effect on patient outcomes)
- Evaluation, review or implementation of an intervention or program
- Description, review or analysis focussed on continuity of care
- Examination of adverse events or patient outcomes related TiC
- Examination of economics (cost or cost-effectiveness) related to TiC

1. Aaltonen M, Forma L, Pulkki J, Raitanen J, Rissanen P, Jylha M. Changes in older people's care profiles during the last 2 years of life, 1996-1998 and 2011-2013: A retrospective nationwide study in Finland. *BMJ Open*. 2017;7(11):e015130.
2. Abd El Aziz MA, Grass F, Behm KT, et al. How skilled are skilled facilities? Post-discharge complications after colorectal cancer surgery in the U.S. *American journal of surgery*. 2021;222(1):20-26.
3. Abdulaal A, Arhi C, Murphy J, Ziprin P. Diagnostic and treatment delays do not impact survival in colorectal cancer patients. *Colorectal Disease*. 2018;20(Supplement 4):25.
4. Abelson JS, Chait A, Shen MJ, Charlson M, Dickerman A, Yeo HL. Sources of distress among patients undergoing surgery for colorectal cancer: A qualitative study. *Journal of Surgical Research*. 2018;226((Yeo) Department of Public Health, Weill Medical College of Cornell University, New York-Presbyterian Hospital, New York, New York, United States):140-149.
5. Abitbol J, Kucukyazici B, Brin S, et al. Impact of robotic surgery on patient flow and resource use intensity in ovarian cancer. *Journal of robotic surgery*. 2023;17(2):537-547.
6. AbuSara AK, Nazer LH, Hawari FI. ICU readmission of patients with cancer: Incidence, risk factors and mortality. *Journal of critical care*. 2019;51(buy, 8610642):84-87.
7. Acher AW, Squires MH, Fields RC, et al. Can the risk of non-home discharge after resection of gastric adenocarcinoma be predicted: A seven-institution study of the us gastric cancer collaborative. *Journal of gastrointestinal surgery : official journal of the Society for Surgery of the Alimentary Tract*. 2015;19(2):207-216.
8. Adam R, Watson E. The role of primary care in supporting patients living with and beyond cancer. *Current opinion in supportive and palliative care*. 2018;12(3):261-267.
9. Adams SV, Bansal A, Burnett-Hartman AN, et al. Cancer treatment delays in American Indians and Alaska Natives enrolled in medicare. *Journal of health care for the poor and underserved*. 2017;28(1):350-361.
10. Adewuyi-Dalton R, Ziebland S, Grunfeld E, Hall A. Patients' views of routine hospital follow-up: A qualitative study of women with breast cancer in remission. *Psycho-Oncology*. 1998;7(5):436-439.
11. Adolfsson K, Kreicbergs U, Bratthall C, Holmberg E, Bjork-Eriksson T, Stenmarker M. Referral of patients with cancer to palliative care: Attitudes, practices and work-related experiences among Swedish physicians. *European journal of cancer care*. 2022;31(6):e13680.
12. Ahle G, Debliquis A, Guison J, et al. Tic-tac-toe: A tactic to reduce in-hospital treatment delay of primary cns lymphoma. *Oncology Research and Treatment*. 2018;41(Supplement 1):114.
13. Aihie N, Kwon D, Mason M, et al. Predictors of discharge to home following major surgery for urologic malignancies. *Journal of Urology*. 2022;207(SUPPL 5):e283.
14. Aitini E, Orsi L, Vescovi PP. [from treatment to palliative care: Difficult news in oncology]. *Recenti progressi in medicina*. 2012;103(2):72-73.
15. Ajay PS, Sok CP, Goyal S, et al. Time to first treatment and optimal adjuvant treatment strategy in resectable gastric cancer patients pathologically upstaged to lymph node positive disease. *Annals of surgical oncology*. 2023;30(Supplement 1):S161.
16. Ajrouch A, Jennewein L, Li Y, Pike F, Hanna NH. The association of social and demographic factors on the time interval between a suspected diagnosis of cancer, diagnosis, treatment, and outcomes in a lung cancer patient population. *Journal of Clinical Oncology*. 2022;40(16 Supplement 1).
17. Alam E, Wilson RD, Vargo MM. Inpatient cancer rehabilitation: A retrospective comparison of transfer back to acute care between patients with neoplasm and other rehabilitation patients. *Archives of Physical Medicine and Rehabilitation*. 2008;89(7):1284-1289.
18. Alanen V, Koivunen JP. Association of diagnostic delays to survival in lung cancer: Single center experience. *Acta Oncologica*. 2019;58(7):1056-1061.

19. Alawawdeh A, Tomita Y, Vy B, Tim P, Rachel RT, Amanda T. Transition of inpatient oncology patients to supportive or palliative care services; a single institution experience. *Asia-Pacific journal of clinical oncology*. 2021;17(SUPPL 9):116.
20. Alfano CM, Oeffinger K, Sanft T, Tortorella B. Engaging team medicine in patient care: Redefining cancer survivorship from diagnosis. *American Society of Clinical Oncology educational book American Society of Clinical Oncology Annual Meeting*. 2022;42:1-11.
21. Alizadeh Z, Rohani C, Rassouli M, Ilkhani M, Hazrati M. Transitional cancer care program from hospital to home in the health care system of Iran. *Asian Pacific journal of cancer prevention : APJCP*. 2021;22(4):1231-1237.
22. Almaawiy U, Pond GR, Sussman J, Brazil K, Seow H. Are family physician visits and continuity of care associated with acute care use at end-of-life? A population-based cohort study of homecare cancer patients. *Palliative Medicine*. 2014;28(2):176-183.
23. Alvaro-Meca A, Kneib T, Prieto RG, de Miguel AG. Impact of comorbidities and surgery on health related transitions in pancreatic cancer admissions: A multi state model. *Cancer epidemiology*. 2012;36(2):e142-146.
24. Alves Soares Ferreira N, Melo Figueiredo de Carvalho S, Engracia Valenti V, et al. Treatment delays among women with breast cancer in a low socio-economic status region in Brazil. *BMC Women's Health*. 2017;17(1):13.
25. Alyabsi M, Charlton M, Meza J, Islam KMM, Soliman A, Watanabe-Galloway S. Comparison of urban-rural readmission rates after colorectal cancer surgery: Findings from a privately insured population. *Cancer control : journal of the Moffitt Cancer Center*. 2021;28:10732748211027169.
26. Alyabsi MS, Alqarni AH, Almutairi LM, et al. The 30-day hospital readmission and mortality after surgery in colorectal cancer patients. *BMC gastroenterology*. 2022;22(1):434.
27. Anderson AJ, Starkweather A, Cong X, et al. A descriptive survey study of patient needs and preferences for cancer pain self-management support. *Oncology nursing forum*. 2022;49(1):46-57.
28. Anderson ML, Cui Y, Daheri M, et al. Impact of a multifaceted program targeting key transitions in care on cervical cancer screening within a high-volume safety net health system. *Gynecologic Oncology*. 2016;141(SUPPL. 1):25.
29. Ang WHD, Lang SP, Ang E, Lopez V. Transition journey from hospital to home in patients with cancer and their caregivers: A qualitative study. *Supportive Care in Cancer*. 2016;24(10):4319-4326.
30. Angarita FA, Jedrzejko N, Eisen D, Muraca M, Ash M, Osman F. Primary care physicians' perspectives in leading breast cancer follow-up care. *Clinical breast cancer*. 2022;22(4):e497-e505.
31. Anonymous, National Guideline C. Evidence review: Optimal transition and facilitating discharge: End of life care for adults: Service delivery: Evidence review m. 2019.
32. Aoyanagi M, Shindo Y, Takahashi K. General ward nurses' self-efficacy, ethical behavior, and practice of discharge planning for end-stage cancer patients: Path analysis. *Healthcare (Basel, Switzerland)*. 2022;10(7).
33. Arientyl V, Friedmann P, Weithorn D, In H. 896 timely coordination and treatment for colorectal cancers diagnosed in the emergency department. *Gastroenterology*. 2020;158(6 Supplement 1):S-1538.
34. Asher A, Roberts PS, Bresee C, Zabel G, Riggs RV, Rogatko A. Transferring inpatient rehabilitation facility cancer patients back to acute care (tripbac). *PM & R : the journal of injury, function, and rehabilitation*. 2014;6(9):808-813.
35. Aubert CE, Schnipper JL, Williams MV, et al. Simplification of the hospital score for predicting 30-day readmissions. *BMJ quality & safety*. 2017;26(10):799-805.

36. Aubin M, Vezina L, Verreault R, et al. Continuity of cancer care and collaboration between family physicians and oncologists: Results of a randomized clinical trial. *Annals of family medicine*. 2021;19(2):117-125.
37. Aubin M, Carriere M, St-Pierre M, Lagrange V. Collaboration challenges in the transition from curative to palliative care for patients with colorectal cancer. *Palliative Medicine*. 2012;26(4):529.
38. Aubin M, Giguere A, Martin M, et al. Interventions to improve continuity of care in the follow-up of patients with cancer. *Cochrane database of systematic reviews (Online)*. 2012;7((Aubin) Department of Family Medicine and Emergency Medicine, Universite Laval, Quebec city, Canada.):CD007672.
39. Aubin M, Vezina L, Verreault R, et al. Family physician perception of the usefulness of an intervention to improve continuity of cancer care. *Canadian Family Physician*. 2015;61(2 Supplement 1):S44.
40. Anun ST, Wallgren GC, Hansen BS. Breast cancer survivors' experiences of dealing with information during and after adjuvant treatment: A qualitative study. *Journal of Clinical Nursing*. 2019;28(15-16):3012-3020.
41. Axelsen KR, Nafei H, Jakobsen SF, Gandrup P, Knudsen JL. Case managers experience improved trajectories for cancer patients after implementation of the case manager function. *Ugeskrift for laeger*. 2015;177(24):1175-1177.
42. Back AL, Anderson WG, Bunch L, et al. Communication about cancer near the end of life. *Cancer*. 2008;113(7 Suppl):1897-1910.
43. Back AL. How should physicians communicate the transition to palliative care? *Nature clinical practice Oncology*. 2005;2(3):136-137.
44. Bahler C, Napflin M, Scherer M, Blozik E. Continuity of care and treatment intensity at the end of life in swiss cancer patients. *European journal of public health*. 2023;33(3):396-402.
45. Bahler C, Signorell A, Blozik E, Reich O. Intensity of treatment in Swiss cancer patients at the end-of-life. *Cancer management and research*. 2018;10(101512700):481-491.
46. Bain NSC, Campbell NC. Treating patients with colorectal cancer in rural and urban areas: A qualitative study of the patients' perspective. *Family Practice*. 2000;17(6):475-479.
47. Baird H, Patterson P, Medlow S, Allison KR. Understanding and improving survivorship care for adolescents and young adults with cancer. *Journal of Adolescent and Young Adult Oncology*. 2019;8(5):581-586.
48. Balentine CJ, Artinyan A, Mason M, et al. Transitional care needs predict worse survival after cancer surgery. *Annals of Surgical Oncology*. 2015;22(1 SUPPL. 1):S139-S140.
49. Balogh LC, Matthews TW, Schrag C, Elebro KA. Clinical outcomes of head and neck cancer patients who refuse curative therapy in pursuit of alternative medicine. *Laryngoscope investigative otolaryngology*. 2021;6(5):991-998.
50. Banala S, Gonzalez CE, Brito-Dellan N, et al. Safer transitions of care at a major cancer center: The emergency center to hospitalist experience. *Journal of Clinical Oncology*. 2016;34(7 SUPPL. 1).
51. Baranowski MLH, Yeung H, Chen SC, Gillespie TW, Goodman M. Factors associated with longer time to surgical treatment in melanoma. *Cancer Epidemiology Biomarkers and Prevention*. 2020;29(6 SUPPL 1).
52. Barbaro M, Pan P, Torres S, Thakur K, Welch M. Factors associated with treatment delay in central nervous system lymphoma. *Neuro-oncology*. 2019;21(Supplement 6):vi117.
53. Barnett M, Shaw T. What do consumers see as important in the continuity of their care? *Supportive Care in Cancer*. 2013;21(9):2637-2642.



54. Bashkin O, Asna N, Amoyal M, Dopelt K. The role of nurses in the quality of cancer care management: Perceptions of cancer survivors and oncology teams. *Seminars in oncology nursing*. 2023;151423.
55. Bates C, Bamigbola F, Warwick L. Impact of ageing on the survivorship experiences of patients with hodgkin lymphoma. *HemaSphere*. 2022;6(Supplement 5):33.
56. Bazzett-Matabele L, Ruzindana K, Ntirushwa D, Ntasumbumuyange D, Rulisa S, Ghebre R. Coordination of gynecologic cancer care in Rwanda: Addressing geographical barriers. *International Journal of Gynecology and Obstetrics*. 2018;143(Supplement 3):433.
57. Beadle BM, Burke L, Hessel AC. Continuity of care: A program for multidisciplinary post-treatment surveillance after definitive treatment for head and neck cancer. *Journal of Clinical Oncology*. 2014;32(30\_suppl):82-82.
58. Beatty S, Penn J, O'Donnell M, Villwock J. Qualitative study assessing factors for 30-day readmissions: A head and neck oncology cohort. *The Annals of otology, rhinology, and laryngology*. 2023;34894221147809.
59. Beaver K, Latif S, Williamson S, et al. An exploratory study of the follow-up care needs of patients treated for colorectal cancer. *J Clin Nurs*. 2010;19(23-24):3291-3300.
60. Bell D, Morash C, Dranitsaris G, et al. Does prolonging the time to testicular cancer surgery impact long-term cancer control: A systematic review of the literature. *The Canadian journal of urology*. 2006;13 Suppl 3((Bell, Morash, Dranitsaris, Izawa, Short, Klotz, Fleshner) Dalhousie University, Halifax, Nova Scotia, Canada.):30-36.
61. Bender JL, Wiljer D, Sawka AM, Tsang R, Alkazaz N, Brierley JD. Thyroid cancer survivors' perceptions of survivorship care follow-up options: A cross-sectional, mixed-methods survey. *Supportive Care in Cancer*. 2016;24(5):2007-2015.
62. Benthien K, Diasso P, von Heymann A, et al. Oncology to specialised palliative home care systematic transition: The domus randomised trial. *BMJ supportive & palliative care*. 2020;10(3):350-357.
63. Bhakta A, Roy I, Huang K, Spangenberg J, Jayabalan P. Factors associated with unplanned transfers among cancer patients at a freestanding acute rehabilitation facility. *PM and R*. 2022;14(9):1037-1043.
64. Bhattacharya M, Graziano R, Wahal E, et al. Supporting high-risk oncology patients with an outpatient transitional care management program. *Journal of Clinical Oncology*. 2022;40(28 Supplement):313.
65. Bhutiani N, Hicks AC, Huang B, et al. Identifying factors influencing delays in breast cancer treatment in Kentucky following the 2014 medicaid expansion. *Journal of surgical oncology*. 2020;121(8):1191-1200.
66. Birken SA, Peluso A, Wagi C, Wentworth S, Weaver KE. Feasibility and preliminary effectiveness of a cancer survivorship care delivery intervention. *Journal of Clinical Oncology*. 2021;39(28 SUPPL).
67. Blanchard G, Bonaventura A, Dafters N, et al. The impact of integrating an oncology nurse practitioner into an acute care hospital emergency department: An australian tertiary cancer centre experience. *Journal of Clinical Oncology*. 2020;38(15).
68. Bleicher RJ, Chang C, Wang CE, et al. Treatment delays from transfers of care and their impact on breast cancer quality measures. *Breast Cancer Research and Treatment*. 2019;173(3):603-617.
69. Bodurka DC, Aiss MA, Phu HP, et al. Improving transitions of care through implementation of a standardized handoff at a comprehensive cancer center. *Journal of Clinical Oncology*. 2016;34(7 SUPPL. 1).
70. Boer H, Lubberts S, Bunskoek S, et al. Shared-care survivorship program for testicular cancer patients: Safe and feasible. *ESMO open*. 2022;7(3):100488.
71. Boman LE. Encounters for learning and participation in breast cancer care. *Dissertation Abstracts International: Section B: The Sciences and Engineering*. 2022;83(5-B):No-Specified.

72. Bone AE, Gao W, Gomes B, et al. Factors associated with transition from community settings to hospital as place of death for adults aged 75 and older: A population-based mortality follow-back survey. *Journal of the American Geriatrics Society*. 2016;64(11):2210-2217.
73. Boyd K, Murray SA. Recognising and managing key transitions in end of life care. *BMJ (Online)*. 2010;341(7774):649-652.
74. Brant JM, Blaseg K, Aders K, Oliver D, Gray E, Dudley WN. Navigating the transition from cancer care to primary care: Assistance of a survivorship care plan. *Oncology nursing forum*. 2016;43(6):710-719.
75. Brao I, Arellano M, Fernandez P. Role of the advanced practice nurse (apn) in a functional unit for lung cancer at the catalan institute of oncology. *Annals of Oncology*. 2019;30(Supplement 5):v850.
76. Breitkopf CR, Stephens EK, Jatoi A. Hospice in end-of-life patients with cancer: Does it lead to changes in nonhospice health care utilization after stopping cancer treatment? *American Journal of Hospice & Palliative Medicine*. 2014;31(4):392-395.
77. Brennan-Cook J, Bonnabeau E, Harris-Bloom H, Tanabe P. Improving the care of individuals with sickle cell disease in the emergency department using a quality improvement framework: The emergency department sickle cell assessment of needs and strengths (ed-scans). *Adv Emerg Nurs J*. 2019;41(3):261-270.
78. Bridge E, Gotlib Conn L, Dhanju S, Singh S, Moody L. The patient experience of ambulatory cancer treatment: A descriptive study. *Current Oncology*. 2019;26(4):e482-e493.
79. Brinkerhoff BT, Choong NW, Massey BL, et al. Diagnosis to treatment interval and outcome in patients with locally-advanced squamous cell carcinoma of the head and neck in a veterans affairs medical center. *Journal of Cancer Science and Therapy*. 2012;4(5):111-115.
80. Bristol AA, Elmore CE, Weiss ME, et al. Mixed-methods study examining family carers' perceptions of the relationship between intrahospital transitions and patient readiness for discharge. *BMJ Quality & Safety*. 2022:bmjqs-2022-015120.
81. Brockopp DA, Moe K, Schreiber JA, Warden S. Transitions throughout the cancer experience: Diagnosis, treatment, survivorship, and end of life. *Handbook of stressful transitions across the lifespan*. 2010(Yu Ko, W., & Sawatzky, J. A. (2008). Understanding urinary incontinence after radical prostatectomy: A nursing framework. *Clinical Journal of Oncology Nursing*, 12(4), 647-654.):355-366.
82. Broglia CMG, Bramanti A, Gandini C, Danesini C, Pilo S, Pedrazzoli P. Specialist palliative care advice for advanced oncological patients in acute care setting: The experience of san matteo foundation, pavia. *Palliative Medicine*. 2016;30(6):NP291.
83. Broussard CS. Care transitions in outpatient cancer settings: Processes and social work roles. *Dissertation Abstracts International Section A: Humanities and Social Sciences*. 2017;78(4-A(E)):No-Specified.
84. Bryant-Lukosius D, Carter N, Reid K, et al. The clinical effectiveness and cost-effectiveness of clinical nurse specialist-led hospital to home transitional care: A systematic review. *Journal of Evaluation in Clinical Practice*. 2015;21(5):763-781.
85. Buac NP, Khusid JA, Sturgis MR, et al. Disparities in patient and system factors explain racial/ethnic disparities in delayed time to treatment in muscle invasive bladder cancer. *Urologic oncology*. 2022;40(7):343.e315-343.e320.
86. Budde H, Williams GA, Scarpetti G, Kroezen M, Maier CB. What are patient navigators and how can they improve integration of care? 2022.
87. Burg MA, Lopez EDS, Dailey A, Keller ME, Prendergast B. The potential of survivorship care plans in primary care follow-up of minority breast cancer patients. *Journal of General Internal Medicine*. 2009;24(Suppl 2):S467-S471.
88. Burhenn P, Sun C-L, Scher KS, et al. Predictors of hospital readmission among older adults with cancer. *Journal of geriatric oncology*. 2020;11(7):1108-1114.

89. Burkart M, Swisher A, Starkey A, Kennedy-Rea S, Duckworth A. Bridging the gap from active treatment to survivorship: Unmet physical therapy needs of lung cancer survivors. *Cardiopulmonary Physical Therapy Journal*. 2019;30(1):e5.
90. Burke NJ, Napoles TM, Banks PJ, Orenstein FS, Luce JA, Joseph G. Survivorship care plan information needs: Perspectives of safety-net breast cancer patients. *PLoS ONE*. 2016;11(12).
91. Burke O, Levine SK, Mir N, Gleason LJ. Transitions of care for advanced cancer in post-acute and long-term care. *Journal of the American Geriatrics Society*. 2023;71(5):1680-1684.
92. Butcon JV, Chan EA. Unpacking the meaning of "transitional palliative care": From the lens of the older persons and their carers. *Journal of Hospice & Palliative Nursing*. 2017;19(5):487-497.
93. Butt CM. Hope in patients with cancer transitioning to survivorship: The mid-life directions workshop as a supportive intervention. *Oncology nursing forum*. 2012;39(3):E269-274.
94. Büyüktür AG, Ackerman MS. Issues and opportunities in transitions from speciality care: A field study of bone marrow transplant. *Behaviour & Information Technology*. 2015;34(6):566-584.
95. Cacciamani GE, Lee RS, Yip W, et al. Impact of patient, surgical, and perioperative factors on discharge disposition after radical cystectomy for bladder cancer. *Journal of Urology*. 2021;206(SUPPL 3):e245.
96. Camateros P, Wang Y, Cheung WY. Young adult cancer survivors' expectations of physicians for follow-up and general health care: Implications for health services delivery. *Journal of Clinical Oncology*. 2015;33(15 SUPPL. 1).
97. Camp L, Coffman E, Chinthapatla J, et al. Active treatment to survivorship care: A mixed-methods study exploring resource needs and preferences of young adult cancer survivors in transition. *Journal of adolescent and young adult oncology*. 2023.
98. Canzona MR, Love D, Barrett R, et al. "Operating in the dark": Nurses' attempts to help patients and families manage the transition from oncology to comfort care. *Journal of clinical nursing*. 2018;27(21-22):4158-4167.
99. Carneiro C, Ellis J, Singh S, Cheung MC. Patient and primary care practitioner confidence in and perceptions of cancer treatment transition and the shared care model of cancer care. *Journal of Oncology Navigation & Survivorship*. 2016;7(8):18-24.
100. Carpenter-Kellett T, Sisler JJ. Moving forward after cancer: Implementation of transition appointments and follow-up care plans in Manitoba. *Journal of Clinical Oncology*. 2016;34(3 SUPPL. 1).
101. Carrillo GM, Carreno S, Lopez R, Gomez O, Cardenas D, Arias M. Looking for control at the end of life through the bond: A grounded theory on the hospital discharge process in palliative care. *Journal of Pain and Symptom Management*. 2018;56(6):e44.
102. Casotto V, Rolfini M, Ferroni E, et al. End-of-life place of care, health care settings, and health care transitions among cancer patients: Impact of an integrated cancer palliative care plan. *Journal of Pain and Symptom Management*. 2017;54(2):167-175.
103. Castel OC. Patients' adherence to oral anticancer treatment: The association with healthcare delivery characteristics at the interface between primary and oncology specialty care. *Dissertation Abstracts International: Section B: The Sciences and Engineering*. 2022;83(5-B):No-Specified.
104. Castro JA, Mak E, Lau J, Zimmermann C. Environmental scan of the information transfer process for admissions to an acute palliative care unit in an academic cancer center (qi433). *Journal of pain and symptom management*. 2022;63(5):903.

105. Castro Telles A, de Souza São Bento PA, Crescêncio Chagas M, Azevedo de Queiroz AB, de Mendonça Bittencourt NCC, Miranda da Silva M. Transition to exclusive palliative care for women with breast cancer. *Revista brasileira de enfermagem*. 2021;74(5):1-8.
106. Ceballos RM, Hohl SD, Molina Y, et al. Oncology provider and african-american breast cancer survivor perceptions of the emotional experience of transitioning to survivorship. *Journal of psychosocial oncology*. 2021;39(1):35-53.
107. Cha L, Tevaarwerk AJ, Smith EM, et al. Reported concerns and acceptance of information or referrals among breast cancer survivors seen for care planning visits: Results from the university of wisconsin carbone cancer center survivorship program. *Journal of cancer education : the official journal of the American Association for Cancer Education*. 2022;37(6):1702-1710.
108. Cha L, Tevaarwerk AJ, Smith EM, et al. Reported concerns and acceptance of information or referrals among survivors with breast cancer seen for survivorship care planning visits: Results from the University Of Wisconsin Carbone Cancer Center (UWCCC) survivorship program. *Cancer research*. 2021;81(4 SUPPL).
109. Chadder J, Zomer S, Lockwood G, et al. Understanding the experiences of cancer patients as they transition from treatment to primary and community care: A pan-Canadian study of over 13,000 cancer survivors. *Journal of Global Oncology*. 2018;4(Supplement 2):119s.
110. Chafee A, Davis D, Rivett R, Wickline M. Preparing patients, caregivers, and their community oncology providers for life after bmt: A comprehensive discharge process. *Biology of Blood and Marrow Transplantation*. 2017;23(3 Supplement 1):S366.
111. Chan HY-L, Chung CK-M, Tam SS-C, Chow RS-K. Community palliative care services on addressing physical and psychosocial needs in people with advanced illness: A prospective cohort study. *BMC palliative care*. 2021;20(1):143.
112. Chao YH, Lee TI, Sheu SJ. A survey of the factors of influence and interventional strategies for breast cancer survivors' transition care across multiple theoretical perspectives. *Hu li za zhi The journal of nursing*. 2018;65(1):83-89.
113. Chaparro-Diaz L, Rojas MZ, Carreño-Moreno SP. Optimising postoperative discharge plans for patients undergoing surgical treatment for gastric cancer: A literature review. *Gastrointestinal Nursing*. 2021;19(1):34-40.
114. Charmillot PA. The transition phase towards palliative care of cancer patients, a source of stress for the caregivers. *Psycho-Oncologie*. 2011;5(2):92-97.
115. Chen H, Johnson M, Boland E, Seymour J, Macleod U. Emergency admissions and subsequent inpatient care through an emergency oncology service at a tertiary cancer centre: Service users' experiences and views. *Supportive Care in Cancer*. 2019;27(2):451-460.
116. Chen Y, Chen Y, Qin T, Fu G, Bai J. Associations of readiness for hospital discharge with symptoms and non-routine utilization of post-discharge services among cancer patients receiving oral chemotherapy at home: A prospective study. *Journal of oncology pharmacy practice : official publication of the International Society of Oncology Pharmacy Practitioners*. 2022:10781552221100720.
117. Cheung W, Neville B, Earle C. Role of cancer survivorship discussions in affecting patient and physician expectations and receipt of follow-up care. *Psycho-Oncology*. 2010;19(SUPPL. 2):S122.
118. Chini C, Balzan L, Sutter M, et al. Role of nurse-discharge manager in an oncology ward: A single centre experience. *Tumori*. 2019;105(6 Supplement):201.
119. Chiou L-J, Chen H-M, Pan L-F, Lee C-C. Holiday ratio of hospitalization and 30-day readmission rates among cancer patients after major surgery. *Cancer medicine*. 2022;11(3):743-752.
120. Chiu M, Mai A, Schapira L, Kim J. Findings from a novel cancer survivorship clinic embedded in primary care: High satisfaction and improved patient self-efficacy. *Journal of general internal medicine*. 2021;36(SUPPL 1):S388-S389.
121. Choi Y. Care coordination and transitions of care. *Medical Clinics of North America*. 2017;101(6):1041-1051.

122. Chou W-YS, Falisi AL, Castro K, et al. Cancer clinical trial providers' perspectives on communicating goals of care: A key informant study. *PEC innovation*. 2022;1:100041.
123. Chow C, Gaertner W, Jensen C, Sklow B, Madoff R, Kwaan M. Does hospital transfer impact outcomes after colorectal surgery? *Diseases of the Colon and Rectum*. 2016;59(5):e67.
124. Chow Z, Osterhaus P, Huang B, et al. Factors contributing to delay in specialist care after colorectal cancer diagnosis in kentucky. *The Journal of surgical research*. 2021;259:420-430.
125. Chowdhry V, Simpson N. Process modeling radiation oncology clinic workflow from therapeutic simulation to treatment: Identifying impending strain and possible treatment delays. *Journal of Clinical Oncology*. 2022;40(28 Supplement):39.
126. Christiansen AH, Lipczak H, Knudsen JL. Attention to cancer patients' safety after primary treatment is needed. *Danish medical journal*. 2015;62(6).
127. Chung C, Haller DM, Pautex S, Sommer J. Oncological patients in primary care: Ruptures and transitions. *Revue Medicale Suisse*. 2018;14(606):976-979.
128. Ciria-Suarez L, Jimenez-Fonseca P, Palacin-Lois M, et al. Breast cancer patient experiences through a journey map: A qualitative study. *PloS one*. 2021;16(9):e0257680.
129. Cloyes KG, Hull W, Davis A. Palliative and end-of-life care for lesbian, gay, bisexual, and transgender (lgbt) cancer patients and their caregivers. *Seminars in oncology nursing*. 2018;34(1):60-71.
130. Cohen AC, Boitano TKL, Page M, Gentry ZL, Straughn JM. Risk factors for readmission among gynecologic oncology patients managed with an enhanced recovery after surgery protocol. *Gynecologic oncology*. 2020;159(Supplement 1):297.
131. Collie K, McCormick J, Waller A, et al. Qualitative evaluation of care plans for Canadian breast and head-and-neck cancer survivors. *Current Oncology*. 2014;21(1):e18-e28.
132. Collins A, Sundararajan V, Burchell J, et al. Transition points for the routine integration of palliative care in patients with advanced cancer. *Journal of pain and symptom management*. 2018;56(2):185-194.
133. Combrink MJW, Maree JE. The transition from palliation with anticancer treatment to palliation without anticancer treatment. *Journal of Hospice & Palliative Nursing*. 2016;18(5):421-428.
134. Connell LC, Othman F, McCaffrey J, Carney D, Marsh B, Kelly CM. The role of intensive care in the changing paradigm of modern cancer care. *Journal of Clinical Oncology*. 2012;30(15 SUPPL. 1).
135. Constone LS, Termer NK, Holub D, et al. An integrative approach to personalized cancer survivorship care at an academic medical center. *Journal of Clinical Oncology*. 2017;35(5 Supplement 1).
136. Cook L, Woods C, Nicholls T, Ooi EH. Delays in time to head and neck cancer treatment: A south australian perspective. *Medicina (Kaunas, Lithuania)*. 2022;58(2).
137. Corcoran S, Licciardi F, Weber E, et al. Improving referrals to survivorship: A patient-driven initiative. *Journal of Clinical Oncology*. 2021;39(28 SUPPL).
138. Cordier M, Mouda F, Regnault D, et al. Conect: Promoting therapeutic education in oral chemotherapy. From training to implementation of a program between primary and secondary care. *European Journal of Oncology Pharmacy*. 2018;1(3 Supplement 1):17.
139. Coschi CH, Bainbridge D, Sussman J. Understanding the attitudes and beliefs of oncologists regarding the transitioning and sharing of survivorship care. *Current oncology (Toronto, Ont)*. 2021;28(6):5452-5465.
140. Cosolo L, Leahey A, Elmi S, Homeward T. Development of a nurse-initiated proactive telephone nursing assessment guideline for new cancer patients. *Canadian oncology nursing journal = Revue canadienne de nursing oncologique*. 2023;33(1):116-121.

141. Costa AASD, Caldeira PC, Sousa AA, et al. Oral and oropharyngeal cancer: Time from first symptoms to treatment initiation and associated factors. *Brazilian oral research*. 2023;37:e054.
142. Coulourides Kogan A, Koons E, Enguidanos S. Investigating the impact of intervention refusal on hospital readmission. *The American journal of managed care*. 2017;23(12):e394-e401.
143. Coutsouvelis J, Corallo CE, Dooley MJ, Foo J, Whitfield A. Implementation of a pharmacist-initiated pharmaceutical handover for oncology and haematology patients being transferred to critical care units. *Support Care Cancer*. 2010;18(7):811-816.
144. Coyle N. A model of continuity of care for cancer patients with chronic pain. *Medical Clinics of North America*. 1987;71(2):259-270.
145. Crighton MH, Coyne BM, Tate J, Swigart V, Happ MB. Transitioning to end-of-life care in the intensive care unit: A case of unifying divergent desires. *Cancer Nursing*. 2008;31(6):478-484.
146. Criticos Y, Chow J, Harris C, Alfred H. Shared care using a web-based care plan tool in breast cancer survivorship. *Asia-Pacific journal of clinical oncology*. 2022;18(Supplement 3):202.
147. Culha I, Gursoy E, Bulut H. Investigating the effect of a structured discharge training program on patient outcomes following gynecologic oncology surgery. *Clinical nursing research*. 2020;29(8):616-626.
148. Curcio KR, Lambe C, Schneider S, Khan K. Evaluation of a cancer survivorship protocol: Transitioning patients to survivors. *Clin J Oncol Nurs*. 2012;16(4):400-406.
149. D'Angelo D, Chiara M, Vellone E, et al. Transitions between care settings after enrolment in a palliative care service in Italy: A retrospective analysis. *International Journal of Palliative Nursing*. 2013;19(3):110-115.
150. Dabholkar S, Malalasekera A, Vinod S, et al. Evaluation of a rapid assessment clinic for lung malignancy. *Respirology*. 2021;26(SUPPL 2):50.
151. Dahlke DV, Yoshikawa A, McAdam M, Malatok S, Gonzales ED. An analysis of health care team communication needs among younger vs older breast cancer survivors: Web-based survey. *JMIR cancer*. 2022;8(1):e31118.
152. Dallaire C, Dallaire M, Juneau L, Hegg-Deloye S. Making a safe transition home after a meningioma resection: The impact of nursing care. *Canadian journal of neuroscience nursing*. 2016;38(1):65-74.
153. Daly RM, Cracchiolo JR, Huang J, et al. Remote symptom monitoring after hospital discharge. *Journal of Clinical Oncology*. 2022;40(16 Supplement 1).
154. Dang S, Patel T, Lao I, et al. Discharge disposition after head and neck reconstruction: Effect on adjuvant therapy and outcomes. *The Laryngoscope*. 2023.
155. Davis JL, Saunders TA, Terrazas E, Rabban JT. A web-based tracking system to facilitate transfer of patient care between residents in a multi-site academic anatomic pathology department: A solution to jcaho and acgme mandates for optimizing patient "handoffs". *Laboratory Investigation*. 2012;92(SUPPL. 1):498A.
156. De la Garza Ramos R, Park C, McCray E, et al. Interhospital transfer status for spinal metastasis patients in the United States is associated with more severe clinical presentations and higher rates of inpatient complications. *Neurosurgical focus*. 2021;50(5):E4.
157. De Vlieghe K, Aertgeerts B, Declercq A, Milisen K, Sermeus W, Moons P. Shifting care from hospital to home: A qualitative study. *Primary Health Care*. 2015;25(9):26-33.
158. Decker KM, Lambert P, Nugent Z, Biswanger N, Samadder J, Singh H. Time trends in the diagnosis of colorectal cancer with obstruction, perforation, and emergency admission after the introduction of population-based organized screening. *JAMA network open*. 2020;3(5):e205741.
159. Delisle M, Wang Y, Fitch MI, Nagaratnam K, Srikanthan A. Variations in emergency service utilization among cancer survivors: Results from the pan-Canadian experiences of cancer patients in transition study survey. *Journal of oncology*. 2023:1-17.

160. Den Bakker CM, Schaafsma FG, Huirne JAF, et al. Cancer survivors' needs during various treatment phases after multimodal treatment for colon cancer - is there a role for ehealth? *BMC Cancer*. 2018;18(1):1207.
161. Deng W, Wang Y, Yang M, Liu X, Yang Z, Jiang W. Racial disparities in time to treatment initiation for stage iv non-small cell lung cancer patients receiving immunotherapy. *International Journal of Radiation Oncology Biology Physics*. 2020;108(3 Supplement):e154.
162. Dennis K, Librach SL, Chow E. Palliative care and oncology: Integration leads to better care. *Oncology (Williston Park, NY)*. 2011;25(13):1271-1275.
163. Deol R, Cheung MC, Del Giudice EM, Boudreau A, Miller D, Singh S. Transition care clinic: Evidence-based survivorship care. *Journal of Clinical Oncology*. 2013;31(31 SUPPL. 1).
164. Deveaux A, Islam J, Akinyemiju T. Overall survival in ovarian cancer patients seeking care at more than one treatment facility. *Cancer Epidemiology Biomarkers and Prevention*. 2022;31(1 SUPPL).
165. Diccio-Bloom B, Cunningham RS. The experience of information sharing among primary care clinicians with cancer survivors and their oncologists. *Journal of cancer survivorship : research and practice*. 2013;7(1):124-130.
166. Dillon EC, Meehan A, Li J, et al. How, when, and why individuals with stage iv cancer seen in an outpatient setting are referred to palliative care: A mixed methods study. *Supportive care in cancer : official journal of the Multinational Association of Supportive Care in Cancer*. 2021;29(2):669-678.
167. Doescher MP, Nagykaldi Z, Zhao YD, Dwyer K. Oncology and primary care provider views on cancer survivorship care: Mind the gap. *Journal of the American Board of Family Medicine : JABFM*. 2022;35(2):329-340.
168. Dong J, Esham KS, Boehm L, et al. Timeliness of treatment initiation in newly diagnosed patients with breast cancer. *Clinical breast cancer*. 2020;20(1):e27-e35.
169. Donze J, Lipsitz SR, Schnipper JL. Risk factors for potentially avoidable readmission in cancer patients. *Journal of General Internal Medicine*. 2014;29(SUPPL. 1):S203.
170. Donze JD, Lipsitz S, Schnipper JL. Risk factors and patterns of potentially avoidable readmission in patients with cancer. *Journal of oncology practice*. 2017;13(1):e68-e76.
171. Duangchan C, Steffen A, Matthews AK. Discharge planning practice for patients with colorectal cancer in thailand. *Nursing Practice Today*. 2022;9(4):293-302.
172. Duffy AP, Bembem NM, Li J, Trovato J. Facilitating home hospice transitions of care in oncology: Evaluation of clinical pharmacists' interventions, hospice program satisfaction, and patient representation rates. *American Journal of Hospice & Palliative Medicine*. 2018;35(9):1181-1187.
173. Duggleby W, Berry P. Transitions and shifting goals of care for palliative patients and their families. *Clinical journal of oncology nursing*. 2005;9(4):425-428.
174. Duggleby WD, Penz K, Leipert BD, Wilson DM, Goodridge D, Williams A. 'I am part of the community but...' The changing context of rural living for persons with advanced cancer and their families. *Rural and remote health*. 2011;11(3):1733.
175. Duineveld LAM, Wieldraaijer T, van Asselt KM, et al. Improving care after colon cancer treatment in the netherlands, personalised care to enhance quality of life (i care study): Study protocol for a randomised controlled trial. *Trials*. 2015;16(1):284.
176. Dulal S, Paudel BD, Neupane PC, et al. Time delay barriers in diagnosis and treatment of gastrointestinal cancer in nepal. *Journal of Clinical Oncology*. 2020;38(15).
177. Dumont I, Dumont S, Turgeon J. Continuity of care for advanced cancer patients. *Journal of Palliative Care*. 2005;21(1):49-56.
178. Durieux BN, Berrier A, Catzen HZ, et al. "I think that she would have wanted. . .": Qualitative interviews with bereaved caregivers reveal complexity in measuring goal-concordant care at the end of life. *Palliative medicine*. 2022;36(4):742-750.
179. Eaglehouse YL, Georg MW, Shriver CD, Zhu K. Racial comparisons in timeliness of colon cancer treatment in an equal-access health system. *Journal of the National Cancer Institute*. 2020;112(4):410-417.

180. Eaglehouse YL, Shao S, Chan W, et al. The continuum of breast cancer care and outcomes in the u.S. Military health system: An analysis by benefit type and care source. *Journal of cancer survivorship : research and practice*. 2018;12(3):407-416.
181. Easley J, Miedema B, Carroll JC, et al. Coordination of cancer care between family physicians and cancer specialists: Importance of communication. *Canadian family physician Medecin de famille canadien*. 2016;62(10):e608-e615.
182. Easley J, Miedema B, Carroll JC, O'Brien MA, Manca DP, Grunfeld E. Patients' experiences with continuity of cancer care in Canada: Results from the canimpact study. *Canadian Family Physician*. 2016;62(10):821-827.
183. Economos G, Tholly F, Rhondali W, et al. Nursing home hospital transfers in the terminally ill: Night shift nurses matter! *BMJ supportive & palliative care*. 2019((Tholly Agence Regionale de Sante Auvergne-Rhone-Alpes, Lyon, France).
184. Economou D, Reb A. Communication concerns when transitioning to cancer survivorship care. *Seminars in oncology nursing*. 2017;33(5):526-535.
185. Edwards G, Gamboa AC, Abdel-misih S, et al. What's the magic number? Impact of time to initiation of treatment for rectal cancer. *Diseases of the colon and rectum*. 2020;63(6):e152.
186. Ehab J, Powers B, Kim R, et al. Integrating a disease-focused tumor board as a delivery-of-care model to expedite treatment initiation for patients with liver malignancies. *Annals of surgical oncology*. 2022;29(4):2371-2380.
187. Ehresman J, Pennington Z, Feghali J, et al. Predicting nonroutine discharge in patients undergoing surgery for vertebral column tumors. *Journal of Neurosurgery: Spine*. 2021;34(3):364-373.
188. Ekstedt M, Borosund E, Svenningsen IK, Ruland CM. Reducing errors through a web-based self-management support system. *Studies in health technology and informatics*. 2014;201((Ruland) Center for Shared Decision Making, Oslo University Hospital Oslo, Norway):328-334.
189. El Amrani M, Lenne X, Clement G, et al. Referring patients to expert centers after pancreatectomy is too late to improve outcome. Inter-hospital transfer analysis in nationwide study of 19,938 patients. *Annals of surgery*. 2020;272(5):723-730.
190. El Hachem P, Pasniciuc S, Khurana S, et al. Characteristics of patients with cancer readmitted within 30 days to an acute palliative care unit. *Journal of palliative care*. 2023;38(2):200-206.
191. Elias ML, John AM, Maddukuri S, Schwartz RA, Lambert WC. Treatment delay in melanoma: A risk factor analysis of an impending crisis. *Cutis*. 2021;107(4):E19-E26.
192. Elkins W, Mbah O, Benson JT, et al. Impact of racial differences in financialburden on time to treatment. *Cancer Epidemiology Biomarkers and Prevention*. 2020;29(6 SUPPL 2).
193. Emerson MA, Golightly YM, Aiello AE, et al. Breast cancer treatment delays by socioeconomic and health care access latent classes in black and white women. *Cancer*. 2020;126(22):4957-4966.
194. Eng L, Verma AA, Shin S, et al. Comparing characteristics and outcomes of cancer to non-cancer patients admitted to general internal medicine (gim). *Journal of Clinical Oncology*. 2020;38(29).
195. Evans WG, Tulskey JA, Back AL, Arnold RM. Communication at times of transitions: How to help patients cope with loss and re-define hope. *Cancer Journal*. 2006;12(5):417-424.
196. Ezendam NPM, Nicolaije KAH, Kruitwagen RFPM, et al. Survivorship care plans to inform the primary care physician: Results from the rogy care pragmatic cluster randomized controlled trial. *Journal of Cancer Survivorship*. 2014;8(4):595-602.



197. Fadelu TA, Erfani P, Lormil J, et al. Gaps in completion and timeliness of breast surgery and adjuvant therapy: A retrospective cohort of haitian patients with nonmetastatic breast cancer. *Breast cancer research and treatment*. 2022;193(3):625-635.
198. Fane LS, Wei A, Tripathi R, Bordeaux JS. 1290 disparities in time to treatment for asian melanoma patients. *Journal of Investigative Dermatology*. 2023;143(5 Supplement):S221.
199. Fane LS, Wei AH, Tripathi R, Bordeaux JS. Asian american and pacific islander patients with melanoma have increased odds of treatment delays: A cross-sectional study. *Journal of the American Academy of Dermatology*. 2023.
200. Fareed MM, Ishtiaq R, Galloway TJ. Testing the timing: Time factor in radiation treatment for head and neck cancers. *Current Treatment Options in Oncology*. 2018;19(4):17.
201. Faria R, Law S, Hijal T, et al. Looking forward: Co-designing a cancer survivorship program for patients completing active treatment. *Journal of Medical Imaging and Radiation Sciences*. 2017;48((Hijal, Zidulka) Department of Oncology, McGill University, Canada):S1.
202. Faul LA, Rivers B, Shibata D, et al. Survivorship care planning in colorectal cancer: Feedback from survivors & providers. *Journal of Psychosocial Oncology*. 2012;30(2):198-216.
203. Felder TM, Estrada RD, Quinn JC, Phelps KW, Parker PD, Heiney SP. Expectations and reality: Perceptions of support among african american breast cancer survivors. *Ethnicity & health*. 2019;24(7):737-753.
204. Festa K, Hirsch AE, Cassidy MR, et al. Breast cancer treatment delays at an urban safety net hospital among women experiencing homelessness. *Journal of community health*. 2019((Sullivan) Harvard T.H. Chan School of Public Health, MA, Boston, United States).
205. Fitch MI, Nicoll I, Lockwood G. Cancer survivor's perspectives on the major challenge in the transition to survivorship. *Patient education and counseling*. 2020;103(11):2361-2367.
206. Fitch MI, Nicoll I, Lockwood G, Stroschein FJ, Newton L. Main challenges in survivorship transitions: Perspectives of older adults with cancer. *Journal of geriatric oncology*. 2021;12(4):632-640.
207. Fitch MI. Transition to survivorship: Can there be improvement? *Current opinion in supportive and palliative care*. 2018;12(1):74-79.
208. Fong AJ, Evens AM, Bandera EV, et al. Survivorship transition care experiences and preparedness for survivorship among a diverse population of cancer survivors in new jersey. *European journal of cancer care*. 2022;31(2):e13553.
209. Forsythe LP, Parry C, Alfano CM, et al. Gaps in survivorship care plan delivery and potential benefits to survivorship care. *Journal of Clinical Oncology*. 2013;31(15 SUPPL. 1).
210. Forsythe LP, Parry C, Alfano CM, et al. Use of survivorship care plans in the united states: Associations with survivorship care. *Journal of the National Cancer Institute*. 2013;105(20):1579-1587.
211. Fox J, Windsor C, Connell S, Yates P. The positioning of palliative care in acute care: A multiperspective qualitative study in the context of metastatic melanoma. *Palliative & supportive care*. 2016;14(3):259-268.
212. Franco BB, Dharmakulaseelan L, McAndrew A, Bae S, Cheung MC, Singh S. The experiences of cancer survivors while transitioning from tertiary to primary care. *Current Oncology*. 2016;23(6):378-385.
213. Franzoi MA, Degousee L, Martin E, et al. Implementing a proactive care pathway to empower and support survivors of breast cancer. *JCO oncology practice*. 2023;19(6):353-361.

214. Freymond M, O'Connor E. Patterns of utilization and time-course of events for cancer-related emergency department visits following same-day outpatient oncology appointments. *Canadian Journal of Emergency Medicine*. 2020;22(Supplement 1):S100.
215. Frosch ZAK, Illenberger N, Mitra N, et al. Trends in patient volume by hospital type and the association of these trends with time to cancer treatment initiation. *JAMA network open*. 2021;4(7):e2115675.
216. Fu J, Gupta E. Return to the primary acute care service of glioblastoma multiforme acute inpatient rehabilitation patients. *Archives of physical medicine and rehabilitation*. 2021;102(10):e48.
217. Fu JB, Gupta E, Morishita S, et al. Frequency and reasons for unplanned transfer to the primary acute care service of inpatient rehabilitation glioblastoma multiforme patients. *Supportive Care in Cancer*. 2023;31(2):122.
218. Fu JB, Lee J, Smith DW, Bruera E. Frequency and reasons for return to acute care in patients with leukemia undergoing inpatient rehabilitation: A preliminary report. *American journal of physical medicine & rehabilitation / Association of Academic Physiatrists*. 2013;92(3):215-222.
219. Fuentes AC, Lambird JE, George TJ, Markham MJ. Cancer survivor's history and physical. *Southern Medical Journal*. 2017;110(1):37-44.
220. Funk GF, Pasker KL, Bayon R, Pagedar NA, Karnell LH. Head-and-neck cancer survivorship clinic satisfaction study survivorship. *International Journal of Radiation Oncology Biology Physics*. 2014;88(2):528.
221. Fwelo P, Nwosu KOS, Adekunle TE, et al. Racial/ethnic and socioeconomic differences in breast cancer surgery performed and delayed treatment: Mediating impact on mortality. *Breast cancer research and treatment*. 2023;199(3):511-531.
222. Gade K, Dunn SCA, Ormond E, et al. Patient reported outcomes and healthcare utilization of upmc breast cancer survivorship clinicpatients. *Cancer research*. 2021;81(4 SUPPL).
223. Gadzinski AJ, Dimick JB, Ye Z, Zeller JL, Miller DC. Transfer rates and use of post-acute care after surgery at critical access vs non-critical access hospitals. *JAMA Surgery*. 2014;149(7):671-677.
224. Galati JS, Kranick J, Colella D, Kwon SC, Foster V, Liang PS. Predictors of time to colonoscopy after positive fecal immunochemical test in a large urban federally qualified health center network. *Gastroenterology*. 2021;160(6 Supplement):S-201.
225. Gamblin V, Prod'homme C, Lecoivre A, et al. Home hospitalization for palliative cancer care: Factors associated with unplanned hospital admissions and death in hospital. *BMC palliative care*. 2021;20(1):24.
226. Gandhi S, Lott ACK, Bryant S, et al. A novel pa-led urgent care model for medical oncology patients at a large academic cancer center. *Journal of Clinical Oncology*. 2022;40(28 Supplement):37.
227. Gao J, Wang X, Zhang L, et al. Prevalence and predictors of psychological distress among patients with thyroid cancer during transitional period in china: A cross-sectional study. *Supportive care in cancer : official journal of the Multinational Association of Supportive Care in Cancer*. 2022;30(10):7903-7911.
228. Garg A, Iyer H, Jindal V, et al. Evaluation of delays during diagnosis and management of lung cancer in india: A prospective observational study. *European journal of cancer care*. 2022;31(5):e13621.
229. Garnett D, Hardy L, Fitzgerald E, Fisher T, Graham L, Overcash J. Nurse case manager: Measurement of care coordination activities and quality and resource use outcomes when caring for the complex patient with hematologic cancer. *Clinical journal of oncology nursing*. 2020;24(1):65-74.
230. Gast KC, Allen SV, Ruddy KJ, Haddad TC. Novel approaches to support breast cancer survivorship care models. *Breast*. 2017;36((Ruddy, Haddad) Mayo Clinic, Department of Oncology, Division of Medical Oncology, United States):1-13.

231. Gilmore KR, Hutcheson KA, Chapman PH, et al. Symptom profile of head and neck patients initiating care in a survivorship clinic. *Journal of Clinical Oncology*. 2022;40(16 Supplement 1).
232. Gochett CG. Psychological well-being among breast cancer survivors: Factors that influence transition from primary treatment to early survivorship. *Dissertation Abstracts International: Section B: The Sciences and Engineering*. 2016;76(12-B(E)):No-Specified.
233. Goel AN, Lee JT, Wang MB, Suh JD. Treatment delays in surgically managed sinonasal cancer and association with survival. *The Laryngoscope*. 2020;130(1):2-11.
234. Goel AN, Frangos M, Raghavan G, et al. Survival impact of treatment delays in surgically managed oropharyngeal cancer and the role of human papillomavirus status. *Head and Neck*. 2019;41(6):1756-1769.
235. Goelz T, Wuensch A, Stubenrauch S, et al. Specific training program improves oncologists' palliative care communication skills in a randomized controlled trial. *Journal of clinical oncology : official journal of the American Society of Clinical Oncology*. 2011;29(25):3402-3407.
236. Goldenberg BA, Carpenter-Kellett T, Gingerich JR, Nugent Z, Sisler JJ. Moving forward after cancer: Successful implementation of a colorectal cancer patient-centered transitions program. *Journal of cancer survivorship : research and practice*. 2020;14(1):4-8.
237. Goldenberg BA, Carpenter-Kellett T, Gingerich JR, Nugent Z, Sisler JJ. Moving forward after cancer: Successful implementation of a colorectal cancer patient-centered transitions program. *Journal of cancer survivorship : research and practice*. 2019((Sisler) Department of Family Medicine, University of Manitoba, Winnipeg, Canada).
238. Gondhowiardjo S, Hartanto S, Wirawan S, et al. Treatment delay of cancer patients in indonesia: A reflection from a national referral hospital. *Medical Journal of Indonesia*. 2021;30(2):129-137.
239. González MG, Kelly KN, Dozier AM, et al. Patient perspectives on transitions of surgical care: Examining the complexities and interdependencies of care. *Qualitative Health Research*. 2017;27(12):1856-1869.
240. Gordon GH. Care not cure: Dialogues at the transition. *Patient Education and Counseling*. 2003;50(1):95-98.
241. Gorgens U, Usher C, Higgins K. P13.03 the role of nurse practitioners within thoracic radiation oncology and the benefit to patients, physicians and the healthcare system. *Journal of Thoracic Oncology*. 2021;16(3 Supplement):S327.
242. Gott M, Gardiner C, Ryan T, Parker C, Noble B, Ingleton C. Prevalence and predictors of transition to a palliative care approach among hospital inpatients in england. *Journal of Palliative Care*. 2013;29(3):147-153.
243. Govalan R, Luu M, Lauzon M, et al. Therapeutic underuse and delay in hepatocellular carcinoma: Prevalence, associated factors, and clinical impact. *Hepatology communications*. 2022;6(1):223-236.
244. Graboyes EM, Halbert CH, Li H, et al. Barriers to the delivery of timely, guideline-adherent adjuvant therapy among patients with head and neck cancer. *JCO oncology practice*. 2020;16(12):e1417-e1432.
245. Graboyes EM, Sterba KR, Li H, et al. Development and evaluation of a navigation-based, multilevel intervention to improve the delivery of timely, guideline-adherent adjuvant therapy for patients with head and neck cancer. *JCO oncology practice*. 2021;17(10):e1512-e1523.
246. Grainger MN, Hegarty S, Schofield P, White V, Jefford M. Discussing the transition to palliative care: Evaluation of a brief communication skills training program for oncology clinicians. *Palliative & supportive care*. 2010;8(4):441-447.
247. Granda-Cameron C, Behta M, Hovinga M, Rundio A, Mintzer D. Risk factors associated with unplanned hospital readmissions in adults with cancer. *Oncology nursing forum*. 2015;42(3):E257-E268.

248. Grant M, De Rossi S, Sussman J. Supporting models to transition breast cancer survivors to primary care: Formative evaluation of a cancer care ontario initiative. *Journal of Oncology Practice*. 2015;11(3):e288-e295.
249. Grass F, Behm KT, Duchalais E, et al. Impact of delay to surgery on survival in stage i-iii colon cancer. *European journal of surgical oncology : the journal of the European Society of Surgical Oncology and the British Association of Surgical Oncology*. 2020;46(3):455-461.
250. Grass F, Hübner M, Crippa J, Lovely JK, Huebner M, Larson DW. Temporal patterns of hospital readmissions according to disease category for patients after elective colorectal surgery. *Journal of evaluation in clinical practice*. 2021;27(2):218-222.
251. Grassi L. Communicating anticancer treatment cessation and transition to palliative care: The need for a comprehensive and culturally relevant, person-centered approach. *Cancer*. 2015;121(23):4104-4107.
252. Grewal K, Krzyzanowska MK, McLeod S, Borgundvaag B, Atzema CL. Outcomes after emergency department use in patients with cancer receiving chemotherapy in ontario, Canada: A population-based cohort study. *CMAJ open*. 2020;8(3):E496-E505.
253. Griffiths P, Simon M, Richardson A, Corner J. Is a larger specialist nurse workforce in cancer care associated with better patient experience? Cross-sectional study. *Journal of health services research & policy*. 2013;18(1 Supplement):39-46.
254. Grunfeld E, Mant D, Vessey MP, Fitzpatrick R. Specialist and general practice views on routine follow-up of breast cancer patients in general practice. *Family Practice*. 1995;12(1):60-65.
255. Grunvald MW, Underhill JM, Aquina CT, Bhama AR, Hayden DM, Becerra A. Mediating factors between patient race and time to colorectal cancer treatment. *Diseases of the colon and rectum*. 2021;64(5):4-5.
256. Guassora AD, Jarlbaek L, Thorsen T. Preparing general practitioners to receive cancer patients following treatment in secondary care: A qualitative study. *BMC health services research*. 2015;15((Thorsen) The Research Unit and Section of General Practice, Department of Public Health, University of Copenhagen, 5, Oster Farimagsgade, Postbox 2099, , 1014, Copenhagen K, Denmark):202.
257. Gupta M, Townsley CA, Kucharski E, et al. Transition of follow-up care to primary care physicians (pcps) of breast cancer (bc) survivors: Barriers and patient satisfaction. *Journal of Clinical Oncology*. 2015;33(15 SUPPL. 1).
258. Gusani NJ, Schubart JR, Wise J, et al. Cancer survivorship: A new challenge for surgical and medical oncologists. *Journal of General Internal Medicine*. 2009;24(Suppl 2):S456-S458.
259. Guven DC, Ceylan F, Cakir IY, et al. Evaluation of early unplanned readmissions and predisposing factors in an oncology clinic. *Annals of Oncology*. 2020;31(Supplement 4):S932.
260. Gysels M, Richardson A, Higginson IJ. Does the patient-held record improve continuity and related outcomes in cancer care: A systematic review. *Health Expectations: An International Journal of Public Participation in Health Care & Health Policy*. 2007;10(1):75-91.
261. Hackett F, Dowling M. Lymphoma survivors' experiences at the end of treatment. *Journal of clinical nursing*. 2019;28(3-4):400-409.
262. Hagberg O, Lazarevic VL, Antunovic P, et al. Impact of treatment delay in acute myeloid leukemia revisited. *Blood advances*. 2021;5(3):787-790.
263. Halling CMB, Wolf RT, Sjogren P, et al. Cost-effectiveness analysis of systematic fast-track transition from oncological treatment to specialised palliative care at home for patients and their caregivers: The domus trial. *BMC palliative care*. 2020;19(1):142.
264. Hamlish T, Liu L, Zhang Z, et al. Care coordination for breast cancer survivors in urban underserved communities: Will treatment summaries and survivorship care plans be enough? *Journal of racial and ethnic health disparities*. 2020;7(3):577-583.

265. Han JS, Yuan E, Bonney PA, et al. Interhospital transfer of patients with malignant brain tumors undergoing resection is associated with routine discharge. *Clinical neurology and neurosurgery*. 2022;221:107372.
266. Han KT, Chang J, Choi DW, et al. Association of institutional transition of cancer care with mortality in elderly patients with lung cancer: A retrospective cohort study using national claim data. *BMC cancer*. 2022;22(1):452.
267. Han KT, Kim W, Song A, Ju YJ, Choi DW, Kim S. Is time-to-treatment associated with higher mortality in korean elderly lung cancer patients? *Health Policy*. 2021;125(8):1047-1053.
268. Hancock J, Wines-Larch C. Pre- and post-treatment clinic: Providing psychosocial care from diagnosis to survivorship. *Oncology Issues*. 2022;37(6):42-46.
269. Hanna TP, King WD, Thibodeau S, et al. Mortality due to cancer treatment delay: Systematic review and meta-analysis. *BMJ (Clinical research ed)*. 2020;371:m4087.
270. Hanratty B, Holmes L, Lowson E, et al. Older adults' experiences of transitions between care settings at the end of life in england: A qualitative interview study. *Journal of Pain and Symptom Management*. 2012;44(1):74-83.
271. Harary M, Bommakanti KK, Nakhla MN, et al. Audit of postoperative readmissions and patient messages following endoscopic transnasal transsphenoidal surgery. *Journal of neurological surgery Part B, Skull base*. 2022;83(6):611-617.
272. Harrison SE, Watson EK, Ward AM, et al. Cancer survivors' experiences of discharge from hospital follow-up. *European Journal of Cancer Care*. 2012;21(3):390-397.
273. Hasegawa T, Yamagishi A, Sugishita A, Akechi T, Kubota Y, Shimoyama S. Integrating home palliative care in oncology: A qualitative study to identify barriers and facilitators. *Supportive care in cancer : official journal of the Multinational Association of Supportive Care in Cancer*. 2022;30(6):5211-5219.
274. Hashimoto Y, Hayashi A, Tonegawa T, Teng L, Igarashi A. Cost-saving prediction model of transfer to palliative care for terminal cancer patients in a japanese general hospital. *Journal of market access & health policy*. 2022;10(1):2057651.
275. Hatcher I, Harms L, Walker B, et al. Rural palliative care transitions from home to hospital: Carers' experiences. *The Australian Journal of Rural Health*. 2014;22(4):160-164.
276. Hausner D, Kevork N, Le LW, Zimmermann C. Predictors of discharge disposition on an acute palliative care unit. *Supportive Care in Cancer*. 2017;25(2 Supplement 1):S192.
277. Hayes L, Adams J, McCallum I, et al. Age-related and socioeconomic inequalities in timeliness of referral and start of treatment in colorectal cancer: A population-based analysis. *Journal of epidemiology and community health*. 2021;75(1):1-9.
278. He Y, Qiu H, Zhu W. A feasibility analysis of implementing transitional care for malignant lymphoma patients undergoing chemotherapy. *International journal of clinical and experimental medicine*. 2020;13(10):7605-7613.
279. Hebert J, Fillion L. Development and validation of an individualized survivorship care plan (iscp) for women with endometrial cancer during the transition of the end of active treatment to the cancer survivorship. *Canadian oncology nursing journal = Revue canadienne de nursing oncologique*. 2017;27(1):33-42.
280. Hebert J, Fillion L. Assessment of the feasibility and acceptability, and pre-test of the utility of an individualized survivorship care plan (iscp) for women with endometrial cancers during the transition of the end of active treatment to cancer survivorship. *Canadian oncology nursing journal = Revue canadienne de nursing oncologique*. 2017;27(2):153-163.
281. Heeg E, Schreuder K, Spronk PER, et al. Hospital transfer after a breast cancer diagnosis: A population-based study in the netherlands of the extent, predictive characteristics and its impact on time to treatment. *European Journal of Surgical Oncology*. 2019;45(4):560-566.

282. Heffner C, Dillaman M, Hill J. Pharmacist-driven medication reconciliation reduces oral oncolytic medication errors during transitions of care. *American journal of health-system pharmacy : AJHP : official journal of the American Society of Health-System Pharmacists*. 2020;77(Supplement\_4):S100-S104.
283. Heid CA, Houry MK, Thornton MA, Geoffrion TR, De Hoyos AL. Risk factors for nonhome discharge after esophagectomy for neoplastic disease. *The Annals of thoracic surgery*. 2021;111(4):1118-1124.
284. Heins M, Schellevis F, Schotman M, et al. Feasibility and acceptability of follow-up for prostate cancer in primary care: A pilot study. *BJGP Open*. 2018;2(4):1-9.
285. Herzog L, Howell D, Moura S, et al. Quality care and patient involvement in their care: Preferences for transitioning cancer follow-up care to the community. *Journal of Clinical Oncology*. 2014;32(30 SUPPL. 1).
286. Heung Y, Azhar A, Ali Akbar Naqvi SM, et al. Frequency and characteristics of first-time palliative care referrals during the last day of life. *Journal of pain and symptom management*. 2021;61(2):358-363.
287. Hewage SA, Samaraweera S, Joseph N, Kularatna S, Gunawardena N. Presentation, diagnosis and treatment delays in breast cancer care and their associations in sri lanka, a low-resourced country. *Clinical oncology (Royal College of Radiologists (Great Britain))*. 2022;34(9):598-607.
288. Higashibata T, Iwata N, Kazama I, et al. Association of a home-based nursing service during chemotherapy with the transfer to home care immediately after the last chemotherapy treatment in patients with advanced cancer. *Japanese journal of clinical oncology*. 2022;52(9):1039-1044.
289. Hill KK, Hacker ED. Helping patients with cancer prepare for hospice. *Clinical Journal of Oncology Nursing*. 2010;14(2):180-188.
290. Hoang CM, Davids JS, Maykel JA, Flahive JM, Sturrock PR, Alavi K. Not all discharge settings are created equal: Thirty-day readmission risk after elective colorectal surgery. *Diseases of the colon and rectum*. 2020;63(9):1302-1309.
291. Hoffman AJ, Brintnall RA, von Eye A, Cooper J, Brown JK. The voice of postsurgical lung cancer patients regarding supportive care needs. *Lung Cancer: Targets and Therapy*. 2014;5((Brown) School of Nursing, State University of New York at Buffalo, Buffalo, NY, United States):21-31.
292. Holland CM, Lovasik BP, Howard BM, McClure EW, Samuels OB, Barrow DL. Interhospital transfer of neurosurgical patients: Implications of timing on hospital course and clinical outcomes. *Clinical Neurosurgery*. 2017;81(3):450-457.
293. Holmang S, Johansson SL. Impact of diagnostic and treatment delay on survival in patients with renal pelvic and ureteral cancer. *Scandinavian Journal of Urology and Nephrology*. 2006;40(6):479-484.
294. Hopkins B, Gold M, Wei A, Grigoriadis G. Improving the transition to palliative care for patients with acute leukemia: A coordinated care approach. *Cancer Nursing*. 2017;40(3):E17-E23.
295. Hopstaken J, van Dalen D, van der Kolk M, et al. Continuity of care experienced by patients in a multi-institutional pancreatic care network: A pilot study. *HPB*. 2021;23(Supplement 3):S975-S976.
296. Hopstaken JS, Vissers PA, Quispel R, et al. Impact of multicenter diagnostic workup on time-to-diagnosis and time-to-treatment in patients with pancreatic ductal adenocarcinoma: A nationwide analysis. *HPB*. 2022;24(Supplement 1):S304-S305.
297. Hoshina M. Study of collaboration methods between nurses and medical social workers during facility transfer of end-of-life cancer patients. *Asia-Pacific journal of oncology nursing*. 2015;2(4):264-270.
298. Howie C, MacLeod M, Keenan M, Steel K. Using palliative performance scale (pps) and phase of illness tool (poi) to facilitate improvement in communication of palliative care needs across health and social care. *BMJ Supportive and Palliative Care*. 2019;9(Supplement 1):A54-A55.
299. Hsueh MT-F, Dorcy KS. Improving transitions of care with an advanced practice nurse: A pilot study. *Clinical Journal of Oncology Nursing*. 2016;20(3):240-243.

300. Huang M, Alam R, Gabrielson A, et al. Using competing risk of mortality to inform the transition from prostate cancer active surveillance to watchful waiting. *Journal of Urology*. 2021;206(SUPPL 3):e289.
301. Huang R-Y, Lee T-T, Lin Y-H, Liu C-Y, Wu H-C, Huang S-H. Factors related to family caregivers' readiness for the hospital discharge of advanced cancer patients. *International journal of environmental research and public health*. 2022;19(13).
302. Huenerberg KJ, Anderson BM, Tevaarwerk AJ, et al. Integrating survivorship care planning in radiation oncology workflow. *Journal of Community and Supportive Oncology*. 2018;16(2):e66-e71.
303. Hughes LC, Hodgson NA, Muller P, Robinson LA, McCorkle R. Information needs of elderly postsurgical cancer patients during the transition from hospital to home. *Journal of Nursing Scholarship*. 2000;32(1):25-30.
304. Hui D, Elsayem A, Palla S, et al. Discharge outcomes and survival of patients with advanced cancer admitted to an acute palliative care unit at a comprehensive cancer center. *Journal of palliative medicine*. 2010;13(1):49-57.
305. Hulbert-Williams NJ, Norwood SF, Gillanders D, et al. Brief engagement and acceptance coaching for hospice settings (the beaches study): Results from a phase i study of acceptability and initial effectiveness in people with non-curative cancer. *BMC palliative care*. 2021;20(1):96.
306. Hunter AJ, Hendrikse AS. Estimation of the effects of radiotherapy treatment delays on tumour responses: A review. *SA Journal of Oncology*. 2020;4:v4i091.
307. Hunter S, De Rossi S, Gollnow A, et al. Identifying critical data elements for a provincial transition plan from a primary care perspective. *Journal of Clinical Oncology*. 2017;35(5 Supplement 1).
308. Hussain T, Chang HY, Luu NP, Pollack CE. The value of continuity between primary care and surgical care in colon cancer. *PLoS ONE*. 2016;11(5):e0155789.
309. Hutchinson T, Hoffe S, Saeed S, Pflanz SA, Fleming JB, Pabbathi S. Gastrointestinal disease-specific survivorship care: A new personalized model integrating onco-wellness. *Cancer control : journal of the Moffitt Cancer Center*. 2021;28:10732748211006081.
310. Hutten R, Weil CR, Gaffney DK, et al. Racial and ethnic health disparities in delay to initiation of intensity-modulated radiotherapy. *International Journal of Radiation Oncology Biology Physics*. 2021;111(3 Supplement):e323.
311. Huynh L, Nolen A, Bonares M, et al. Reducing emergency department use for ambulatory oncology patients requiring palliative care: A quality improvement initiative. *Palliative medicine*. 2022;36(1 SUPPL):19.
312. Hwang IY, Han Y, Kim MS, et al. Pp069 preferred versus actual place of care and factors associated with home discharge among korean patients with terminal cancer. *ESMO open*. 2022;7(6 Supplement 1):100662.
313. Hwang S, Urbanowicz R, Lynch S, et al. Toward predicting 30-day readmission among oncology patients: Identifying timely and actionable risk factors. *JCO clinical cancer informatics*. 2023;7:e2200097.
314. Iachina M, Jakobsen E, Fallesen AK, Green A. Transfer between hospitals as a predictor of delay in diagnosis and treatment of patients with non-small cell lung cancer - a register based cohort-study. *BMC health services research*. 2017;17(1):267.
315. Ikeguchi R, Nankaku M, Yamawaki R, et al. Immediate family support is important to discharge home for cancer patient with bone metastasis after rehabilitation: A retrospective study. *Medicine*. 2021;100(37):e27273.
316. Im JH, Chow R, Novosel M, et al. Association of palliative care and hospital outcomes among solid tumour oncology inpatients. *BMJ supportive & palliative care*. 2023.
317. Indoe J, Lane S, Davies K, Rogers SN. Pilot of the patient concerns inventory - ward discharge in patients following major reconstructive surgery for head and neck cancer. *The British journal of oral & maxillofacial surgery*. 2021;59(4):425-432.

318. Ishimoto H, Ikeda T, Kadooka Y. Factors related to satisfaction of cancer patients with transfer arrangements made by university hospitals at the end-of-life in japan: A cross-sectional questionnaire survey of bereaved family members. *Supportive care in cancer : official journal of the Multinational Association of Supportive Care in Cancer*. 2021;29(6):3091-3101.
319. Itamura K, Kokot N, Sinha U, Swanson M. Association of insurance type with time course of care in head and neck cancer management. *The Laryngoscope*. 2020;130(11):E587-E592.
320. Jackson B, Wheeler S, Yanguela J, et al. Impacts of treatment delay on breast cancer mortality and benefit of timely care in black and non-black women. *Cancer research*. 2023;83(5 Supplement).
321. Jackson ML. Transitional care: Methods and processes for transitioning older adults with cancer in a postacute setting. *Clinical journal of oncology nursing*. 2018;22(6):37-41.
322. Jain B, Yamoah K, Lathan CS, et al. Racial disparities in treatment delay among younger men with prostate cancer. *Prostate cancer and prostatic diseases*. 2022;25(3):590-592.
323. Janmohamed N, Segal P, Corrado AM, et al. Endocrinologist-perceived factors affecting the transition of thyroid cancer patients from specialist to primary care postcancer treatment in ontario, Canada. *Thyroid : official journal of the American Thyroid Association*. 2021;31(6):895-901.
324. Jayadevappa R, Guzzo T, Vapiwala N, Malkowicz SB, Gallo JJ, Chhatre S. Continuity of care and advanced prostate cancer. *Cancer medicine*. 2023;12(10):11795-11805.
325. Jeon S, Schulman-Green D, McCorkle R, Dixon JK. Four approaches for determining composite scores for the measurement of transition in cancer scale. *Nursing research*. 2019;68(1):57-64.
326. Johnston D. Current state of care transitions and cancer survivorship. *Journal of Oncology Navigation & Survivorship*. 2013;4(4):11-20.
327. Jones JM, Ferguson S, Edwards E, Walton T, McCurdy N, Howell D. Experiences of care delivery: Endometrial cancer survivors at end of treatment. *Gynecologic oncology*. 2012;124(3):458-464.
328. Jongman E, Qureshi I, Cain L, Khakwani M. A clinical audit of discharge plans for haemato-oncology inpatients at queen elizabeth hospital, birmingham; implementing the safe discharge guideline. *British journal of haematology*. 2021;193(SUPPL 1):87.
329. Joo SC, Navidian A, Sharifi S. Evaluating the effectiveness of planned discharge program in the quality of life of gastrointestinal cancer patients undergoing chemotherapy: A clinical trial study. *Medical-Surgical Nursing Journal*. 2020;9(1):1-9.
330. Juarez G, Mayorga L, Hurria A, Terrell B. Survivorship education for latina breast cancer survivors: Empowering survivors through education. *Psicooncologia*. 2013;10(1):57-68.
331. Jung EH, Lee SW, Kim YJ, et al. Clinical outcomes of operating an acute palliative care unit at a comprehensive cancer center. *JCO oncology practice*. 2022;18(10):e1661-e1671.
332. Kamat S, Chawla S, Rajendram P, Pastores SM, Kostecky N, Halpern NA. An analysis of patients transferred to a tertiary oncological intensive care unit for defined procedures. *American journal of critical care : an official publication, American Association of Critical-Care Nurses*. 2015;24(3):241-247.
333. Kamath P, Taub M, Carranco S, et al. Factors influencing treatment delays in a safety net hospital: Teachable moments? *Gynecologic oncology*. 2021;162(Supplement 1):S160.
334. Kamradt M, Baudendistel I, Langst G, et al. Collaboration and communication in colorectal cancer care: A qualitative study of the challenges experienced by patients and health care professionals. *Family Practice*. 2015;32(6):686-693.



335. Kantsiper M, McDonald EL, Geller G, Shockney L, Snyder C, Wolff AC. Transitioning to breast cancer survivorship: Perspectives of patients, cancer specialists, and primary care providers. *Journal of General Internal Medicine*. 2009;24(Suppl 2):S459-S466.
336. Karius DL, Colvin CM. Managing chemotherapy extravasation across transitions of care: A clinical nurse specialist initiative. *Journal of infusion nursing : the official publication of the Infusion Nurses Society*. 2021;44(1):14-20.
337. Karush JM, Alex G, Geissen N, et al. Predicting non-home discharge after lung surgery: Analysis of the general thoracic surgery database. *The Annals of thoracic surgery*. 2023;115(3):687-692.
338. Kaur J, Mohanti BK. Transition from curative to palliative care in cancer. *Indian journal of palliative care*. 2011;17(1):1-5.
339. Ke Y, Neo PSH, Loh K, et al. Feasibility, delivery, and acceptance of a multidisciplinary survivorship care model based in an asian national ambulatory cancer center: A six-month review. *Journal of Clinical Oncology*. 2020;38(29).
340. Keenan K, Dunne M. Evaluation of a risk-based approach to follow-up care for breast cancer survivors: From oncology specialist to primary care provider (pcp). *Journal of Clinical Oncology*. 2019;37(Supplement 15).
341. Keesing S, Rosenwax L, McNamara B. The implications of women's activity limitations and role disruptions during breast cancer survivorship. *Women's health (London, England)*. 2018;14((McNamara) Curtin University, Perth, WA, Australia):1745505718756381.
342. Keesing S, Rosenwax L, McNamara B. A call to action: The need for improved service coordination during early survivorship for women with breast cancer and partners. *Women & health*. 2019;59(4):406-419.
343. Keinanen A, Uittamo J, Snall J. Oral cancer treatment delay. *Craniomaxillofacial Trauma and Reconstruction*. 2022;15(1 Supplement):4.
344. Kelly D, Altshuler L. Why do cancer patients who are already on treatment transfer their care to another facility? *Journal of Clinical Oncology*. 2015;33(15 SUPPL. 1).
345. Kelly KN, Noyes K, Dolan J, et al. Patient perspective on care transitions after colorectal surgery. *Journal of Surgical Research*. 2016;203(1):103-112.
346. Keng CJ, Lee J, Valencia M, McKechnie T, Forbes S, Eskicioglu C. Transition home following new fecal ostomy creation: A qualitative study. *Journal of wound, ostomy, and continence nursing : official publication of The Wound, Ostomy and Continence Nurses Society*. 2021;48(6):537-543.
347. Kenney-Lueptow J. Inpatient navigation: Utilizing nurse navigation principles to transition patients through hospitalization, discharge, and outpatient care. *Journal of Oncology Navigation & Survivorship*. 2020;11(1):7-13.
348. Kerekes DM, Frey A, Becher RD, Khan SA. Delay in treatment initiation increases mortality in non-metastatic extrahepatic bile duct cancer. *Annals of surgical oncology*. 2022;29(SUPPL 2):S443.
349. Khalid MZ, Majid HJ, Anwar I, Anwar H. Predictors of advanced stage diagnosis and delay in treatment of breast cancer patients in pakistan. *European Journal of Surgical Oncology*. 2022;48(2):e71-e72.
350. Khanna S, Qureshi MM, Agarwal A, Ahuja D, Hirsch AE. Disparities in time from diagnosis to treatment in breast cancer patients at a diverse academic medical center. *International Journal of Radiation Oncology Biology Physics*. 2015;93(3 SUPPL. 1):E37.
351. Kim YA, Choi HR, Choi M, et al. Examining the effectiveness of the discharge plan model on the south korean patients with cancer completed cancer treatment and are returning to the community: A pilot study. *International journal of environmental research and public health*. 2023;20(1):74.
352. Kim YA, Choi MG, Yun EH, et al. A comparative analysis of the perception of cancer patients and healthcare providers (oncology physicians, nurses, social workers) in support of integrated community-linked cancer plans. *International journal of environmental research and public health*. 2021;18(21).

353. Kinahan KE, Sanford S, Sadak KT, Salsman JM, Danner-Koptik K, Didwania A. Models of cancer survivorship care for adolescents and young adults. *Seminars in oncology nursing*. 2015;31(3):251-259.
354. Kirkland S, Garrido Clua M, Junqueira D, Campbell S, Rowe B. Preventing emergency department visits among patients with cancer: A scoping review. *Canadian Journal of Emergency Medicine*. 2020;22(Supplement 1):S90.
355. Kitta A, Hagin A, Unseld M, et al. The silent transition from curative to palliative treatment: A qualitative study about cancer patients' perceptions of end-of-life discussions with oncologists. *Supportive care in cancer : official journal of the Multinational Association of Supportive Care in Cancer*. 2021;29(5):2405-2413.
356. Klimmek RKW. *Understanding the 'work' of transitional cancer survivorship: Case studies of rural older adults and their support persons*, Johns Hopkins University; 2013.
357. Knisely MR, Bartlett Ellis RJ, Carpenter JS. Complexities of medication management across care transitions: A case report. *Clinical nurse specialist CNS*. 2015;29(5):E1-E7.
358. Knowlton SE, Gundersen AI, Reilly JM, Tan CO, Schneider JC, Shih SL. Predictors of acute transfer and mortality within 6 months from admission to an inpatient rehabilitation facility for patients with brain tumors. *Archives of physical medicine and rehabilitation*. 2022;103(3):424-429.
359. Ko E, Cardenas V, Zuniga ML, Woodruff SI, Rodriguez V, Palomino H. Challenges for latina breast cancer patient survivorship care in a rural us-mexico border region. *International journal of environmental research and public health*. 2021;18(13).
360. Ko NY, Patts G, Battaglia TA, et al. Socio-demographic predictors for delay of treatment among a racially diverse, urban breast cancer population. *Cancer Research*. 2017;77(4 Supplement 1).
361. Ko W, Deliens L, Miccinesi G, et al. Care provided and care setting transitions in the last three months of life of cancer patients: A nationwide monitoring study in four european countries. *BMC Cancer*. 2014;14(1):960.
362. Koinberg I, Olofsson EH, Carlström E, Olsson L-E. Impact of a person-centered intervention for patients with head and neck cancer: A qualitative exploration. *BMC Nursing*. 2018;17(1).
363. Kopczynska M, Teubner A, Abraham A, et al. Home parenteral nutrition in patients with advanced cancer: Quality outcomes from a centralized model of care delivery. *Nutrients*. 2022;14(16).
364. Koshikawa T, Shimoyama N. Essentials for transition of palliative care patients to palliative home care and for management of their cancer pain. *Gan to kagaku ryoho Cancer & chemotherapy*. 2006;33(5):611-615.
365. Krishnasamy M, Wells M, Wilkie E. Patients and carer experiences of care provision after a diagnosis of lung cancer in scotland. *Supportive care in cancer : official journal of the Multinational Association of Supportive Care in Cancer*. 2007;15(3):327-332.
366. Kucharczuk C, Lighthead E, Kodan A, et al. Standardized discharge planning tool leads to earlier discharges and fewer readmissions. *Journal of nursing care quality*. 2022;37(1):54-60.
367. Kukar M, Watroba N, Miller A, Kumar S, Edge SB. Fostering coordinated survivorship care in breast cancer: Who is lost to follow-up? *Journal of cancer survivorship : research and practice*. 2014;8(2):199-204.
368. Kumar A, Bhagabaty SM, Tripathy JP, Selvaraj K, Purkayastha J, Singh R. Delays in diagnosis and treatment of breast cancer and the pathways of care: A mixed methods study from a tertiary cancer centre in north east india. *Asian Pacific journal of cancer prevention : APJCP*. 2019;20(12):3711-3721.

369. Kumar RA, Asanad K, Miranda G, et al. Population-based assessment of determining predictors for discharge disposition in patients with bladder cancer undergoing radical cystectomy. *Cancers*. 2022;14(19):4613.
370. Kusajima E, Kawa M, Miyashita M, Kazuma K, Okabe T. Prospective evaluation of transition to specialized home palliative care in Japan. *American Journal of Hospice & Palliative Medicine*. 2009;26(3):172-179.
371. Kvale EA, Huang CHS, Meneses KM, et al. Patient-centered support in the survivorship care transition: Outcomes from the patient-owned survivorship care plan intervention. *Cancer*. 2016((Ritchie) Department of MedicineUniversity of California San FranciscoSan Francisco, California).
372. Kwan JL, Yermak D, Markell L, Paul NS, Shojania KG, Cram P. Follow up of incidental high-risk pulmonary nodules on computed tomography pulmonary angiography at care transitions. *Journal of hospital medicine*. 2019;14(6):349-352.
373. Kyte K, Ekstedt M, Rustoen T, Oksholm T. Longing to get back on track: Patients' experiences and supportive care needs after lung cancer surgery. *Journal of Clinical Nursing*. 2019;28(9-10):1546-1554.
374. Ladaïque AF, Desandes E, Salleron J, et al. [survivorship care plan (scp) : The viewpoints of women with breast cancer and their general practitioners]. *Programme personnalisée d'après cancer (PPAC) : vision des patientes atteintes de cancer du sein et de leur médecin traitant*. 2021;69(5):277-285.
375. Lafferty J, Rankin F, Duffy C, et al. Continuity of care for women with breast cancer: A survey of the views and experiences of patients, carers and health care professionals. *European Journal of Oncology Nursing*. 2011;15(5):419-427.
376. Lafferty M, Fauer A, Wright N, Manojlovich M, Friese CR. Causes and consequences of chemotherapy delays in ambulatory oncology practices: A multisite qualitative study. *Oncology nursing forum*. 2020;47(4):417-427.
377. Lage DE, DuMontier C, Lee Y, et al. Potentially burdensome end-of-life transitions among nursing home residents with poor-prognosis cancer. *Cancer*. 2020;126(6):1322-1329.
378. Lage DE, Johnson PC, Hornstein S, et al. Supportive oncology care at home after discharge for patients with advanced cancer. *Journal of Clinical Oncology*. 2022;40(28 Supplement):295.
379. Lage DE, Schmelkin A, Cohn J, et al. Continuum: A pilot care transition intervention for hospitalized patients with advanced cancer. *Journal of Clinical Oncology*. 2022;40(16 Supplement 1).
380. Lage DE, Nipp RD, D'Arpino S, et al. Post-discharge transitions of care for hospitalized patients with advanced cancer. *Journal of Clinical Oncology*. 2017;35(15 Supplement 1).
381. Lage DE, Nipp RD, D'Arpino SM, et al. Predictors of posthospital transitions of care in patients with advanced cancer. *Journal of Clinical Oncology*. 2018;36(1):76-82.
382. Lakomkin N, Hadjipanayis C. Non-routine discharge disposition is associated with post-discharge complications and 30-day readmissions following craniotomy for brain tumor resection. *Neuro-Oncology*. 2017;19(Supplement 6).
383. Larkin PJ, De Casterle BD, Schotsmans P. Transition towards end of life in palliative care: An exploration of its meaning for advanced cancer patients in europe. *Journal of Palliative Care*. 2007;23(2):69-79.
384. Lau M, Bezjak A. Enhancing continuity of care with the use of palliative radiotherapy treatment summaries (parts). *Journal of Medical Imaging and Radiation Sciences*. 2015;46(1 Supplement 1):S2.

385. Laurent-Badr Q, Barbe C, Brugel M, et al. Time intervals to diagnosis and chemotherapy do not influence survival outcome in patients with advanced pancreatic adenocarcinoma. *Digestive and liver disease : official journal of the Italian Society of Gastroenterology and the Italian Association for the Study of the Liver*. 2020;52(6):658-667.
386. Lawler S, Spathonis K, Masters J, Adams J, Eakin E. Follow-up care after breast cancer treatment: Experiences and perceptions of service provision and provider interactions in rural Australian women. *Supportive Care in Cancer*. 2011;19(12):1975-1982.
387. Lawler S, Spathonis K, Masters J, Adams J, Eakin E. Transition to follow-up care after breast cancer treatment in rural Australia: Women's experiences of service provision. *Asia-Pacific Journal of Clinical Oncology*. 2012;8(SUPPL. 3):240.
388. Lawrenz JM, Featherall J, Curtis GL, et al. Time to treatment initiation and survival in adult localized high-grade bone sarcoma. *Sarcoma*. 2020;2020:2984043.
389. Lawson B, Burge FI, Critchley P, McIntyre P. Factors associated with multiple transitions in care during the end of life following enrollment in a comprehensive palliative care program. *BMC Palliative Care*. 2006;5((McIntyre) Division of Palliative Medicine, Dalhousie University, Capital District Health Authority, Halifax, NS, Canada):4.
390. Leach CR, Troeschel AN, Wiatrek D, et al. Preparedness and cancer-related symptom management among cancer survivors in the first year post-treatment. *Annals of Behavioral Medicine*. 2017;51(4):587-598.
391. Lee SJC, Clark MA, Cox JV, Needles BM, Seigel C, Balasubramanian BA. Achieving coordinated care for patients with complex cases of cancer: A multiteam system approach. *Journal of Oncology Practice*. 2016;12(11):1029-1038.
392. Lee SJC, Jetelina KK, Marks E, et al. Care coordination for complex cancer survivors in an integrated safety-net system: A study protocol 11 medical and health sciences 1117 public health and health services 11 medical and health sciences 1110 nursing. *BMC Cancer*. 2018;18(1):1204.
393. Lees BF, Havighurst TC, Wallace S. Gynecologic oncology postoperative patient discharge experience in the time of enhanced recovery after surgery (ERAS) and opioid epidemic. *Gynecologic oncology*. 2020;159(Supplement 1):281.
394. Lefebvre G, Tresch E, Le J, et al. Hospital discharge organization in oncology: Implementation and assessment of the use of the trajectoire software. *European Research in Telemedicine*. 2016;5(3):77-86.
395. Lefkowitz D. Black boxes and information pathways: An actor-network theory approach to breast cancer survivorship care. *Social science & medicine (1982)*. 2022;307:115184.
396. Leng J, Ntekim AI, Ibraheem A, Anakwenze CP, Golden DW, Olopade OI. Infrastructural challenges lead to delay of curative radiotherapy in Nigeria. *JCO global oncology*. 2020;6:269-276.
397. Lennox GK, Peng J, Murphy KJ, Pulman KJ, Sinasac SE, Feigenberg T. Same-day discharge among patients with obesity undergoing laparoscopic gynaecologic oncology surgery. *Journal of obstetrics and gynaecology Canada : JOGC = Journal d'obstetrique et gynecologie du Canada : JOGC*. 2020;42(8):957-962.
398. Li H, Shu Q, Chen Q, et al. Application effect of team systematic management model on discharge readiness and quality of discharge guidance for rectal cancer patients. *Minerva medica*. 2022;113(3):595-597.
399. Li K, Wang K, Wei X, Leng X, Fang Q. Optimal discharge planning for esophagectomy patients with enhanced recovery after surgery: Recommendations. *Frontiers in surgery*. 2023;10:1112675.
400. Li LT, Barden GM, Balentine CJ, et al. Postoperative transitional care needs in the elderly: An outcome of recovery associated with worse long-term survival. *Annals of Surgery*. 2015;261(4):695-701.

401. Liao T, Qiu L, Zhu J, Li J, Zhang Y, Yang L. A mhealth-based nursing model for assessing the health outcomes of the discharged patients with nasopharyngeal carcinoma: A pilot rct. *BMC nursing*. 2022;21(1):210.
402. Liaquat A, Naseer R, Rashid M, Khan SM, Haq EU, Tayyab TF. The role of socioeconomic status and literacy in the treatment delay in oral cancer patients visiting mayo hospital lahore, pakistan - a tertiary care hospital. *Pakistan Journal of Medical and Health Sciences*. 2021;15(8):1785-1787.
403. Lin C, Kang SY, Donermeyer S, Teknos TN, Wells-Di Gregorio SM. Supportive care needs of patients with head and neck cancer referred to palliative medicine. *Otolaryngology--head and neck surgery : official journal of American Academy of Otolaryngology-Head and Neck Surgery*. 2020;163(2):356-363.
404. Lin Y, Qureshi MM, Tapan U, et al. Reducing delays to lung cancer treatment through systematic consult scheduling: A multidisciplinary quality improvement initiative at a safetynet hospital. *Journal of Clinical Oncology*. 2021;39(15 SUPPL).
405. Liska A, Lamontagne A, Sambrooke K, Snowdon A, Mitchell F. A patient's perspective: Bridging the transition following radiation therapy for patients with breast cancer. *Journal of medical imaging and radiation sciences*. 2020;51(4S):S72-S77.
406. Lithner M, Klefsgard R, Johansson J, Andersson E. The significance of information after discharge for colorectal cancer surgery-a qualitative study. *BMC nursing*. 2015;14(101088683):36.
407. Lizama N, Johnson CE, Ghosh M, Garg N, Emery JD, Saunders C. Keeping primary care "in the loop": General practitioners want better communication with specialists and hospitals when caring for people diagnosed with cancer. *Asia-Pacific Journal of Clinical Oncology*. 2015;11(2):152-159.
408. Lokanatha D, Hassan SA, Jacob LA, et al. Socioeconomic and administrative factors associated with treatment delay of esophageal and gastric carcinoma: Prospective study from a tertiary care centre in a developing country. *Cancer epidemiology*. 2020;67:101770.
409. Lombe DC, Mwamba M, Msadabwe S, et al. Delays in seeking, reaching and access to quality cancer care in sub-saharan africa: A systematic review. *BMJ open*. 2023;13(4):e067715.
410. Lorenz FJ, Mahase SS, Miccio JA, King TS, Pradhan S, Goyal N. Update on adherence to guidelines for time to initiation of postoperative radiation for patients with head and neck cancer. *Otolaryngology - Head and Neck Surgery*. 2022;167(1 Supplement):P111.
411. Losk K, Kadish S, Golshan M, et al. Reducing breast cancer chemotherapy treatment delays by improving the transition from surgical to medical oncology. *Journal of Clinical Oncology*. 2013;31(31 SUPPL. 1).
412. Lowey SE. Care transitions among medicare beneficiaries at the end of life. *Nursing*. 2017;47(6):36-44.
413. Lundereng ED, Dihle A, Steindal SA. Nurses' experiences and perspectives on collaborative discharge planning when patients receiving palliative care for cancer are discharged home from hospitals. *Journal of clinical nursing*. 2020;29(17-18):3382-3391.
414. Lycan TW, Jr., Buckenheimer A, Ruiz J, et al. Team-based hospice referrals: A potential quality metric for lung cancer in the immunotherapy era. *The American journal of hospice & palliative care*. 2023;40(1):10-17.
415. MacArtney JI, Broom A, Kirby E, et al. On resilience and acceptance in the transition to palliative care at the end of life. *Health: An Interdisciplinary Journal for the Social Study of Health, Illness and Medicine*. 2015;19(3):263-279.
416. Madsen R, Birkelund R, Uhrenfeldt L. Transition experiences during courses of incurable cancer from the perspective of bereaved spouses. *European journal of oncology nursing : the official journal of European Oncology Nursing Society*. 2019;38((Uhrenfeldt) Faculty of Nursing and Health Science, Nord University, Bodo, Norway):28-35.
417. Magnoli M, Murgitroyd E, Lamb PJ, Skipworth RJE. Are delays to diagnosis and treatment associated with reduced survival in oesophageal cancer? *British Journal of Surgery*. 2021;108(SUPPL 7):vii84-vii85.

418. Magrowski L, Nowicka E, Masri O, Tukiendorf A, Tarnawski R, Miszczyk M. The survival impact of significant delays between surgery and radiochemotherapy in glioblastoma patients: A retrospective analysis from a large tertiary center. *Journal of Clinical Neuroscience*. 2021;90:39-47.
419. Maiedema B, Tatemichi S, MacDonald I. Cancer follow-up care in new brunswick: Cancer surveillance, support issues and fear of recurrence. *Canadian journal of rural medicine : the official journal of the Society of Rural Physicians of Canada = Journal canadien de la medecine rurale : le journal officiel de la Societe de medecine rurale du Canada*. 2004;9(2):101-107.
420. Majeed I, Ammanuallah R, Anwar AW, Rafique HM, Imran F. Diagnostic and treatment delays in breast cancer in association with multiple factors in Pakistan. *Eastern Mediterranean Health Journal*. 2022;28(1):23-32.
421. Malam S, Lawrence B, Bradley C, et al. Integrating survivorship care into a radiation medicine program. *Cureus*. 2020;12(5):e8013.
422. Malebranche M, Sarivalasis A, Peters S, Mathevet P, Cornuz J, Bodenmann P. Primary care-led transition clinics hold promise in improving care transitions for cancer patients facing social disparities: A commentary. *Journal of primary care & community health*. 2020;11:2150132720957455.
423. Malloy KM, Pou AM. Survivorship: Morbidity, mortality, malignancy. *Otolaryngologic Clinics of North America*. 2017;50(4):853-866.
424. Maloney CH, Preston F. An overview of home care for patients with cancer. *Oncology nursing forum*. 1992;19(1):75-80.
425. Manzano JGM, Lin H, Zhao H, Halm J, Suarez-Almazor ME. Derivation and validation of the cancer readmit score: A readmission risk scoring system for patients with solid tumor malignancies. *JCO oncology practice*. 2022;18(2):E117-E128.
426. Manzano J-GM, Gadiraju S, Hiremath A, Lin HY, Farroni J, Halm J. Unplanned 30-day readmissions in a general internal medicine hospitalist service at a comprehensive cancer center. *Journal of oncology practice*. 2015;11(5):410-415.
427. Mapanga W, Norris SA, Chen WC, et al. Consensus study on the health system and patient-related barriers for lung cancer management in south africa. *PloS one*. 2021;16(2):e0246716.
428. Marcickiewicz J, Åvall-Lundqvist E, Holmberg ECV, et al. The wait time to primary surgery in endometrial cancer – impact on survival and predictive factors: A population-based swegcg study. *Acta Oncologica*. 2022;61(1):30-37.
429. Marcus LP, McCutcheon BA, Noorbakhsh A, et al. Incidence and predictors of 30-day readmission for patients discharged home after craniotomy for malignant supratentorial tumors in california (1995-2010). *Journal of neurosurgery*. 2014;120(5):1201-1211.
430. Margariti C, Gannon KN, Walsh JJ, Green JSA. Gp experience and understandings of providing follow-up care in prostate cancer survivors in england. *Health & social care in the community*. 2020;28(5):1468-1478.
431. Marston C, Morgan DD, Philip J, Agar MR. Experience and acceptability of a carer-focussed intervention in acute oncology settings: A qualitative study of people with advanced cancer and their carers. *Australian occupational therapy journal*. 2023.
432. Marwah R, Goonetilleke D, Smith J, Chilkuri M. Evaluating delays in patients treated with post-operative radiation therapy for head and neck squamous cell carcinoma. *Journal of medical imaging and radiation oncology*. 2022;66(6):840-846.
433. Mateo AM, Mazor AM, Obeid E, et al. Time to surgery and the impact of delay on triple negative breast cancers and other phenotypes. *Journal of Clinical Oncology*. 2018;36(15 Supplement 1).
434. Mateo AM, Mazor AM, Obeid E, et al. Time to surgery and the impact of delay in the non-neoadjuvant setting on triple-negative breast cancers and other phenotypes. *Annals of surgical oncology*. 2020;27(5):1679-1692.

435. Mateshaytis J, Brawner M, Steed H, Pin S. Improving the rate of same-day discharge in gynecologic oncology patients with endometrial cancer undergoing minimally invasive robotic surgery: A quality improvement initiative. *Journal of minimally invasive gynecology*. 2022;29(10):1184-1193.
436. Mattei LH, Polan RM, Ruterbusch JJ, Cote ML. Interaction of race and socioeconomic status as risk modulators of treatment delay and cancer-specific mortality in uterine cancer. *Journal of Clinical Oncology*. 2022;40(16 Supplement 1).
437. Mattessich NT. Goals-to-discharge patient checklist: Implementing a program to optimize recovery after surgery for patients with colorectal cancer. *Clinical journal of oncology nursing*. 2020;24(3):316-319.
438. Matthai A, Hicks-Courant K, Ko E, Haggerty A. Redefining readmissions in gynecologic cancer: Readmissions resulting in hospital-to-hospice transitions may represent high value care. *Gynecologic oncology*. 2021;162(Supplement 1):S260.
439. Mattos LFV, de Sousa ARN, Teixeira JF, Costa MF, de Castilho SR. The role of the pharmacist in the hospital discharge of cancer patients: An integrative review. *Journal of oncology pharmacy practice : official publication of the International Society of Oncology Pharmacy Practitioners*. 2023;10781552231160678.
440. Mayer D, Deal AM, Crane JM, et al. Using survivorship care plans (scp) to improve cancer communication and care coordination. *Journal of Clinical Oncology*. 2015;33(15 SUPPL. 1).
441. Mayer DK, Gerstel A, Leak AN, Smith SK. Patient and provider preferences for survivorship care plans. *Journal of Oncology Practice*. 2012;8(4):e80-e86.
442. Mayer DK, Green M, Check DK, et al. Is there a role for survivorship care plans in advanced cancer? *Supportive Care in Cancer*. 2015;23(8):2225-2230.
443. Mazariego CG, Laidsaar-Powell R, Smith DP, Juraskova I. Avoiding the 'survivorship abyss': Qualitative insights from 15-year prostate cancer survivors. *Psycho-oncology*. 2021;30(10):1745-1755.
444. McBride A, Campen CJ, Camamo J, et al. Implementation of a pharmacy-managed program for the transition of chemotherapy to the outpatient setting. *American journal of health-system pharmacy : AJHP : official journal of the American Society of Health-System Pharmacists*. 2018;75(9):e246-e258.
445. Meiklejohn JA, Bailie R, Adams J, et al. "I'm a survivor": Aboriginal and torres strait islander cancer survivors' perspectives of cancer survivorship. *Cancer nursing*. 2020;43(2):105-114.
446. Meiklejohn JA, Garvey G, Bailie R, et al. Follow-up cancer care: Perspectives of aboriginal and torres strait islander cancer survivors. *Supportive Care in Cancer*. 2017;25(5):1597-1605.
447. Mercadante S, Bruera E. Acute palliative care units: Characteristics, activities and outcomes - scoping review. *BMJ supportive & palliative care*. 2023.
448. Mercadante S, Giuliana F, Bellingardo R, Albegiani G, Di Silvestre G, Casuccio A. Pattern and characteristics of patients admitted to a hospice connected with an acute palliative care unit in a comprehensive cancer center. *Supportive care in cancer : official journal of the Multinational Association of Supportive Care in Cancer*. 2022;30(3):2811-2819.
449. Metcalfe C, Dogan M, Glazzard N, Ross E, George A. Introduction of a novel telescopic pathway to streamline 2-week-wait suspected head and neck cancer referrals and improve efficiency: A prospective service evaluation. *Laryngoscope investigative otolaryngology*. 2022;7(1):117-124.
450. Mettias B, Charlton A, Ashokkumar S. Two-week-wait referrals in otolaryngology in a tertiary centre: Cross-sectional study of benign outcomes, with a systematic review. *Journal of Laryngology & Otology*. 2022;136(11):1051-1055.
451. Metzger K, Moratin J, Horn D, et al. Treatment delay in early-stage oral squamous cell carcinoma and its relation to survival. *Journal of cranio-maxillo-facial surgery : official publication of the European Association for Cranio-Maxillo-Facial Surgery*. 2021;49(6):462-467.
452. Meyer A. Easing the transition to palliative care. *Nursing New Zealand (Wellington, NZ : 1995)*. 2009;15(2):18-19.

453. Mian Ng S, Poole W, Zangiabadi A, Tamjid B. Lung cancer care pathway at peninsula health: A retrospective study. *Asia-Pacific journal of clinical oncology*. 2020;16(SUPPL 8):174.
454. Michiels E, Deschepper R, Van Der Kelen G, et al. The role of general practitioners in continuity of care at the end of life: A qualitative study of terminally ill patients and their next of kin. *Palliative Medicine*. 2007;21(5):409-415.
455. Mielczarek L, Zapala P, Krajewski W, et al. Diagnostic and treatment delays among patients with primary bladder cancer in poland: A survey study. *Central European Journal of Urology*. 2020;73(2):152-159.
456. Mikal JP, Beckstrand MJ, Grande SW, et al. Online support seeking and breast cancer patients: Changes in support seeking behavior following diagnosis and transition off cancer therapy. *Health communication*. 2021;36(6):731-740.
457. Mikal JP, Beckstrand MJ, Parks E, et al. Online social support among breast cancer patients: Longitudinal changes to facebook use following breast cancer diagnosis and transition off therapy. *Journal of cancer survivorship : research and practice*. 2020;14(3):322-330.
458. Mikal JP, Beckstrand MJ, Parks E, et al. Online social support among breast cancer patients: Longitudinal changes to facebook use following breast cancer diagnosis and transition off therapy. *Journal of cancer survivorship : research and practice*. 2020(101307557).
459. Milesky JL, Baptiste D-L, Shelton BK. An observational study of patient handover communications among nurses on an oncology critical care unit. *Contemporary Nurse: A Journal for the Australian Nursing Profession*. 2018;54(1):77-87.
460. Miller K, Doherty L, Robison K. Integration of survivorship program into outpatient gynecologic oncology office setting. *Gynecologic oncology*. 2021;162(Supplement 1):S190-S191.
461. Miller SJ, Desai N, Pattison N, et al. Quality of transition to end-of-life care for cancer patients in the intensive care unit. *Annals of Intensive Care*. 2015;5(1):18.
462. Mills SEE, Geneen LJ, Buchanan D, Guthrie B, Smith BH. Factors associated with unscheduled care use by cancer decedents: A systematic review with narrative synthesis. *BMJ supportive & palliative care*. 2020.
463. Mimouni H, Hassouni K, El Marnissi B, et al. The care pathway delays of cervical cancer patient in morocco. *Obstetrics and gynecology international*. 2020;2020:8796570.
464. Mimouni H, Hassouni K, El Marnissi B, et al. The patient, diagnosis and treatment delay of the care pathway of patients with breast cancer in morocco. *Annals of Cancer Research and Therapy*. 2022;30(1):11-17.
465. Missel M, Schonau MN, Pedersen JH, Pedersen PU. Transition from hospital to daily life: A pilot study. *Rehabilitation nursing : the official journal of the Association of Rehabilitation Nurses*. 2015;40(1):20-29.
466. Miura T, Matsumoto Y, Okizaki A, et al. A retrospective study of the factors tended to transfer to palliative home care from palliative care unit at a comprehensive cancer center in japan. *Annals of Oncology*. 2012;23(SUPPL. 9).
467. Mollica M, Nemeth L. Transition from patient to survivor in african american breast cancer survivors. *Cancer nursing*. 2015;38(1):16-22.
468. Montero AJ, Stevenson J, Guthrie AE, et al. Reducing unplanned medical oncology readmissions by improving outpatient care transitions: A process improvement project at the cleveland clinic. *Journal of Oncology Practice*. 2016;12(5):e594-e602.
469. Monterosso L, Taylor K, Platt V, et al. A qualitative study of the post-treatment experiences and support needs of survivors of lymphoma. *European journal of oncology nursing : the official journal of European Oncology Nursing Society*. 2017;28((Joske) University of Western Australia, Crawley, Western Australia, Australia; Sir Charles Gairdner Hospital, Nedlands, Western Australia, Australia):62-68.



470. Montiel Ishino FA, Rowan C, Das R, et al. Identifying risk profiles of malignant prostate cancer surgical delay using a person-centered approach to understand prostate cancer disparities: The constellation of health determinants using latent class analysis on cancer registry data. *American journal of men's health*. 2020;14(6):1557988320984282.
471. Moon EW, Wong JSM, See AHM, et al. Predicting early and late readmissions following cytoreductive surgery and hyperthermic intraperitoneal chemotherapy. *Annals of surgical oncology*. 2021;28(11):6613-6624.
472. Moon J, Pang A, Ghitulescu G, et al. Early discharge after colorectal cancer resection: Trends and impact on patient outcomes. *Surgical endoscopy*. 2022;36(9):6617-6628.
473. Mooney K, Dumas K, Fausett A, Littledike M, Ulrich CM, Titchener K. Oncology hospital at home in rural communities: The huntsman at home rural experience. *Journal of Clinical Oncology*. 2022;40(16 Supplement 1).
474. Mooney K, Titchener K, Haaland B, et al. Evaluation of oncology hospital at home: Unplanned health care utilization and costs in the huntsman at home real-world trial. *Journal of clinical oncology : official journal of the American Society of Clinical Oncology*. 2021;39(23):2586-2593.
475. Moore NJ, Othus M, Halpern AB, et al. Financial implications of early hospital discharge after aml-like induction chemotherapy: A 4-year retrospective analysis. *Journal of the National Comprehensive Cancer Network : JNCCN*. 2021:1-10.
476. Morell A, Samborski A, Williams D, et al. Calculating surgical readmission rates in gynecologic oncology: The impact of patient factors. *Gynecologic oncology*. 2023;172:115-120.
477. Morey T, Scott M, Saunders S, et al. Transitioning from hospital to palliative care at home: Patient and caregiver perceptions of continuity of care. *Journal of pain and symptom management*. 2021;62(2):233-241.
478. Morisaku M, Ito K, Shimomura T, et al. Early palliative care improves overall survival in patients with lymphoma: A single-institution retrospective study. *In Vivo*. 2022;36(6):2910-2917.
479. Morita T, Akechi T, Ikenaga M, et al. Communication about the ending of anticancer treatment and transition to palliative care. *Annals of Oncology*. 2004;15(10):1551-1557.
480. Morita T, Fujimoto K, Namba M, et al. Palliative care needs of cancer outpatients receiving chemotherapy: An audit of a clinical screening project. *Supportive Care in Cancer*. 2008;16(1):101-107.
481. Morita T, Imura C, Fujimoto K, Shishido H, Tei Y, Inoue S. Changes in medical and nursing care in cancer patients transferred from a palliative care team to a palliative care unit. *Journal of Pain and Symptom Management*. 2005;29(6):595-602.
482. Moser A, Melchior I, Veenstra M, Stoffers E, Derks E, Jie KS. Improving the experience of older people with colorectal and breast cancer in patient-centred cancer care pathways using experience-based co-design. *Health Expectations*. 2021;24(2):478-490.
483. Mou J, Bolieu EL, Pflugeisen BM, et al. Delay in treatment after cancer diagnosis in adolescents and young adults: Does facility transfer matter? *Journal of Adolescent and Young Adult Oncology*. 2019;8(3):243-253.
484. Moura S, Nguyen P, Benea A, Townsley C. The development and implementation of the after cancer treatment transition (actt) program for survivors of cancer. *Canadian oncology nursing journal = Revue canadienne de nursing oncologique*. 2022;32(1):3-11.
485. Mukherjee SD, Bainbridge D, Hillis C, Sussman J. Optimizing cancer survivorship care: Examination of factors associated with transition to primary care. *Current oncology (Toronto, Ont)*. 2023;30(3):2743-2750.

486. Muktar S, Thiruchelvam PXR, Hadjiminias D. Patients' views of follow-up care after treatment for breast cancer: A comparison of 2 approaches. *Journal of Oncology Navigation & Survivorship*. 2015;6(6):22-29.
487. Murphy CT, Galloway TJ, Handorf EA, et al. Increasing time to treatment initiation for head and neck cancer: An analysis of the national cancer database. *Cancer*. 2015;121(8):1204-1213.
488. Muslim Z, Stroever S, Razi SS, et al. Increasing time-to-treatment for lung cancer: Are we going backward? *Annals of Thoracic Surgery*. 2023;115(1):192-199.
489. Mussab K, Max E, Andrea W, Stefan SM, Thomas E, Orlando GL. Comparison of treatment delay for head and neck cancer at a tertiary university hospital between 2003, 2008 and 2013. *Laryngo- Rhino- Otologie*. 2022;101(Supplement 2):S195.
490. Nahm ES, Miller K, McQuaige M, et al. Testing the impact of a cancer survivorship patient engagement toolkit on selected health outcomes. *Oncology nursing forum*. 2019;46(5):572-584.
491. Nam GH, Chang WH. Factors associated with unplanned transfer of patients with brain tumor from inpatient rehabilitation unit to primary acute care units. *Journal of personalized medicine*. 2023;13(1).
492. Napoles AM, Ortiz C, Santoyo-Olsson J, et al. Posttreatment survivorship care needs of spanish-speaking latinas with breast cancer. *Journal of Community and Supportive Oncology*. 2017;15(1):20-27.
493. Nathan C. Differences in transitions of care among cancer patients with and without venous thromboembolism (vte) events. *Journal of Clinical Oncology*. 2021;39(15 SUPPL).
494. Navarro S, Yang Y, Ochoa C, et al. Breast cancer surgical delays in a racially and ethnically diverse california cancer registry cohort. *Journal of Clinical Oncology*. 2021;39(15 SUPPL).
495. Nazareth I, Jones L, Irving A, et al. Perceived concepts of continuity of care in people with colorectal and breast cancer: A qualitative case study analysis. *European Journal of Cancer Care*. 2008;17(6):569-577.
496. Nekhlyudov L, Schnipper JL. Cancer survivorship care plans: What can be learned from hospital discharge summaries? *Journal of Oncology Practice*. 2012;8(1):24-29.
497. Nemirovsky DR, Klose C, Wynne M, et al. Role of race and insurance status in prostate cancer diagnosis-to-treatment interval. *Clinical genitourinary cancer*. 2023;21(3):e198-e203.
498. Neron M, Lambaudie E, Thezenas S, et al. Impact of time to radiation therapy in adjuvant settings in endometrial carcinoma: A multicentric retrospective study. *European Journal of Obstetrics and Gynecology and Reproductive Biology*. 2020;247:121-126.
499. Nguyen D-D, Haeuser L, Paciotti M, et al. Systematic review of time to definitive treatment for intermediate risk and high risk prostate cancer: Are delays associated with worse outcomes? *The Journal of urology*. 2021;205(5):1263-1274.
500. Nguyen N, Zhao X, Ponzini M, Wilson M, Leiserowitz G, Brooks R. Time to completion of radiation treatment in locally advanced vulvar cancer and the impact on survival. *Gynecologic oncology*. 2022;164(1):11-12.
501. Nguyen P, Azizi-Mehr P, Townsley C, Zahedi A. Outcomes of early transition of low-risk thyroid cancer patients from specialist to primary care. *Current oncology (Toronto, Ont)*. 2022;29(10):7672-7679.
502. Nieminen M, Atula T, Back L, Makitie A, Jouhi L, Aro K. Factors influencing patient and health care delays in oropharyngeal cancer. *Journal of otolaryngology - head & neck surgery = Le Journal d'oto-rhino-laryngologie et de chirurgie cervico-faciale*. 2020;49(1):22.

503. Nikonova A, Guirguis HR, Buckstein R, Cheung MC. Predictors of delay in diagnosis and treatment in diffuse large b-cell lymphoma and impact on survival. *British Journal of Haematology*. 2015;168(4):492-500.
504. Nissim R, Rodin G, Schimmer A, et al. Finding new bearings: A qualitative study on the transition from inpatient to ambulatory care of patients with acute myeloid leukemia. *Supportive care in cancer : official journal of the Multinational Association of Supportive Care in Cancer*. 2014;22(9):2435-2443.
505. Nkosi PB, Sibiyi MN. A practice framework for the cooperative treatment of cancer between traditional health practitioners and radiation oncologists in kwazulu-natal province, south africa. *Health SA = SA Gesondheid*. 2021;26:1427.
506. Nocon CC, Liederbach E, Sisco M, et al. Factors affecting delays to surgery for oral tongue carcinoma in the national cancer data base. *Otolaryngology - Head and Neck Surgery (United States)*. 2014;151(1 SUPPL. 1):P56.
507. Nogueira MC, Atty ATM, Tomazelli J, Jardim BC, Bustamante-Teixeira MT, Azevedo ESG. Frequency and factors associated with delay in breast cancer treatment in Brazil, according to data from the oncology panel, 2019-2020. *Epidemiologia e servicos de saude : revista do Sistema Unico de Saude do Brasil*. 2023;32(1):e2022563.
508. Nordly M, Skov Benthien K, Soelberg Vadstrup E, et al. Accelerated transition from oncological treatment to specialized palliative care at home: Domus-a randomized controlled trial. *Palliative Medicine*. 2018;32(1 Supplement 1):89.
509. Nordt SP, Ryan JM, Kelly D, et al. Palliative care patient emergency department visits at tertiary university-based emergency department in ireland. *The American journal of emergency medicine*. 2023;66:76-80.
510. Northfield S, Button E, Wyld D, Gavin NC, Nasato G, Yates P. Taking care of our own: A narrative review of cancer care services-led models of care providing emergent care to patients with cancer. *European Journal of Oncology Nursing*. 2019;40(Young, A., Marshall, E., Krzyzanowska, M., Robinson, B., Brown, S., Collinson, F., et al. (2016). Responding to acute care needs of patients with cancer: recent trends across continents. *Oncol*, 21, 3, 301-307. [http://dx.doi.org/10.1634/theoncologist.2014-\):85-97](http://dx.doi.org/10.1634/theoncologist.2014-):85-97).
511. Norton SA, Wittink MN, Duberstein PR, Prigerson HG, Stanek S, Epstein RM. Family caregiver descriptions of stopping chemotherapy and end-of-life transitions. *Supportive care in cancer : official journal of the Multinational Association of Supportive Care in Cancer*. 2019;27(2):669-675.
512. Noteboom EA, de Wit NJ, van Asseldonk IJEM, et al. Off to a good start after a cancer diagnosis: Implementation of a time out consultation in primary care before cancer treatment decision. *Journal of cancer survivorship : research and practice*. 2020;14(1):9-13.
513. Nowak M, Swora M, Karbach U, Pfaff H, Ansmann L. Associations between hospital structures, processes and patient experiences of preparation for discharge in breast cancer centers: A multilevel analysis. *Health care management review*. 2021;46(2):98-110.
514. Noyes EA, Burks CA, Larson AR, Deschler DG. An equity-based narrative review of barriers to timely postoperative radiation therapy for patients with head and neck squamous cell carcinoma. *Laryngoscope investigative otolaryngology*. 2021;6(6):1358-1366.
515. Numata K, Shirotani N, Iwamoto Y. Home medical treatment and the transfer of medical care of patients at tokyo women's medical university. *Gan to kagaku ryoho Cancer & chemotherapy*. 2006;33 Suppl 2((Numata, Shirotani, Iwamoto) Dept. of Home Care Support/Promotion, Tokyo Women's Medical University.):299-301.
516. O'Brien MA, Grunfeld E, Sussman J, Porter G, Hammond Mobilio M. Views of family physicians about survivorship care plans to provide breast cancer follow-up care: Exploration of results from a randomized controlled trial. *Current Oncology*. 2015;22(4):252-259.
517. Obrochta CA, Gibbons J, Nara A, Murphy JD, Thompson CA. Neighborhood disparities in timeliness of treatment for early stage lung cancer patients. *Journal of Clinical Oncology*. 2020;38(15).

518. Obrochta CA, Murphy JD, Tsou MH, Thompson CA. Disentangling racial, ethnic, and socioeconomic disparities in treatment for colorectal cancer. *Cancer Epidemiology Biomarkers and Prevention*. 2021;30(8):1546-1553.
519. Ogura K, Fujiwara T, Healey JH. Patients with an increased time to treatment initiation have a poorer overall survival after definitive surgery for localized high-grade soft-tissue sarcoma in the extremity or trunk : Report from the national cancer database. *The bone & joint journal*. 2021;103-B(6):1142-1149.
520. O'Hea E, Wu J, Dietzen L, Harralson T, Boudreaux ED. The polaris oncology survivorship transition (post) system: A patient- and provider-driven cancer survivorship planning program. *Journal of oncology navigation & survivorship*. 2016;7(10):11-24.
521. O'Hea EL, Creamer S, Flahive JM, et al. Survivorship care planning, quality of life, and confidence to transition to survivorship: A randomized controlled trial with women ending treatment for breast cancer. *Journal of psychosocial oncology*. 2022;40(5):574-594.
522. Oksholm T, Rustoen T, Ekstedt M. Transfer between hospitals is a risk situation for patients after lung cancer surgery. *Cancer Nursing*. 2018;41(3):E49-E55.
523. O'Malley DM, Doose M, Howard J, Cantor JC, Crabtree BF, Tsui J. Examining medicaid-serving primary care teams and delivery context on quality of care transitions to oncology: Implications for health equity. *Cancer Epidemiology Biomarkers and Prevention*. 2023;32(1 Supplement).
524. Ornstein KA, Meier DE. Beyond enrollment: Providing the highest-quality care within hospice. *Journal of the American Geriatrics Society*. 2016;64(2):330-331.
525. Ortega A, Goulding T. Duplicate testing: Enhancing transitions in care communication in the infusion center and emergency department settings. *Clinical journal of oncology nursing*. 2021;25(2):201-204.
526. Ourfali S, Matillon X, Ricci E, et al. Prognostic implications of treatment delays for patients with non-muscle-invasive bladder cancer. *European urology focus*. 2022;8(5):1226-1237.
527. Pace A, Belleudi V, Tanzilli A, et al. Pattern of care of brain tumor patients in the last months of life: Analysis of a cohort of 3045 patients in the last 10 years. *Neurological sciences : official journal of the Italian Neurological Society and of the Italian Society of Clinical Neurophysiology*. 2023.
528. Padgett L, McSpadden K. Barriers and facilitators to implementation of survivorship care: Lessons learned from the national cancer institute community cancer centers program. *Psycho-Oncology*. 2013;22(SUPPL. 2):1.
529. Padilla-Ruiz M, Zarcos-Pedrinaci I, Rivas-Ruiz F, et al. Factors that influence treatment delay for patients with breast cancer. *Annals of surgical oncology*. 2021;28(7):3714-3721.
530. Paek J, Lim PC. Enhanced recovery after surgery (eras) protocol for early discharge within 12 hours after robotic radical hysterectomy. *Journal of clinical medicine*. 2022;11(4).
531. Page JS, Lederman L, Kelly J, Barry MM, James TA. Teams and teamwork in cancer care delivery: Shared mental models to improve planning for discharge and coordination of follow-up care. *Journal of Oncology Practice*. 2016;12(11):1053-1058.
532. Page M, Molina IM, Patt J, Chang SM. Care of the caregiver: Transitions at the end of life. *Journal of Clinical Oncology*. 2014;32(31 SUPPL. 1).
533. Pairawan SS, Bonnick K, Dominguez C, et al. Impact of delay in definitive surgery in stage 3 merkel cell carcinoma. *Journal of the American College of Surgeons*. 2021;233(5 Supplement 2):e181.
534. Palmer NRA. Goals, plans, and behavior changes: A relevant part of the post-treatment cancer experience. *Dissertation Abstracts International: Section B: The Sciences and Engineering*. 2011;71(9-B):5413.
535. Pandya C, Clarke T, Scarsella E, et al. Ensuring effective care transition communication: Implementation of an electronic medical record-based tool for improved cancer treatment handoffs between clinic and infusion nurses. *Journal of Oncology Practice*. 2019;15(5):E480-E489.

536. Paraghamian SE, Davies EM, Weiner AA. Radiation treatment at multiple centers and treatment delays during definitive chemoradiation for treatment of cervical cancer. *Gynecologic oncology*. 2020;159(Supplement 1):183.
537. Park CL, Fritzon E, Gnall KE, et al. Resilience across the transition to cancer survivorship. *Research in human development*. 2021;18(3):197-211.
538. Parker PD, McSweeney JC, McQueen A, Jin J, Bryant-Smith G, Henry-Tillman R. "I'm not fighting anymore so what do i do now?" Young women's challenges while transitioning out of active breast cancer treatment and into survivorship. *Inquiry : a journal of medical care organization, provision and financing*. 2023;60:469580231164230.
539. Parry C, Morningstar E, Kendall J, Coleman EA. Working without a net: Leukemia and lymphoma survivors' perspectives on care delivery at end-of-treatment and beyond. *Journal of Psychosocial Oncology*. 2011;29(2):175-198.
540. Parsons M, Lloyd S, Johnson S, et al. The implications of treatment delays in adjuvant therapy for resected cholangiocarcinoma patients. *Journal of gastrointestinal cancer*. 2022.
541. Pascoe SW, Veitch C, Crossland LJ, et al. Patients' experiences of referral for colorectal cancer. *BMC family practice*. 2013;14(100967792):124.
542. Patel BG, McCaffrey S, Natarajan A, et al. Real-world outcomes of telehealth initiative to reduce readmissions for patients with cancer. *Journal of Clinical Oncology*. 2022;40(28 Supplement):387.
543. Patel DC, Leipzig M, Jeffrey Yang C-F, et al. Early discharge after lobectomy for lung cancer does not equate to early readmission. *The Annals of thoracic surgery*. 2022;113(5):1634-1640.
544. Patel SD, Nguyen PAA, Bachler M, Atkinson B. Implementation of postdischarge follow-up telephone calls at a comprehensive cancer center. *American Journal of Health-System Pharmacy*. 2017;74(11 Supplement 2):S42-S46.
545. Pateman B, Wilson K, McHugh G, Luker KA. Continuing care after cancer treatment. *Journal of advanced nursing*. 2003;44(2):192-199.
546. Pathak P, Dalmacy D, Tsilimigras D, Hyer M, Diaz A, Pawlik TM. Caring for patients with complications after complex gastrointestinal surgery: A national study of interhospital transfer among medicare beneficiaries. *Gastroenterology*. 2021;160(6 Supplement):S-902.
547. Patra L, Ghoshal A, Damani A, Salins N. Cancer palliative care referral: Patients' and family caregivers' perspectives - a systematic review. *BMJ supportive & palliative care*. 2022.
548. Payne SA, Hasselaar J. Exploring the concept of transitions in advanced cancer care: The european pal\_cycles project. *Journal of palliative medicine*. 2023;26(6):744-745.
549. Pedersen AE, Hack TF, McClement SE, Taylor-Brown J. An exploration of the patient navigator role: Perspectives of younger women with breast cancer. *Oncology nursing forum*. 2014;41(1):77-88.
550. Pepin AN, Zwart A, Danner M, et al. Treatment interruptions during stereotactic body radiotherapy for prostate cancer. *Frontiers in oncology*. 2022;11:796496.
551. Pereira Shimada GD, Archanjo da Mota A, Carvalho de Souza M, Bernardes SS. Time-to-treatment initiation for cutaneous melanoma reflects disparities in healthcare access in Brazil: A retrospective study. *Public health*. 2022;210:1-7.
552. Perfors IAA, Noteboom EA, de Wit NJ, et al. Effects of a time out consultation with the general practitioner on cancer treatment decision-making: A randomised controlled trial. *Psycho-oncology*. 2021;30(4):571-580.
553. Perrin N. From the hospital to home. *Soins; la revue de reference infirmiere*. 1994(585-586):39-43.
554. Petrovic B, Julian JA, Liddy C, et al. Web-based asynchronous tool to facilitate communication between primary care providers and cancer specialists: Pragmatic randomized controlled trial. *Journal of medical Internet research*. 2023;25:e40725.

555. Pham D, Bhandari S, Pinkston C, Oechsli M, Kloecker G. Nsclc patient "migration" for treatment: A retrospective analysis of patient characteristics, travel patterns, and survival differences. *Current problems in cancer*. 2020;44(4):100528.
556. Phansuwon K, Tan SY, Kerin-Ayers K, et al. Evaluation of survivorship care plans in survivors attending the sydney cancer survivorship centre (scsc) clinic. *Asia-Pacific journal of clinical oncology*. 2019;15(SUPPL 9):210-211.
557. Philip J, Le Gautier R, Collins A, et al. Care plus study: A multi-site implementation of early palliative care in routine practice to improve health outcomes and reduce hospital admissions for people with advanced cancer: A study protocol. *BMC health services research*. 2021;21(1):513.
558. Philip J, Collins A, Staker J, Murphy M. I-cope: A pilot study of structured supportive care delivery to people with newly diagnosed high-grade glioma and their carers. *Neuro-oncology practice*. 2019;6(1):61-70.
559. Phillips WW, Copeland J, Hofferberth SC, et al. Lung cancer strategist program: A novel care delivery model to improve timeliness of diagnosis and treatment in high-risk patients. *Healthcare (Amsterdam, Netherlands)*. 2021;9(3):100563.
560. Pinheiro LC, Rajan M, Safford MM, Nanus DM, Kern LM. Nearly all cancer survivors return to primary care. *Journal of the American Board of Family Medicine : JABFM*. 2022;35(4):827-832.
561. Pisotska L, Regber L, Wuerflein D, Wagner H, Ficker J, Bruckl W. Delays and delaying factors from symptoms to diagnosis in lung cancer. *Oncology research and treatment*. 2020;43(Supplement 1):111.
562. Poortmans P, De Olivera A, Minsat M, et al. Fast reduction of delays in initiation of radiation therapy after introduction of lean management. *Radiotherapy and Oncology*. 2020;152(Supplement 1):S676.
563. Porritt L, Piercy J, Waterhouse C, Menon A, Bharucha S. Early cns and navigator intervention on upper gi cancer pathway improves the patient journey. *Gut*. 2022;71(Supplement 1):A190.
564. Prince M, Allen D, Chittenden S, Misuraca J, Hockenberry MJ. Improving transitional care: The role of handoffs and discharge checklists in hematologic malignancies. *Clinical journal of oncology nursing*. 2019;23(1):36-42.
565. Prsic EH, Teno JM, Gozalo P. Site of death, place of care, and burdensome transitions among patients with advanced solid tumor malignancies or leukemia between 2000 and 2010. *Journal of Clinical Oncology*. 2015;33(29 SUPPL. 1).
566. Pumpalova YS, Ayeni OA, Chen WC, et al. The impact of breast cancer treatment delays on survival among south african women. *Oncologist*. 2022;27(3):E233-E243.
567. Qatanani AM, Eide JG, Harris JC, et al. The impact of delay in treatment on survival in surgically managed sinonasal undifferentiated carcinoma. *Journal of Neurological Surgery, Part B: Skull Base*. 2022.
568. Qiu JM, DeVecchio Good M-J. Making the best of multidisciplinary care for patients with malignant fungating wounds: A qualitative study of clinicians' narratives. *Palliative medicine*. 2021;35(1):179-187.
569. Qu LG, Jack G, Perera M, et al. Impact of delay from transperineal biopsy to radical prostatectomy upon objective measures of cancer control. *Asian Journal of Urology*. 2022;9(2):170-176.
570. Quinza Real A, Wigmore TW. Outcome of hemato-oncology patients transferred to the critical care unit in the last five years at royal marsden hospital. *Critical Care*. 2017;21(1 Supplement 1).
571. Radhakrishnan A, Choi Y, Berger Z, Pollack CE, Dy SM, Pears KS. Implementation of a novel primary care-centered clinic for survivorship care. *Journal of Clinical Oncology*. 2017;35(5\_suppl):41-41.

572. Raeymaekers B, Vandezande L, De Leyn AM, Dancet E, Christiaens MR. A feasible nurse-led project to improve the continuity in breast cancer care. *European Journal of Cancer*. 2014;50(SUPPL. 2):S86.
573. Rahool R, Haider G, Hayat M, et al. Factors associated with treatment delay in breast cancer: A prospective study. *Cureus*. 2021;13(2):e13242.
574. Raiss M, Mehta K, Kabacinski A, et al. A quality improvement project to assess the unplanned 30-day readmission rate of oncology patients (fr206d). *Journal of pain and symptom management*. 2023;65(5):e523.
575. Ramsay JM, Mann K, Kaul S, Zamora ER, Smits-Seemann RR, Kirchhoff AC. Follow-up care provider preferences of adolescent and young adult cancer survivors. *Journal of adolescent and young adult oncology*. 2018;7(2):204-209.
576. Rancour P. Using archetypes and transitions theory to help patients move from active treatment to survivorship. *Clinical Journal of Oncology Nursing*. 2008;12(6):935-940.
577. Rankin NM, York S, Stone E, et al. Pathways to lung cancer diagnosis: A qualitative study of patients and general practitioners about diagnostic and pretreatment intervals. *Annals of the American Thoracic Society*. 2017;14(5):742-753.
578. Rao A, Rich NE, Marrero JA, Yopp AC, Singal AG. Diagnostic and therapeutic delays in patients with hepatocellular carcinoma. *JNCCN Journal of the National Comprehensive Cancer Network*. 2021;19(9):1063-1071.
579. Rariy C, Truesdale L, Ahn ER, et al. Bridging the gap by providing access to oncology care to rural communities: A hybrid delivery model combining in-person visits with telehealth. *Journal of Clinical Oncology*. 2021;39(15 SUPPL).
580. Rayson D, McIntyre P. Transitions to palliation: Two solitudes or inevitable integration? *Current oncology reports*. 2007;9(4):285-289.
581. Reeder-Hayes KE, Baggett C, Jackson BE, et al. Racial differences in impact of geography on breast cancer treatment delay. *Journal of Clinical Oncology*. 2021;39(28 SUPPL).
582. Rege RM, Peyton K, Pajka SE, Grudzen CR, Conroy MJ, Southerland LT. Arranging hospice care from the emergency department: A single center retrospective study. *Journal of pain and symptom management*. 2022;63(3):e281-e286.
583. Reinke LF, Engelberg RA, Shannon SE, et al. Transitions regarding palliative and end-of-life care in severe chronic obstructive pulmonary disease or advanced cancer: Themes identified by patients, families, and clinicians. *Journal of Palliative Medicine*. 2008;11(4):601-609.
584. Reis de Sousa A, Javier Vergara O, Oliveira de Araújo P, de Santana Carvalho ES, Meira Araújo IF, Sousa da Silva R. Transition of elderly men with prostate cancer: Analysis of facilitating and difficulty conditions. *Revista de Pesquisa: Cuidado e Fundamental*. 2022;14(1):1-9.
585. Reville B, Miller MN, Toner RW, Reifsnyder J. End-of-life care for hospitalized patients with lung cancer: Utilization of a palliative care service. *Journal of Palliative Medicine*. 2010;13(10):1261-1266.
586. Rio IM, McNally O. A better model of care after surgery for early endometrial cancer - comprehensive needs assessment and clinical handover to a woman's general practitioner. *Australian and New Zealand Journal of Obstetrics and Gynaecology*. 2017;57(5):558-563.
587. Riolfi M, Mogliani E, Salvetti I, Poles G, Trivellato E, Manno P. Effectiveness and challenges in cancer palliative homecare services: A retrospective cohort study. *Recenti Progressi in Medicina*. 2021;112(10):647-652.
588. Rocío L. Experiences of patient-family caregiver dyads in palliative care during hospital-to-home transition process. *International Journal of Palliative Nursing*. 2017;23(7):332-339.

589. Rodrigues CD, Lorenzini E, Onwuegbuzie AJ, et al. Care transition from the perspectives of oncological patients and the multiprofessional care team: A mixed methods study. *Cancer nursing*. 2022.
590. Rodrigues CD, Lorenzini E, Romero MP, Oelke ND, Winter VDB, Kolankiewicz ACB. Care transitions among oncological patients: From hospital to community. *Revista da Escola de Enfermagem da U S P*. 2023;56:e20220308.
591. Romkey-Sinasac C, Saunders S, Galica J. Canadian resources, programs, and models of care to support cancer survivors' transition beyond treatment: A scoping review. *Current oncology (Toronto, Ont)*. 2021;28(3):2134-2145.
592. Roorda C, Berendsen AJ, Haverkamp M, Van Der Meer K, De Bock GH. Discharge of breast cancer patients to primary care at the end of hospital follow-up: A cross-sectional survey. *European Journal of Cancer*. 2013;49(8):1836-1844.
593. Roorda C, de Bock GH, Scholing C, et al. Patients' preferences for post-treatment breast cancer follow-up in primary care vs. Secondary care: A qualitative study. *Health Expectations: An International Journal of Public Participation in Health Care & Health Policy*. 2015;18(6):2192-2201.
594. Rosenberg CA, Flanagan C, Brockstein B, et al. Promotion of self-management for post treatment cancer survivors: Evaluation of a risk-adapted visit. *Journal of Cancer Survivorship*. 2016;10(1):206-219.
595. Rosenberg LB, Jacobsen JC. Chasing hope: When are requests for hospital transfer a place for palliative care integration? *Journal of hospital medicine*. 2020;15(4):250-251.
596. Rosengren K, Koinberg I. A transition out of the darkness: Patients' experience of the recovery phase after treatment for head and neck cancer. *European journal of oncology nursing : the official journal of European Oncology Nursing Society*. 2021;51:101902.
597. Rosenzweig SJ, Pfail JL, Katims AB, et al. The impact of discharge location on outcomes following radical cystectomy. *Urologic oncology*. 2022;40(2):63.e61-63.e68.
598. Ross LW, Townsend JS, Rohan EA. Still lost in transition? Perspectives of ongoing cancer survivorship care needs from comprehensive cancer control programs, survivors, and health care providers. *International journal of environmental research and public health*. 2022;19(5).
599. Roundtree AK, Giordano SH, Price A, Suarez-Almazor ME. Problems in transition and quality of care: Perspectives of breast cancer survivors. *Supportive Care in Cancer*. 2011;19(12):1921-1929.
600. Roy M, Rummel M, Miller E, Fanslau KL, Gambino P, Hemmert K. Transitions in care for er patients with a suspected cancer diagnosis. *Journal of Clinical Oncology*. 2022;40(28 Supplement):117.
601. Rubens M, Ramamoorthy V, Saxena A, et al. Relationship between insurance status and interhospital transfers among cancer patients in the united states. *BMC cancer*. 2022;22(1):121.
602. Ruddy KJ, Greaney ML, Sprunck-Harrild K, Meyer ME, Emmons KM, Partridge AH. Young women with breast cancer: A focus group study of unmet needs. *Journal of adolescent and young adult oncology*. 2013;2(4):153-160.
603. Russell L, McIntosh R, Martin C, et al. A model of cancer survivorship care within a community health setting: The good life cancer survivorship program. *Journal of cancer survivorship : research and practice*. 2020;14(1):36-42.
604. Russell L, McIntosh R, Martin C, et al. A model of cancer survivorship care within a community health setting: The good life cancer survivorship program. *Journal of cancer survivorship : research and practice*. 2019((Soo) Eastern Health Clinical School, Monash University, Melbourne, VIC, Australia).
605. Rutherford C, Kim B, Tracy M, et al. Experiences of colorectal cancer survivors in transitioning back to primary coordinated healthcare following treatment. *Supportive Care in Cancer*. 2022;30(Supplement 1):S182.



606. Rutkowski N, MacDonald-Liska C, Baines K-A, Samuel V, Harris C, Lebel S. Standardized versus personalized survivorship care plans for breast cancer survivors: A program evaluation. *Canadian oncology nursing journal = Revue canadienne de nursing oncologique*. 2021;31(4):451-456.
607. Rutledge T, Kano M, Guest D, Sussman A, Kinney A. Optimizing endometrial cancer follow-up and survivorship care for rural and other underserved women: Patient and provider perspectives. *Cancer Epidemiology Biomarkers and Prevention*. 2017;26(2 Supplement 1).
608. Saab MM, McCarthy M, O'Driscoll M, et al. A systematic review of interventions to recognise, refer and diagnose patients with lung cancer symptoms. *NPJ primary care respiratory medicine*. 2022;32(1):42.
609. Saab MM, O'Driscoll M, FitzGerald S, et al. Referring patients with suspected lung cancer: A qualitative study with primary healthcare professionals in Ireland. *Health promotion international*. 2022;37(3).
610. Saadat LV, Mahvi DA, Jolissaint JS, Urman RD, Gold JS, Whang EE. Discharge destination following rectal cancer resection: An analysis of preoperative and intraoperative factors. *International journal of colorectal disease*. 2020;35(2):249-257.
611. Sabo B, Johnston G. Understanding the challenges to improve transition to palliative care: An issue for the primary malignant brain tumour population. *Canadian journal of neuroscience nursing*. 2016;38(1):48-55.
612. Sadowski DJ, Warner H, Scaife S, McVary KT, Alanee SR. 30-day all-cause hospital readmission after cystectomy: No worse for rural Medicare residents. *Urologic oncology*. 2018;36(3):89.e87-89.e11.
613. Safaee MM, Morshed RA, Spatz J, Sankaran S, Berger MS, Aghi MK. Interfacility neurosurgical transfers: An analysis of nontraumatic inpatient and emergency department transfers with implications for improvements in care. *Journal of Neurosurgery*. 2019;131(1):281-289.
614. Saka-Herran C, Jane-Salas E, Mari-Roig A, Estrugo-Devesa A, Lopez-Lopez J. Time-to-treatment in oral cancer: Causes and implications for survival. *Cancers*. 2021;13(6).
615. Salner A, Graziano L, DeLisa A, Staff I. Cancer survivorship: A patient navigator program. *Psycho-Oncology*. 2012;21(SUPPL. 1):54.
616. Sanabria D, Rodriguez J, Pecci P, Ardila E, Pareja R. Same-day discharge in minimally invasive surgery performed by gynecologic oncologists: A review of patient selection. *Journal of minimally invasive gynecology*. 2020;27(4):816-825.
617. Sancho Zamora MA, Plaza Canteli S, Pita Carranza AJ, Gonzalez Garcia N. Estimating the short-term prognosis to adjust the transfer of patients with terminal cancer to medium-stay palliative care units. *Revista Clinica Espanola*. 2019;219(6):303-309.
618. Sandager M, Sperling C, Jensen H, Vinter MM, Knudsen JL. Danish cancer patients' perspective on health care: Results from a national survey. *Cognition, Technology & Work*. 2015;17(1):35-44.
619. Sandell T, Schutze H. Factors influencing the translation of shared cancer follow-up care into clinical practice: A systematic review. *BMJ open*. 2022;12(8):e055460.
620. Sander C, Oppermann H, Nestler U, Sander K, von Dercks N, Meixensberger J. Causes and predictors of unplanned readmission in cranial neurosurgery. *World neurosurgery*. 2021;149:e622-e635.
621. Sanft T, Epstein L, Capozza S, et al. Distress in cancer survivors attending a multidisciplinary survivorship clinic. *Psycho-Oncology*. 2015;24(SUPPL. 2):95.
622. Sanuade OA, Ayettey H, Hewlett S, et al. Understanding the causes of breast cancer treatment delays at a teaching hospital in Ghana. *Journal of health psychology*. 2021;26(3):357-366.
623. Sargeran K, Murtomaa H, Safavi SMR. The role of socio-economic factors and dental service utilization in treatment delay among oral cancer patients in Tehran, Iran. *Oral Oncology*. 2013;49(SUPPL. 1):S107.

624. Schermerhorn MC, Grunvald MW, O'Donoghue CM, Rao RD, Becerra AZ. Factors mediating racial/ethnic disparities in delayed treatment of breast cancer. *Annals of surgical oncology*. 2022;29(12):7652-7658.
625. Schiaffino MK, Murphy JD, Moore A, Gilbert P. Factors associated with time-to-treatment risk for diverse older adult cancer patients. *Journal of geriatric oncology*. 2019;10(6 Supplement 1):S123.
626. Schiaffino MK, Murphy JD, Nalawade V, Nguyen P, Shakya H. Association of physician referrals with timely cancer care using tumor registry and claims data. *Health equity*. 2022;6(1):106-115.
627. Schmdit H, Abraham J, Landenberger M, Jahn P. Patient transition from acute care to rehabilitation—first results of a survey of german rehabilitation clinics (optireha). *Oncology Research and Treatment*. 2014;37(SUPPL. 1):80.
628. Schnabel A, Reetz K, Wegener N, Balsen EM, Lordick F, Bercker S. Standardized screening for palliative care needs on elective admission to in-patient oncological unit. *Oncology research and treatment*. 2022;45(Supplement 3):200.
629. Schofield P, Carey M, Love A, Nehill C, Wein S. 'Would you like to talk about your future treatment options?' Discussing the transition from curative cancer treatment to palliative care. *Palliative Medicine*. 2006;20(4):397-406.
630. Schoonbeek RC, Bult FFS, Plaat BEC, et al. Incidental findings during the diagnostic work-up in the head and neck cancer pathway: Effects on treatment delay and survival. *Oral oncology*. 2021;118:105350.
631. Schoonbeek RC, de Vries J, Bras L, Plaat BEC, van Dijk BAC, Halmos GB. Determinants of delay in the head and neck oncology care pathway: The next step in value-based health care. *European journal of cancer care*. 2021;30(4):e13419.
632. Schoonbeek RC, de Vries J, Bras L, et al. The effect of treatment delay on quality of life and overall survival in head and neck cancer patients. *European journal of cancer care*. 2022;31(4):e13589.
633. Schulman-Green D, Bradley EH, Nicholson NR, Jr., George E, Indeck A, McCorkle R. One step at a time: Self-management and transitions among women with ovarian cancer. *Oncology nursing forum*. 2012;39(4):354-360.
634. Schwabe S, Jaspers B, Radbruch L. The social construction of palliative patients: Discourse analysis of the transition from curative to palliative care in medical discourse. *Palliative Medicine*. 2018;32(1 Supplement 1):78.
635. Scott DC, Kendall AH, Litton K, Abrook S. Review of the care pathway for breast cancer patients receiving neoadjuvant chemotherapy in a district general hospital. *Breast cancer research and treatment*. 2020;180(2):562-563.
636. Scott Sutton S, Rao GA, Norris LB, Hardin J, Prasad SM, Bennett CL. Overall survival in hormone-resistant prostate cancer patients with different transition of care within the veterans affairs (va) system. *Journal of Clinical Oncology*. 2013;31(15 SUPPL. 1).
637. Seaman AT, Seligman KL, Nguyen KK, Al-Qurayshi Z, Kendell ND, Pagedar NA. Characterizing head and neck cancer survivors' discontinuation of survivorship care. *Cancer*. 2022;128(1):192-202.
638. Sebring EJ, Rudisill MA, Bates JS, Auten JJ, Urick BY, Clark SM. An evaluation of the effect of pharmacist-led comprehensive chemotherapy consultation services on outpatient appointment adherence. *Journal of managed care & specialty pharmacy*. 2020;26(6):723-727.
639. Sedhom R, Blackford AL, Gupta A, Griffiths K, Heussner J, Carducci MA. End-of-life characteristics associated with short hospice length of stay for patients with solid tumors enrolled in phase i clinical trials. *Journal of the National Comprehensive Cancer Network : JNCCN*. 2021;19(6):686-692.

640. Sekimoto G, Aso S, Hayashi N, et al. Experience of the temporary discharge from the inpatient palliative care unit: A nationwide post-bereavement survey for end-of-life cancer patients. *Asia-Pacific journal of oncology nursing*. 2022;9(5):100058.
641. Seow H, Snyder CF, Shugarman LR, et al. Developing quality indicators for cancer end-of-life care: Proceedings from a national symposium. *Cancer*. 2009;115(17):3820-3829.
642. Shadmi E, Admi H, Ungar L, et al. Cultural aspects in the transition from hospital to community care. *European Journal of Cancer*. 2011;47(SUPPL. 1):S82.
643. Shadmi E, Admi H, Ungar L, et al. Cancer care at the hospital-community interface: Perspectives of patients from different cultural and ethnic groups. *Patient education and counseling*. 2010;79(1):106-111.
644. Shafae MN, Silva LR, Ramalho S, et al. Breast cancer treatment delay in safety-net health systems, houston versus southeast Brazil. *Oncologist*. 2022;27(5):344-351.
645. Shahnazi AF. (un)supportive messages during a time of transition: Younger women's memories of support during the re-entry phase of breast cancer survivorship. *Dissertation Abstracts International: Section B: The Sciences and Engineering*. 2021;82(9-B):No-Specified.
646. Shaikh N, Morrow V, Stokes C, et al. Factors associated with a prolonged diagnosis-to-treatment interval in laryngeal squamous cell carcinoma. *Otolaryngology - Head and Neck Surgery (United States)*. 2022;166(6):1092-1098.
647. Shank BR, Nguyen PAA, Pherson EC. Transitions of care in patients with cancer. *The American journal of managed care*. 2017;23(7):SP280-SP284.
648. Sharma G, Freeman J, Zhang D, Goodwin JS. Continuity of care and intensive care unit use at the end of life. *Archives of Internal Medicine*. 2009;169(1):81-86.
649. Sharma G, Wang Y, Graham JE, Kuo YF, Goodwin JS. Provider continuity prior to the diagnosis of advanced lung cancer and end-of-life care. *PLoS ONE*. 2013;8(9):e74690.
650. Shen AH, Howell D, Edwards E, Warde P, Matthew A, Jones JM. The experience of patients with early-stage testicular cancer during the transition from active treatment to follow-up surveillance. *Urologic Oncology: Seminars and Original Investigations*. 2016;34(4):168.
651. Sheni R, Qin J, Viswanathan S, Castellucci E, Kalnicki S, Mehta V. Predictive factors for cancer treatment delay in a racially diverse and socioeconomically disadvantaged urban population. *JCO oncology practice*. 2023;19(6):e904-e915.
652. Shenolikar R, Doleh Y, Johnson C, Aly A, Luo L, Hussain A. Real-world physician visit patterns and chemotherapy receipt in advanced urothelial cancer. *Journal of Managed Care and Specialty Pharmacy*. 2019;25(10-A SUPPL.):S33-S34.
653. Shih N-C, Kung P-T, Kuo W-Y, Tsai W-C. Association of treatment delay and stage with mortality in breast cancer: A nationwide cohort study in taiwan. *Scientific reports*. 2022;12(1):18915.
654. Shimada N, Ishiki H, Iwase S, et al. Cancer transitional care for terminally ill cancer patients can reduce the number of emergency admissions and emergency department visits. *Am J Hosp Palliat Care*. 2017;34(9):831-837.
655. Shulha M. Survivorship care plans: Assessing the information needs of breast cancer survivors, primary care physicians, and oncology specialists. *Dissertation Abstracts International: Section B: The Sciences and Engineering*. 2021;82(10-B):No-Specified.
656. Shun SC, Lai YH, Hung H, Chen CH, Liang JD, Chou YJ. The role of age in change in unmet supportive care needs in hepatocellular carcinoma patients during transition from hospital to home. *Cancer Nursing*. 2017;40(3):245-254.
657. Siew Ping Lang D, Neo Kim Ang E. Transitional care is feasible and safe for adult cancer. *Singapore Nursing Journal*. 2016;43(1):2-6.
658. Sifontes-Dubon M, Garcia-Lopez JM, Gonzalez-Ortega N, Pazos-Couselo M. Evaluation of a clinical pathway for thyroid nodular disease: Timings and delays in the diagnosis and treatment of thyroid cancer. *Journal of clinical medicine*. 2021;10(23).

659. Silva IFD, Koifman RJ. Delays on treatment initiation and associated factors in a cohort of Brazilian women diagnosed with cervical cancer at the national cancer institute in rio de janeiro. *Journal of Global Oncology*. 2018;4(Supplement 2):60s.
660. Singh S, Eguchi M, Min S-J, Fischer S. Outcomes of patients with cancer discharged to a skilled nursing facility after acute care hospitalization. *Journal of the National Comprehensive Cancer Network : JNCCN*. 2020;18(7):856-865.
661. Singh SRK, Malapati S, Kumar R, Lupak O, Kuriakose P. Predictors of transfer to different facility at discharge in patients admitted with hematologic malignancy: A nationwide inpatient sample (nis) database analysis. *Blood*. 2019;134(Supplement 1).
662. Singh SRK, Malapati SJ, Kumar R, Thanikachalam K, Alkhatib Y. Predictors of transfer to different facility at discharge in patients admitted with metastatic solid malignancy: Five-year national inpatient sample (nis) database analysis. *Journal of Clinical Oncology*. 2019;37(31 Supplement 1).
663. Singh V, Vyas C, Fichadiya H, et al. Trigger-based pathways to increase utilization of palliative care services for cancer patients: A multi-disciplinary approach. *Journal of Clinical Oncology*. 2022;40(16 Supplement 1).
664. Sisler JJ, Nugent Z, Carpenter-Kellett T, Gingerich JR. Comparative study of the perceptions of continuity of care of crc survivors transitioned to primary care. *Journal of Clinical Oncology*. 2017;35(5 Supplement 1).
665. Sisler JJ, Taylor-Brown J, Nugent Z, et al. Continuity of care of colorectal cancer survivors at the end of treatment: The oncology-primary care interface. *Journal of Cancer Survivorship*. 2012;6(4):468-475.
666. Skolarus TA, Zhang Y, Hollenbeck BK. Understanding fragmentation of prostate cancer survivorship care: Implications for cost and quality. *Cancer*. 2012;118(11):2837-2845.
667. Smith C, Bosanquet N, Riley J, Koffman J. Loss, transition and trust: Perspectives of terminally ill patients and their oncologists when transferring care from the hospital into the community at the end of life. *BMJ supportive & palliative care*. 2019;9(3):346-355.
668. Smith KC, White S, DeSanto J, et al. Implementing survivorship care planning in two contrasting health systems: Lessons learned from a randomized controlled trial. *Journal of cancer survivorship : research and practice*. 2022;16(4):791-800.
669. Smith SM, Williams P, Kim J, Alberto J, Schapira L. Health after cancer: An innovative continuing medical education course integrating cancer survivorship into primary care. *Academic medicine : journal of the Association of American Medical Colleges*. 2021;96(8):1164-1167.
670. Smith SDM, Nicol KM, Devereux J, Cornbleet MA. Encounters with doctors: Quantity and quality. *Palliative Medicine*. 1999;13(3):217-223.
671. Smith-Graziani D, Lei X, Giordano SH, Zhao H, Karuturi M, Chavez-MacGregor M. Delayed initiation of adjuvant chemotherapy in older women with breast cancer. *Cancer medicine*. 2020;9(19):6961-6971.
672. Snyder C, Choi Y, Blackford AL, et al. Simplifying survivorship care planning: A randomized controlled trial comparing 3 care plan delivery approaches. *Journal of the National Cancer Institute*. 2022;114(1):139-148.
673. Socwell CP, Bucci L, Patchell S, Kotowicz E, Edbrooke L, Pope R. Utility of mayo clinic's early screen for discharge planning tool for predicting patient length of stay, discharge destination, and readmission risk in an inpatient oncology cohort. *Supportive Care in Cancer*. 2018;26(11):3843-3849.
674. Söderberg I, Trevena I, Fridolfsson A. Transitions during the cancer trajectory. The supportive role of the nurse. *Theoria Journal of Nursing Theory*. 2006;15(1):16-24.
675. Sohl SJ, Sadasivam RS, Kittel C, et al. Pilot study of implementing the shared healthcare actions & reflections electronic systems in survivorship (share-s) program in coordination with clinical care. *Cancer medicine*. 2023.

676. Soltani M, Farahmand M, Pourghaderi AR. Machine learning-based demand forecasting in cancer palliative care home hospitalization. *Journal of biomedical informatics*. 2022;130:104075.
677. Somuri S, Ceballos RM, Hohl SH, Malen RM, Hempstead B, Thompson-Dodd J. Perspectives on transitioning from cancer treatment to breast cancer survivorship. *Cancer Epidemiology Biomarkers and Prevention*. 2015;24(10 SUPPL. 1).
678. Sondergaard EG, Grone BH, Wulff CN, Larsen PV, Sondergaard J. A survey of cancer patients' unmet information and coordination needs in handovers--a cross-sectional study. *BMC research notes*. 2013;6((Sondergaard) Unit for Health Promotion Research in Esbjerg, University of Southern Denmark, Niels Bohrs Vej 9-10, 6700 Esbjerg, Denmark.):378.
679. Song JH, Kantor O, Mittendorf EA, King TA, Minami CA. Race and site of care impact treatment delays in older women with non-metastatic breast cancer. *Annals of surgical oncology*. 2022.
680. Soulia SL, Duffy EA, Morley KA, Smith EML. Implementation of a survivorship care plan program in a community-based oncology clinic. *Journal of the Advanced Practitioner in Oncology*. 2019;10(7):665-676.
681. Steele EM, Holmes JA. The effect of distance from treatment facility on time from diagnosis to treatment in patients with non-metastatic cervical cancer. *International Journal of Radiation Oncology Biology Physics*. 2019;105(1 Supplement):E336.
682. Stensland KD, Delto JC, Ramesh N, et al. The effect of day of discharge on hospital readmission after minimally invasive partial nephrectomy. *The Canadian journal of urology*. 2022;29(2):11080-11086.
683. Sterba KR, Zapka J, LaPelle N, Armeson K, Ford ME. A formative study of colon cancer surveillance care: Implications for survivor-centered interventions. *Journal of Cancer Education*. 2015;30(4):719-727.
684. Stiel S, Joppich R, Korb K, et al. Problems and deficits in the transition from inpatient and outpatient care of cancer patients : A qualitative analysis. *Schmerz*. 2009;23(5):510-517.
685. Stokes WA, Hendrix LH, Royce TJ, et al. Racial differences in time from prostate cancer diagnosis to treatment initiation: A population-based study. *Cancer*. 2013;119(13):2486-2493.
686. Sugumar K, Gendi S, Quereshy HA, et al. An analysis of time to treatment in patients with pancreatic adenocarcinoma. *Surgery (United States)*. 2023.
687. Suryanarayana Deo S, Thejus T. Curative to palliative care-transition and communication issues: Surgeons perspective. *Indian journal of palliative care*. 2013;19(2):120-123.
688. Sussman A, Kano M, Rieder S, Rutledge T. Improving the cancer survivorship journey: Developing a survivorship care transition model for rural and underserved low-risk breast and gynecologic cancer patients. *Gynecologic oncology*. 2022;165(Supplement 1):S17.
689. Sussman J, Howell D, Bainbridge D, et al. Results of a cluster randomized trial to evaluate a nursing lead supportive care intervention in newly diagnosed breast and colorectal cancer patients. *Journal of Clinical Oncology*. 2012;30(15 SUPPL. 1).
690. Sussman J, Baldwin L-M. The interface of primary and oncology specialty care: From diagnosis through primary treatment. *Journal of the National Cancer Institute Monographs*. 2010;2010(40):18-24.
691. Sweeny L, Slijepcevic A, Curry JM, et al. Factors impacting discharge destination following head and neck microvascular reconstruction. *The Laryngoscope*. 2023;133(1):95-104.

692. Swisher AK, Kennedy-Rea S, Starkey A, et al. Bridging the gap: Identifying and meeting the needs of lung cancer survivors. *Journal of Public Health (Germany)*. 2022;30(3):607-612.
693. Tamri Y, Yekta ZP. Effect of a discharge planning program on the quality of life in women with breast cancer. *Journal of Holistic Nursing & Midwifery*. 2022;32(3):186-195.
694. Tan CHH, Wilson S, McConigley R. Experiences of cancer patients in a patient navigation program: A qualitative systematic review. *JBIR database of systematic reviews and implementation reports*. 2015;13(2):136-168.
695. Tan JKT, Wong J, Seo J, Zhu H, Ong J, Chi C. Incidence and outcomes of delayed presentation and surgery in peritoneal surface malignancies. *Pleura and Peritoneum*. 2023;8(1):A10.
696. Tan YY, Blackford J. 'Rapid discharge': Issues for hospital-based nurses in discharging cancer patients home to die. *Journal of Clinical Nursing*. 2015;24(17-18):2601-2610.
697. Tate A. Death and the treatment imperative: Decision-making in late-stage cancer. *Social science & medicine (1982)*. 2022;306:115129.
698. Tawfik B, Jaffe SA, Oomen-Hajagos J, et al. Streamlining survivorship care plan (scp) creation and delivery to primary care providers in poor, rural, and minority patients. *Journal of Clinical Oncology*. 2020;38(15).
699. Taylor C. Reach for recovery: Evaluating a pilot study of a colorectal cancer survivorship programme. *European journal of oncology nursing : the official journal of European Oncology Nursing Society*. 2013;17(2):131-137.
700. Taylor C. Discharge after colorectal cancer surgery 2: Planning. *Nursing times*. 2008;104(29):30-31.
701. Taylor K, Monterosso L, Bulsara C. Qualitative results from a phase ii pilot randomised controlled trial of a lymphoma nurse-led model of survivorship care. *Eur J Oncol Nurs*. 2018;35:9-14.
702. Taylor N, Christie J, Wakefield D. Head and neck cancer end of life care: Complex challenges. *BMJ supportive & palliative care*. 2022.
703. Tennison JM, Ng AH, Rianon NJ, Liu DD, Bruera E. Patient-reported continuity of care and functional safety concerns after inpatient cancer rehabilitation. *Oncologist*. 2021;26(10):887-896.
704. Tennison JM, Rianon NJ, Manzano JG, Munsell MF, George MC, Bruera E. Thirty-day hospital readmission rate, reasons, and risk factors after acute inpatient cancer rehabilitation. *Cancer medicine*. 2021;10(18):6199-6206.
705. Tepper S. A model for care: A transitions program designed to provide comprehensive care in treating individuals with malignant brain tumors. *Smith College Studies in Social Work*. 2003;73(3):337-357.
706. Terrell K, Freeman PA. Retrospective outcome data for transitional care management in the hematologic malignant patient population. *Biology of Blood and Marrow Transplantation*. 2020;26(3 Supplement):S369-S370.
707. Thompson J, Coleman R, Colwell B, et al. Preparing breast cancer patients for survivorship (prep)-a pilot study of a patient-centred supportive group visit intervention. *European Journal of Oncology Nursing*. 2014;18(1):10-16.
708. Thompson K, Palmer S, Dyson G. Adolescents & young adults: Issues in transition from active therapy into follow-up care. *European Journal of Oncology Nursing*. 2009;13(3):207-212.
709. Thomsen TG, Holge-Hazelton B. Patients' vulnerability in follow-up after colorectal cancer. *Cancer Nursing*. 2017;40(2):152-159.

710. Thomson B, Gorospe G, Cooke L, Giesie P, Johnson S. Transitions of care: A hematopoietic stem cell transplantation nursing education project across the trajectory. *Clinical journal of oncology nursing*. 2015;19(4):E74-79.
711. Thon Aamodt IM, Lie I, Helleso R. Nurses' perspectives on the discharge of cancer patients with palliative care needs from a gastroenterology ward. *International journal of palliative nursing*. 2013;19(8):396-402.
712. Thorne SE, Stajduhar KI. Patient perceptions of communications on the threshold of cancer survivorship: Implications for provider responses. *Journal of Cancer Survivorship*. 2012;6(2):229-237.
713. Tillmann BW, Hallet J, Sutradhar R, et al. The impact of unexpected intensive care unit admission after cancer surgery on long-term symptom burden among older adults: A population-based longitudinal analysis. *Critical Care*. 2023;27(1):162.
714. Tola G, Spencer HE, Hall RD, Horton BJ, Gentzler RD. Timeliness to treatment in patients with lung cancer at uva cancer center. *Journal of Clinical Oncology*. 2017;35(8 Supplement 1).
715. Tolbert E, Bowie J, Snyder C, Bantug E, Smith K. A qualitative exploration of the experiences, needs, and roles of caregivers during and after cancer treatment: "That's what i say. I'm a relative survivor". *Journal of cancer survivorship : research and practice*. 2018;12(1):134-144.
716. Tomaszewski JJ, Handorf E, Corcoran A, et al. Association of care transitions with treatment delay for patients with muscle-invasive bladder cancer. *Journal of Clinical Oncology*. 2014;32(4 SUPPL. 1).
717. Tomaszewski JJ, Handorf E, Corcoran AT, et al. Care transitions between hospitals are associated with treatment delay for patients with muscle invasive bladder cancer. *The Journal of urology*. 2014;192(5):1349-1354.
718. Torres SE. The adaptation of a survivorship care plan for low-income colorectal cancer survivors. *Dissertation Abstracts International: Section B: The Sciences and Engineering*. 2015;75(9-B(E)):No-Specified.
719. Tortorella FR, Ewer MS, Douglas-Ntagha PB, Harper G, Walters R, Ecung WB. Developing a transfer center in a tertiary cancer center: Streamlining access and communication to accommodate increasing demand for service. *Journal of healthcare management / American College of Healthcare Executives*. 2011;56(3):199-191.
720. Tralongo P, Gebbia V, Mercadante S, et al. Cancer: New needs, new models. Is it time for a community oncologist? Another brick in the wall. *Cancers*. 2021;13(8).
721. Trask PC, Teno JM, Nash J. Transitions of care and changes in distressing pain. *Journal of Pain and Symptom Management*. 2006;32(2):104-109.
722. Tremblay D, Touati N, Bilodeau K, Prady C, Usher S, Leblanc Y. Risk-stratified pathways for cancer survivorship care: Insights from a deliberative multi-stakeholder consultation. *Current oncology (Toronto, Ont)*. 2021;28(5):3408-3419.
723. Tremblay D, Latreille J, Bilodeau K, et al. Improving the transition from oncology to primary care teams: A case for shared leadership. *Journal of oncology practice*. 2016;12(11):1012-1019.
724. Tremblay D, Prady C, Bilodeau K, et al. Optimizing clinical and organizational practice in cancer survivor transitions between specialized oncology and primary care teams: A realist evaluation of multiple case studies. *BMC health services research*. 2017;17(1):834.
725. Trindade LF, Boell JEW, Lorenzini E, et al. Effectiveness of care transition strategies for colorectal cancer patients: A systematic review and meta-analysis. *Supportive care in cancer : official journal of the Multinational Association of Supportive Care in Cancer*. 2022;30(7):6251-6261.
726. Truant TL, Thorne SE, Balneaves LG, Gotay CC. Promoting equity in cancer survivorship care. *Asia-Pacific Journal of Clinical Oncology*. 2014;10(SUPPL. 9):27-28.
727. Tsai CH, Kung PT, Kuo WY, Tsai WC. Effect of time interval from diagnosis to treatment for non-small cell lung cancer on survival: A national cohort study in taiwan. *BMJ open*. 2020;10(4):e034351.

728. Tsui J, Howard J, O'Malley D, et al. Understanding primary care-oncology relationships within a changing healthcare environment. *BMC family practice*. 2019;20(1):164.
729. Uitdehaag MJ, van der Velden L-A, de Boer MF, et al. Recordings of consultations are beneficial in the transition from curative to palliative cancer care: A pilot-study in patients with oesophageal or head and neck cancer. *European journal of oncology nursing : the official journal of European Oncology Nursing Society*. 2012;16(2):109-114.
730. Ullgren H, Kirkpatrick L, Kilpelainen S, Sharp L. Working in silos? - head & neck cancer patients during and after treatment with or without early palliative care referral. *European journal of oncology nursing : the official journal of European Oncology Nursing Society*. 2017;26(100885136):56-62.
731. Umezawa S, Fujimori M, Matsushima E, Kinoshita H, Uchitomi Y. Preferences of advanced cancer patients for communication on anticancer treatment cessation and the transition to palliative care. *Cancer*. 2015;121(23):4240-4249.
732. Unger-Saldana K, Cedano Guadamos M, Burga Vega AM, Anderson BO, Romanoff A. Delays to diagnosis and barriers to care for breast cancer in Mexico and Peru: A cross-sectional study. *The Lancet Global Health*. 2020;8(Supplement 1):S16.
733. Urban R, Alfaraj F, Olson R, et al. The prognostic impact of radiotherapy delays in oropharynx carcinoma and the role of p16 status. *American Journal of Clinical Oncology: Cancer Clinical Trials*. 2022;45(3):122-128.
734. Valery PC, Bernardes CM, Witt A, et al. Are general practitioners getting the information they need from hospitals and specialists to provide quality cancer care for indigenous Australians? *Internal medicine journal*. 2020;50(1):38-47.
735. Van Den Berg K, Knecht A, Ploum M, Fons G, Lok C, Aarts A. Wait time until surgery in gynecological oncology: Patient preference and experience. *International Journal of Gynecological Cancer*. 2022;32(Supplement 2):A457-A458.
736. Van den Block L, Ko W, Miccinesi G, et al. Final transitions to place of death: Patients and families' wishes. *Journal of public health (Oxford, England)*. 2017;39(4):e302-e311.
737. van der Plas AGM, Oosterveld-Vlug MG, Pasma HR, Schweitzer B, Onwuteaka-Philipsen BD. Continuity of GP care after the last hospitalization for patients who died from cancer, chronic obstructive pulmonary disease or heart failure: A retrospective cohort study using administrative data. *Family practice*. 2019;36(3):304-309.
738. Van Hemelrijck M, Garmo H, Lindhagen L, Bratt O, Stattin P, Adolfsson J. Quantifying the transition from active surveillance to watchful waiting among men with very low-risk prostate cancer. *European Urology*. 2017;72(4):534-541.
739. van Overveld LFJ, Takes RP, Turan AS, et al. Needs and preferences of patients with head and neck cancer in integrated care. *Clinical otolaryngology : official journal of ENT-UK ; official journal of Netherlands Society for Oto-Rhino-Laryngology & Cervico-Facial Surgery*. 2018;43(2):553-561.
740. van Tol FR, Massier JRA, Frederix GWJ, Oner FC, Verkooijen HM, Verlaan JJ. Costs associated with timely and delayed surgical treatment of spinal metastases. *Global spine journal*. 2022;12(8):1661-1666.
741. van Tol FR, Versteeg AL, Verkooijen HM, Oner FC, Verlaan JJ. Time to surgical treatment for metastatic spinal disease: Identification of delay intervals. *Global spine journal*. 2023;13(2):316-323.
742. Vanhuysse M, Bedard PL, Sheiner J, Fitzgerald B, Clemons M. Transfer of follow-up care to family physicians for early-stage breast cancer. *Clinical oncology (Royal College of Radiologists (Great Britain))*. 2007;19(3):172-176.
743. Vaswani S, Kuhner C, Xu J, et al. Establishing a rapid assessment service for patients with suspected malignancies for expedited outpatient management. *The American journal of emergency medicine*. 2023;70:66-69.



744. Vazquez-Calatayud M, Carrascosa-Gil R, Vivar CG. [the transitional survivorship in breast cancer: A narrative review]. *Revista de enfermeria (Barcelona, Spain)*. 2010;33(10):30-39.
745. Verhoef M-J, de Nijs E, Horeweg N, et al. Palliative care needs of advanced cancer patients in the emergency department at the end of life: An observational cohort study. *Supportive care in cancer : official journal of the Multinational Association of Supportive Care in Cancer*. 2020;28(3):1097-1107.
746. Voigt LP, Pastores SM, Raoof ND, Thaler HT, Halpern NA. Review of a large clinical series: Intrahospital transport of critically ill patients: Outcomes, timing, and patterns. *Journal of intensive care medicine*. 2009;24(2):108-115.
747. Vos JAM, Duineveld LAM, Wieldraaijer T, et al. Effect of general practitioner-led versus surgeon-led colon cancer survivorship care, with or without ehealth support, on quality of life (i care): An interim analysis of 1-year results of a randomised, controlled trial. *The Lancet Oncology*. 2021;22(8):1175-1187.
748. Wagle NS, Park S, Washburn D, et al. Racial, ethnic, and socioeconomic disparities in treatment delay among patients with hepatocellular carcinoma in the united states. *Clinical gastroenterology and hepatology : the official clinical practice journal of the American Gastroenterological Association*. 2023;21(5):1281-1292.e1210.
749. Wallner LP, Abrahamse P, Gargaro JG, et al. Improving the delivery of team-based survivorship care after primary breast cancer treatment through a multi-level intervention: A pilot randomized controlled trial. *Breast cancer research and treatment*. 2021;189(1):81-92.
750. Walsh C, Currin-McCulloch J, Simon P, Zebrack B, Jones B. Shifting needs and preferences: Supporting young adult cancer patients during the transition from active treatment to survivorship care. *Journal of adolescent and young adult oncology*. 2019;8(2):114-121.
751. Walsh C, Jang Y, Currin-McCulloch J, Simon P, Cubbin C, Jones B. Pilot use of selected measures from the patient-reported outcomes measurement information system social and mental health domains with young adult cancer patients during the transition to survivorship care. *Journal of adolescent and young adult oncology*. 2019;8(5):635-639.
752. Walsh J, Harrison JD, Young JM, Butow PN, Solomon MJ, Masya L. What are the current barriers to effective cancer care coordination? A qualitative study. *BMC health services research*. 2010;10(101088677):132.
753. Walsh RL, Lofters A, Moineddin R, Krzyzanowska M, Grunfeld E. Primary care continuity and wait times to receiving breast cancer chemotherapy: A population-based retrospective cohort study using canimpact data. *Current Oncology*. 2021;28(6):4786-4804.
754. Wang CY, Brown J. Readmissions after pancreatic surgery in patients with pancreatic cancer: Does hospital variation exist for quality measurement? *Visceral medicine*. 2019((Wang, Brown) Center for Drug Evaluation and Safety, Department of Pharmaceutical Outcomes and Policy, College of Pharmacy, University of Florida, 1225 Center Drive HPNP #3320, Gainesville, FL 32610, United States).
755. Kocarnik JM, Compton K, Dean FE, et al. Cancer incidence, mortality, years of life lost, years lived with disability, and disability-adjusted life years for 29 cancer groups from 2010 to 2019. *JAMA Oncology*. 2022;8(3):420.
756. Wang W, Meng Q, Cheng Y, et al. Immunodeficiencies push readmissions in malignant tumor patients: A retrospective cohort study based on the nationwide readmission database. *Cancers*. 2023;15(1):88.
757. Wang Y, Camateros P, Cheung WY. Young cancer survivors' expectations of physicians for issues of mental health, interpersonal relationships, and reintegration to society. *Journal of Clinical Oncology*. 2016;34(3 SUPPL. 1).
758. Ward WH, DeMora L, Handorf E, et al. Preoperative delays in the treatment of dcis and the associated incidence of invasive breast cancer. *Annals of surgical oncology*. 2020;27(2):386-396.

759. Warde PR, Junk C, Cavers W, Avalos-Reyes E, Johnson KA. Cost differential of costly cancer therapies by site of care. *Journal of Clinical Oncology*. 2022;40(16 Supplement 1).
760. Warren KT, Liu L, Liu Y, et al. Time to treatment initiation and outcomes in high-grade glioma patients in rehabilitation: A retrospective cohort study. *CNS oncology*. 2020;9(4):CNS64.
761. Warsame R, Kasi PM, Villasboas-Bisneto JC, et al. Transition of care for inpatient hematology patients receiving chemotherapy: Development of hospital discharge huddle process and effects of implementation. *Journal of oncology practice*. 2016;12(1):e88-94.
762. Wathne H, Morken IM, Storm M, Husebo AML. Designing a future ehealth service for posthospitalization self-management support in long-term illness: Qualitative interview study. *JMIR human factors*. 2023;10:e39391.
763. Weda S, Zweers D, Suelmann BBM, Meijer RP, Vervoort SCJM. From surviving cancer to getting on with life: Adult testicular germ cell tumor survivors' perspectives on transition from follow-up care to long-term survivorship. *Qualitative health research*. 2023:10497323231173808.
764. Wee C, Varella L, Rybicki LA, Stevenson J. Risk factors for adverse outcomes in solid tumor interhospital transfer patients. *Journal of Clinical Oncology*. 2017;35(8 Supplement 1).
765. Wee CE, Goodman LM, Varella L, et al. Analysis of origins of admission for solid tumor oncology inpatients: Disease severity and outcomes. *Journal of oncology practice*. 2017;13(7):e666-e672.
766. Wellman CD, Franks AM, Stickler M, et al. Targeted care coordination towards patients with a history of multiple readmissions effectively reduces readmissions. *Family practice*. 2023.
767. White K, McKenzie H, Hayes L, et al. Evaluating a shared care pathway intervention to reduce chemotherapy outpatients' unplanned presentations to hospital: A randomised controlled trial (rct). *Asia-Pacific journal of clinical oncology*. 2021;17(SUPPL 9):78.
768. Wield AM, Cohen MG, Toal CT, et al. Same-day hospital discharge after minimally invasive hysterectomy in a gynecologic oncology practice: Feasibility, safety, predictors of admission, and adverse outcomes. *Journal of minimally invasive gynecology*. 2022;29(9):1043-1053.
769. Wijeratne A, Phillips J. Interim analysis of outcomes for transfer of patients from hospice to hospital. *Palliative Medicine*. 2016;30(6):NP127.
770. Wilkins KL, D'Agostino N, Penney AM, Barr RD, Nathan PC. Supporting adolescents and young adults with cancer through transitions: Position statement from the Canadian task force on adolescents and young adults with cancer. *Journal of Pediatric Hematology/Oncology*. 2014;36(7):545-551.
771. Wilkinson L, Hanchanale S, Nwosu AC. Improving information included in hospital palliative care discharge letters: A quality improvement project. *BMJ Supportive and Palliative Care*. 2022;12(Supplement 3):A70.
772. Wilson E. Social work, cancer survivorship and liminality: Meeting the needs of young women diagnosed with early stage breast cancer. *Journal of Social Work Practice*. 2019:No-Specified.
773. Wind LS, Knight TG, Auten JJ, et al. Evaluation and optimization of a clinical pharmacist driven transitions of care model for malignant hematology. *Journal of oncology pharmacy practice : official publication of the International Society of Oncology Pharmacy Practitioners*. 2021;27(2):283-287.
774. Wittal D. How can a seamless transition to community care be achieved in oncology? Gathering a better understanding of the jurisdictional practise across Canada. *Journal of Medical Imaging and Radiation Sciences*. 2017;48((Wittal) Sheffield Hallam University, BC Cancer Agency (CSI), Canada):S6.
775. Wittal DM. Bridging the gap from the oncology setting to community care through a cross-Canada environmental scan. *Canadian oncology nursing journal = Revue canadienne de nursing oncologique*. 2018;28(1):38-45.

776. Wong G, Tang AR, Guidry B, et al. Effect of social determinants of health on post-discharge adverse outcomes after surgical resection of meningioma. *Neurosurgery*. 2023;69(Supplement):101.
777. Wood SK. Transition to cancer survivorship: A concept analysis. *Advances in Nursing Science*. 2018;41(2):145-160.
778. Woods A. The experience of mastectomy patients on the 23-hour pathway. *Cancer Nursing Practice*. 2019;18(2):27-35.
779. Xiang J, Chow R, Reynoso A, et al. Association between postdischarge medical oncology follow-up appointments and downstream health care use: A single-institution experience. *JCO oncology practice*. 2022;18(9):e1466-e1474.
780. Xiong DD, Barriera-Silvestrini P, Knackstedt TJ. Delays in the surgical treatment of melanoma are associated with worsened overall and melanoma-specific mortality: A population-based analysis. *Journal of the American Academy of Dermatology*. 2022;87(4):807-814.
781. Xu S, Tan X, Ma C, et al. An ehealth symptom and complication management program for cancer patients with newly created ostomies and their caregivers (alliance): A pilot feasibility randomized trial. *BMC cancer*. 2023;23(1):532.
782. Xu W, Wells CI, McGuinness M, et al. Characterising nationwide reasons for unplanned hospital readmission after colorectal cancer surgery. *Colorectal disease : the official journal of the Association of Coloproctology of Great Britain and Ireland*. 2023;25(5):861-871.
783. Xu Y, Chen X, Ren J, et al. Analysis for discharge within 2 days after thoracoscopic anatomic lung cancer surgery. *Cancer medicine*. 2023.
784. Xu Y, See MTA, Aloweni F, Binte Abdul Rahim MN, Ang SY. Risk factors for unplanned hospital readmissions within 30 days of discharge among medical oncology patients: A retrospective medical record review. *European journal of oncology nursing : the official journal of European Oncology Nursing Society*. 2020;48:101801.
785. Yang J, He Y, Jiang L, Li K, Peralta LMP. Colorectal patients' readiness for hospital discharge following management of enhanced recovery after surgery pathway: A cross-sectional study from china. *Medicine (United States)*. 2020;99(8):e19219.
786. Yates P, Carter R, Cockerell R, et al. Evaluating a multicomponent survivorship programme for men with prostate cancer in australia: A single cohort study. *BMJ open*. 2022;12(2):e049802.
787. Ye AY, Cheung WY, Goddard KJ, Horvat D, Olson RA. Follow-up patterns of cancer survivors: A survey of Canadian radiation oncologists. *Journal of cancer survivorship : research and practice*. 2015;9(3):388-403.
788. Yee SH, Ljebai A, Saqib M. Timeline in management of muscle invasive bladder cancer (mibc): Single centre outcomes of district general hospital. *British Journal of Surgery*. 2021;108(SUPPL 6):vi280.
789. Yin C-H, Kang B-H, Liu W-S, Pan L-F, Chen H-M, Lee C-C. New prediction tool-list-with improved prediction accuracy for 30-day readmission rates in patients with head and neck cancer after major cancer surgery. *Oral oncology*. 2020;108:104772.
790. Yung R, Ray RM, Roth J, et al. The association of delay in curative intent treatment with survival among breast cancer patients: Findings from the women's health initiative. *Breast cancer research and treatment*. 2020;180(3):747-757.
791. Yurdakul AS, Kocaturk C, Bayiz H, et al. Patient and physician delay in the diagnosis and treatment of non-small cell lung cancer in turkey. *Cancer epidemiology*. 2015;39(2):216-221.
792. Zahfir H, Zoukal S, Hassoune S, Nani S. Factors related to delayed diagnosis and treatment of breast cancer among moroccan women in casablanca. *Indian Journal of Gynecologic Oncology*. 2022;20(4):68.
793. Zanet E, Michieli M, Tirelli U. Cancer survivorship: Is there a role for cancer survivor clinics? *Cancer*. 2014;120(12):1908-1909.

794. Zaveri S, Nevid D, Ru M, et al. Racial disparities in time to treatment persist in the setting of a comprehensive breast center. *Annals of surgical oncology*. 2022;29(11):6692-6703.
795. Zhang J, M.J IJ, Oberoi J, et al. Time to diagnosis and treatment of lung cancer: A systematic overview of risk factors, interventions and impact on patient outcomes. *Lung Cancer*. 2022;166:27-39.
796. Zhang Y, Hsieh MC, Nauman E, Callison K, Tackett S, Shi L. Pcn199 risk factors of treatment delay among non-small cell lung cancer (nslc) patients in louisiana. *Value in Health*. 2021;24(Supplement 1):S56-S57.
797. Zhao CC, Bjurlin MA, Wysock JS, et al. Machine learning decision support model for radical cystectomy discharge planning. *Urologic oncology*. 2022;40(10):453.e459-453.e418.
798. Zhao H, Feng X, Yu R, Gu D, Zhang X. Factors influencing readiness for hospital discharge among patients undergoing laryngectomy. *International Journal of Nursing Practice (John Wiley & Sons, Inc)*. 2020;26(5):1-8.
799. Zibelli A, Holland K, Wei E. Causes of cancer re-admissions: A patient-centered approach. *JCO oncology practice*. 2020;16(8):e734-e740.
800. Zu K, Greenwood KL, LaMori JC, Smith B, Smith T, Lee A. Factors associated with unplanned acute care services for patients with newly diagnosed hematologic malignancies. *JCO clinical cancer informatics*. 2021;5:1197-1206.
801. Zullig LL, Ramos K, Berkowitz C, et al. Assessing key stakeholders' knowledge, needs, and preferences for head and neck cancer survivorship care plans. *Journal of Cancer Education*. 2019;34(3):584-591.
